# Supplementary material for: Novel pyrrolo[2,1- a ]isoquinoline aryl ketones attenuate carbon nanotube-induced acute lung injury through NF-κB pathway inhibition
Source: Royal Society of Chemistry journal article supplement (doi:10.1039/d5ra05055c), 2025-01-01

## Supporting Information

### Novel pyrrolo[2,1-*a*]isoquinoline aryl ketones attenuate carbon nanotube-induced acute lung injury through NF- $\kappa$ B pathway inhibition

Guo-Liang Qiu,<sup>1</sup> Jing Zhang,<sup>2</sup> Zongze Yao,<sup>2</sup> Wei Shao,<sup>4</sup> Jiahong Ma,<sup>3</sup> Hua-Li Qin,<sup>3</sup>  
Wenjian Tang<sup>2,4</sup>

<sup>1</sup> *Department of Pharmacy, Anhui No.2 Provincial People's Hospital, Hefei 230041, China*

<sup>2</sup> *Anhui Province Key Laboratory of Occupational Health, Anhui No.2 Provincial People's Hospital, Hefei 230041, China*

<sup>3</sup> *School of Chemistry, Chemical Engineering and Life Science, Wuhan University of Technology, Wuhan 430070, China*

<sup>4</sup> *School of Pharmacy, Anhui Medical University, Hefei 230032, China*

#### Table of contents

|                                                                                      |     |
|--------------------------------------------------------------------------------------|-----|
| 1. General information .....                                                         | S2  |
| 2. General procedure for preparation of <b>3a–3q</b> .....                           | S2  |
| 3. The preparation of <b>3g</b> and <b>3k</b> as samples for animal experiments..... | S2  |
| 4. Characterization data of <b>3a–3q</b> .....                                       | S3  |
| 5. Raw data of Western blotting.....                                                 | S11 |
| 6. The copies of NMR spectra of <b>3a–3q</b> .....                                   | S22 |
| 7. The copies of HPLC spectra of <b>3a–3q</b> .....                                  | S54 |

## 1. General Information

All reactions were carried out under an air atmosphere unless otherwise specified. Oil bath was used for the heating reactions. NMR spectra were recorded in CDCl<sub>3</sub> on a 500 MHz (for <sup>1</sup>H), 471 MHz (for <sup>19</sup>F), 126 MHz (for <sup>13</sup>C) spectrometer. All chemical shifts are reported in ppm relative to TMS (0 ppm) as an internal standard. The following abbreviations were used to explain the multiplicities: *s* = singlet, *d* = doublet, *t* = triplet, *q* = quartet, *m* = multiplet. The coupling constants were reported in Hertz (Hz). All reagents used in the reactions were all purchased from commercial sources and used without further purification. The product spots on the thin layer chromatography (TLC) were visualized under ultraviolet light (254 nm or 365 nm).

## 2. General procedure for preparation of **3a–3q**

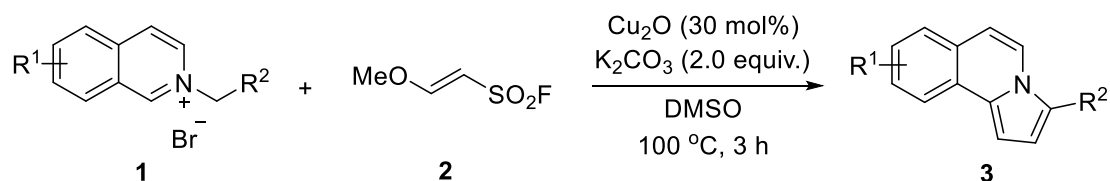

An oven-dried reaction tube equipped with a magnetic stirring bar was charged with isoquinolinium *N*-ylides (**1**, 1.0 mmol), Cu<sub>2</sub>O (30 mol%, 43.0 mg), K<sub>2</sub>CO<sub>3</sub> (2.0 mmol, 2.0 equiv., 276.0 mg), DMSO (5.0 mL) and 2-methoxyethene-1-sulfonyl fluoride (MESF, 3.0 mmol, 3.0 equiv., 420.0 mg). Then the mixture was stirred at 100 °C for 3 h. After the reaction was completed, the mixture was extracted with ethyl acetate (3 × 20 mL) and the combined organic layers were further washed with brine, and dried over anhydrous sodium sulfate. The solvent was concentrated under reduced pressure and the residue was further purified by flash silica gel chromatography using a mixture of petroleum ether, dichloromethane and ethyl acetate as eluent to afford the title products **3a–3q**.

## 3. The preparation of **3g** and **3k** as samples for animal experiments

An oven-dried reaction tube equipped with a magnetic stirring bar was charged with isoquinolinium *N*-ylides (**1**, 10.0 mmol), Cu<sub>2</sub>O (30 mol%, 429.0 mg), K<sub>2</sub>CO<sub>3</sub> (20.0

mmol, 2.0 equiv., 2.76 g), DMSO (45.0 mL) and 2-methoxyethene-1-sulfonyl fluoride (MESF, 50.0 mmol, 30 equiv., 4.20 g). Then the mixture was stirred at 60 °C for 24 h. After the reaction was completed, the mixture was extracted with ethyl acetate (3 × 150 mL) and the combined organic layers were further washed with brine, and dried over anhydrous sodium sulfate. The solvent was concentrated under reduced pressure and the residue was further purified by flash silica gel chromatography using a mixture of petroleum ether and ethyl acetate as eluent to afford products **3g** and **3k**, their yields were 72% and 81%, respectively.

#### 4. Characterization data of **3a–3q**

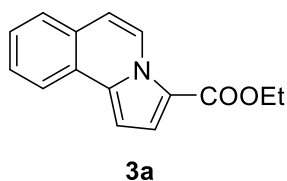

*Ethyl pyrrolo[2,1-a]isoquinoline-3-carboxylate (3a)*. White solid, 187 mg, 78% yield. Purified by column chromatography on silica gel using petroleum ether / ethyl acetate = 10:1 (v/v) as eluent, purity, 98.84%. <sup>1</sup>H NMR (500 MHz, CDCl<sub>3</sub>) δ 9.23 (d, *J* = 7.5 Hz, 1H), 8.11 (d, *J* = 8.0 Hz, 1H), 7.66 (d, *J* = 7.5 Hz, 1H), 7.55-7.48 (m, 3H), 7.00 (d, *J* = 5.0 Hz, 2H), 4.40 (q, *J* = 7.0 Hz, 2H), 1.43 (t, *J* = 7.0 Hz, 3H). <sup>13</sup>C NMR (126 MHz, CDCl<sub>3</sub>) δ 161.5, 135.4, 127.9, 127.6, 127.3, 126.9, 125.2, 125.0, 123.2, 120.6, 116.7, 112.6, 101.0, 60.0, 14.6.

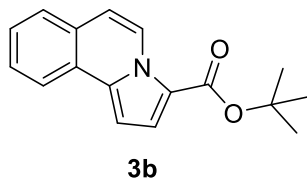

*Tert-butyl pyrrolo[2,1-a]isoquinoline-3-carboxylate (3b)*. White solid, 200 mg, 75% yield. Purified by column chromatography on silica gel using petroleum ether / ethyl acetate = 10:1 (v/v) as eluent, purity, 98.02%. <sup>1</sup>H NMR (500 MHz, CDCl<sub>3</sub>) δ 9.22 (d, *J* = 7.5 Hz, 1H), 8.11 (d, *J* = 8.0 Hz, 1H), 7.65 (d, *J* = 7.5 Hz, 1H), 7.54-7.43 (m, 3H), 6.97 (d, *J* = 8.0 Hz, 2H), 1.65 (s, 9H). <sup>13</sup>C NMR (126 MHz, CDCl<sub>3</sub>) δ 161.2, 135.1,

127.8, 127.6, 127.2, 126.9, 125.4, 125.1, 123.1, 120.5, 118.0, 112.4, 100.7, 80.7, 28.7.

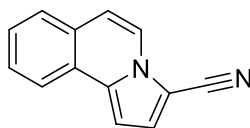

**3c**

*Pyrrolo[2,1-a]isoquinoline-3-carbonitrile (3c)*. White solid, 115 mg, 60% yield. Purified by column chromatography on silica gel using petroleum ether / ethyl acetate = 10:1 (v/v) as eluent, purity, 99.89%. **<sup>1</sup>H NMR** (500 MHz, CDCl<sub>3</sub>)  $\delta$  8.03 (d,  $J$  = 8.0 Hz, 1H), 7.97 (d,  $J$  = 7.5 Hz, 1H), 7.62 (d,  $J$  = 8.0 Hz, 1H), 7.56-7.47 (m, 2H), 7.25 (d,  $J$  = 4.0 Hz, 1H), 6.97 (d,  $J$  = 7.0 Hz, 1H), 6.90 (d,  $J$  = 4.0 Hz, 1H). **<sup>13</sup>C NMR** (126 MHz, CDCl<sub>3</sub>)  $\delta$  134.3, 128.5, 127.9, 127.7, 127.4, 125.1, 123.1, 122.6, 121.9, 113.8, 113.7, 101.5, 97.8.

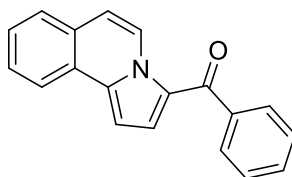

**3d**

*Phenyl(pyrrolo[2,1-a]isoquinolin-3-yl)methanone (3d)*. Yellow solid, 190 mg, 70% yield. Purified by column chromatography on silica gel using petroleum ether / dichloromethane = 1:1 (v/v) as eluent, purity, 99.99%. **<sup>1</sup>H NMR** (500 MHz, CDCl<sub>3</sub>)  $\delta$  9.62 (d,  $J$  = 7.5 Hz, 1H), 8.18 (d,  $J$  = 7.5 Hz, 1H), 7.86 (d,  $J$  = 7.5 Hz, 2H), 7.73 (d,  $J$  = 7.0 Hz, 1H), 7.59-7.49 (m, 5H), 7.32 (d,  $J$  = 4.5 Hz, 1H), 7.12 (d,  $J$  = 7.5 Hz, 1H), 7.05 (d,  $J$  = 4.0 Hz, 1H). **<sup>13</sup>C NMR** (126 MHz, CDCl<sub>3</sub>)  $\delta$  185.5, 140.7, 137.1, 131.2, 129.2, 129.0, 128.3, 128.1, 127.8, 127.0, 126.0, 125.9, 124.8, 123.7, 113.5, 102.0. Note: In the <sup>13</sup>C NMR spectrum of **3k**, theoretically, there should be seventeen peaks. Due to the compact overlaying, it is difficult to specify the overlaying peaks.

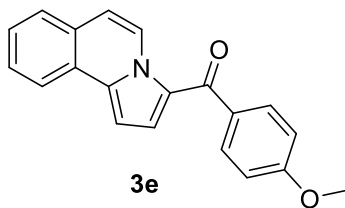

(4-Methoxyphenyl)(pyrrolo[2,1-a]isoquinolin-3-yl)methanone (**3e**). Yellow solid, 151 mg, 50 % yield. Purified by column chromatography on silica gel using petroleum ether / dichloromethane = 1:1 (v/v) as eluent, purity, 98.81%. <sup>1</sup>H NMR (500 MHz, CDCl<sub>3</sub>) δ 9.54 (d, *J* = 8.0 Hz, 1H), 8.17 (d, *J* = 7.5 Hz, 1H), 7.89-7.86 (m, 2H), 7.72-7.71 (m, 1H), 7.59-7.52 (m, 2H), 7.32 (d, *J* = 4.5 Hz, 1H), 7.09 (d, *J* = 7.5 Hz, 1H), 7.05 (d, *J* = 4.5 Hz, 1H), 7.02-6.99 (m, 2H), 3.90 (s, 3H). <sup>13</sup>C NMR (126 MHz, CDCl<sub>3</sub>) δ 184.6, 162.4, 136.7, 133.2, 131.5, 129.0, 128.0, 127.8, 127.0, 126.0, 125.3, 124.9, 123.7, 113.6, 113.3, 101.8, 55.6. Note: In the <sup>13</sup>C NMR spectrum of **3m**, theoretically, there should be eighteen peaks. Due to the compact overlaying, it is difficult to specify the overlaying peaks.

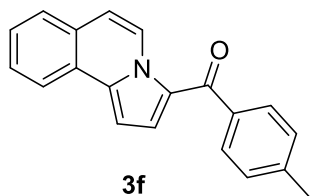

Pyrrolo[2,1-a]isoquinolin-3-yl(*p*-tolyl)methanone (**3f**). Yellow solid, 257 mg, 90% yield. Purified by column chromatography on silica gel using petroleum ether / dichloromethane = 1:1 (v/v) as eluent, purity, 95.08%. <sup>1</sup>H NMR (500 MHz, CDCl<sub>3</sub>) δ 9.59 (d, *J* = 7.5 Hz, 1H), 8.17 (d, *J* = 7.5 Hz, 1H), 7.77 (d, *J* = 8.0 Hz, 2H), 7.73-7.71 (m, 1H), 7.59-7.53 (m, 2H), 7.33-7.30 (m, 3H), 7.11 (d, *J* = 8.0 Hz, 1H), 7.05 (d, *J* = 4.0 Hz, 1H), 2.46 (s, 3H). <sup>13</sup>C NMR (126 MHz, CDCl<sub>3</sub>) δ 185.5, 141.8, 138.0, 136.9, 129.4, 129.0, 129.0, 128.1, 127.8, 127.0, 126.0, 125.8, 125.0, 124.9, 123.7, 113.4, 101.9, 21.7.

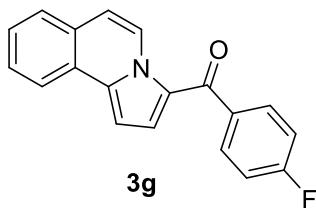

(4-Fluorophenyl)(pyrrolo[2,1-a]isoquinolin-3-yl)methanone (**3g**). Yellow solid, 119 mg, 41% yield. Purified by column chromatography on silica gel using petroleum ether / dichloromethane = 1:1 (v/v) as eluent, purity, 99.99%. **<sup>1</sup>H NMR** (500 MHz, CDCl<sub>3</sub>)  $\delta$  9.57 (d,  $J$  = 7.0 Hz, 1H), 8.19 (d,  $J$  = 7.5 Hz, 1H), 7.89-7.87 (m, 2H), 7.75-7.73 (m, 1H), 7.61-7.55 (m, 2H), 7.29 (d,  $J$  = 4.5 Hz, 1H), 7.20-7.17 (m, 2H), 7.14 (d,  $J$  = 7.5 Hz, 1H), 7.07 (d,  $J$  = 4.5 Hz, 1H). **<sup>13</sup>C NMR** (126 MHz, CDCl<sub>3</sub>)  $\delta$  183.9, 164.7 (d,  $J$  = 252.0 Hz), 137.1, 136.8 (d,  $J$  = 3.7 Hz), 131.5 (d,  $J$  = 8.2 Hz), 129.0, 128.1, 127.8, 127.0, 125.8, 125.7, 124.7, 124.5, 123.7, 115.3 (d,  $J$  = 21.8 Hz), 113.5, 102.0.

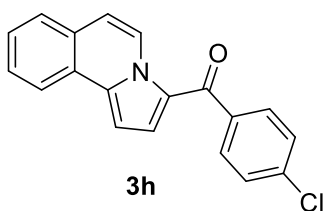

(4-Chlorophenyl)(pyrrolo[2,1-a]isoquinolin-3-yl)methanone (**3h**). Yellow solid, 122 mg, 40% yield. Purified by column chromatography on silica gel using petroleum ether / dichloromethane = 1:1 (v/v) as eluent, purity, 98.90%. **<sup>1</sup>H NMR** (500 MHz, CDCl<sub>3</sub>)  $\delta$  9.58 (d,  $J$  = 7.5 Hz, 1H), 8.19 (d,  $J$  = 7.5 Hz, 1H), 7.80 (d,  $J$  = 8.5 Hz, 2H), 7.75-7.73 (m, 1H), 7.61-7.56 (m, 2H), 7.48 (d,  $J$  = 8.5 Hz, 2H), 7.28 (d,  $J$  = 4.5 Hz, 1H), 7.14 (d,  $J$  = 7.5 Hz, 1H), 7.07 (d,  $J$  = 4.5 Hz, 1H). **<sup>13</sup>C NMR** (126 MHz, CDCl<sub>3</sub>)  $\delta$  184.0, 165.9, 139.1, 137.5, 137.4, 130.6, 129.1, 128.6, 128.3, 128.0, 127.1, 125.9, 124.7, 124.5, 123.8, 113.7, 102.3.

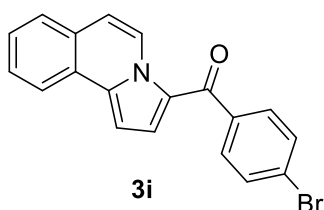

(4-Bromophenyl)(pyrrolo[2,1-*a*]isoquinolin-3-yl)methanone (**3i**). Yellow solid, 122 mg, 48% yield. Purified by column chromatography on silica gel using petroleum ether / dichloromethane = 1:1 (v/v) as eluent, purity, 99.99%. **<sup>1</sup>H NMR** (500 MHz, CDCl<sub>3</sub>)  $\delta$  9.58 (d, *J* = 7.5 Hz, 1H), 8.20-8.18 (m, 1H), 7.75-7.71 (m, 3H), 7.66-7.63 (m, 2H), 7.61-7.55 (m, 2H), 7.28 (d, *J* = 4.5 Hz, 1H), 7.14 (d, *J* = 7.5 Hz, 1H), 7.06 (d, *J* = 4.5 Hz, 1H). **<sup>13</sup>C NMR** (126 MHz, CDCl<sub>3</sub>)  $\delta$  184.1, 139.5, 137.4, 131.6, 130.8, 129.1, 128.3, 128.0, 127.1, 125.9, 125.9, 124.7, 124.5, 123.8, 113.7, 102.3. Note: In the <sup>13</sup>C NMR spectrum of **3q**, theoretically, there should be seventeen peaks. Due to the compact overlaying, it is difficult to specify the overlaying peaks.

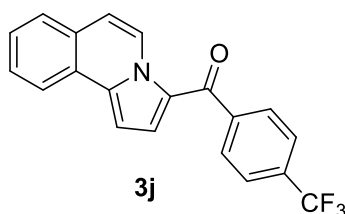

Pyrrolo[2,1-*a*]isoquinolin-3-yl(4-(trifluoromethyl)phenyl)methanone (**3j**). Yellow solid, 110 mg, 32% yield. M.p. 236-238 °C. Purified by column chromatography on silica gel using petroleum ether / dichloromethane = 1:1 (v/v) as eluent, purity, 98.19%. **<sup>1</sup>H NMR** (500 MHz, CDCl<sub>3</sub>)  $\delta$  9.64 (d, *J* = 7.5 Hz, 1H), 8.23-8.21 (m, 1H), 7.96 (d, *J* = 8.0 Hz, 2H), 7.80-7.77 (m, 3H), 7.65-7.59 (m, 2H), 7.29 (d, *J* = 4.0 Hz, 1H), 7.20 (d, *J* = 7.5 Hz, 1H), 7.10 (d, *J* = 5.0 Hz, 1H). **<sup>13</sup>C NMR** (126 MHz, CDCl<sub>3</sub>)  $\delta$  183.9, 144.0, 137.8, 132.9, 132.6, 129.4, 129.3, 128.5, 128.1, 127.2, 126.4, 125.9, 125.4 (q, *J* = 3.7 Hz), 125.1, 124.7, 124.4, 123.9, 122.9, 114.0, 102.6. **HRMS-ESI** (*m/z*) calcd. for [C<sub>20</sub>H<sub>13</sub>F<sub>3</sub>NO]<sup>+</sup> ([M+H]<sup>+</sup>): 340.0944, found: 340.0951.

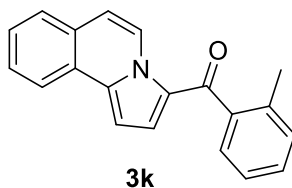

Pyrrolo[2,1-*a*]isoquinolin-3-yl(*o*-tolyl)methanone (**3k**). Yellow solid, 177 mg, 62% yield. M.p. 87-89 °C. Purified by column chromatography on silica gel using petroleum

ether / dichloromethane = 1:1 (v/v) as eluent, purity, 99.85%. **<sup>1</sup>H NMR** (500 MHz, CDCl<sub>3</sub>)  $\delta$  9.73 (d,  $J$  = 7.5 Hz, 1H), 8.18 (d,  $J$  = 8.0 Hz, 1H), 7.75 (d,  $J$  = 7.0 Hz, 1H), 7.60-7.55 (m, 2H), 7.45 (d,  $J$  = 7.5 Hz, 1H), 7.39 (t,  $J$  = 7.5 Hz, 1H), 7.31-7.27 (m, 2H), 7.15 (d,  $J$  = 7.5 Hz, 1H), 7.05 (d,  $J$  = 4.5 Hz, 1H), 7.01 (d,  $J$  = 4.5 Hz, 1H), 2.43 (s, 3H). **<sup>13</sup>C NMR** (126 MHz, CDCl<sub>3</sub>)  $\delta$  187.5, 140.7, 137.3, 136.2, 130.8, 129.6, 129.2, 128.3, 128.2, 127.9, 127.1, 126.5, 126.1, 125.6, 125.2, 124.8, 123.8, 113.7, 102.2, 19.8. **HRMS-ESI** (m/z) calcd. for [C<sub>20</sub>H<sub>16</sub>NO]<sup>+</sup> ([M+H]<sup>+</sup>): 286.1227, found: 286.1234.

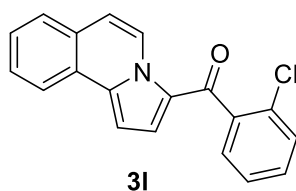

(2-Chlorophenyl)(pyrrolo[2,1-a]isoquinolin-3-yl)methanone (**3l**). Yellow solid, 116 mg, 38% yield. Purified by column chromatography on silica gel using petroleum ether / dichloromethane = 1:1 (v/v) as eluent, purity, 99.83%. **<sup>1</sup>H NMR** (500 MHz, CDCl<sub>3</sub>)  $\delta$  9.69 (d,  $J$  = 7.5 Hz, 1H), 8.18-8.16 (m, 1H), 7.75-7.74 (m, 1H), 7.60-7.56 (m, 2H), 7.50-7.48 (m, 2H), 7.43-7.40 (m, 1H), 7.38-7.35 (m, 1H), 7.17 (d,  $J$  = 7.5 Hz, 1H), 7.03-7.00 (m, 2H). **<sup>13</sup>C NMR** (126 MHz, CDCl<sub>3</sub>)  $\delta$  183.3, 140.0, 137.8, 131.5, 130.6, 130.1, 129.3, 129.2, 128.4, 128.0, 127.1, 126.6, 126.5, 126.0, 124.7, 124.6, 123.9, 113.9, 102.7.

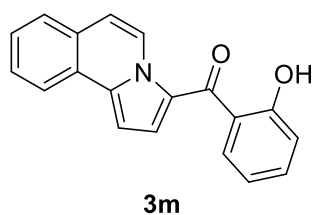

(2-Hydroxyphenyl)(pyrrolo[2,1-a]isoquinolin-3-yl)methanone (**3m**). Yellow solid, 161 mg, 56% yield. M.p. 142-144 °C. Purified by column chromatography on silica gel using petroleum ether / ethyl acetate = 10:1 (v/v) as eluent, purity, 98.51%. **<sup>1</sup>H NMR** (500 MHz, CDCl<sub>3</sub>)  $\delta$  11.57 (s, 1H), 9.31 (d,  $J$  = 7.5 Hz, 1H), 8.18 (d,  $J$  = 8.0 Hz, 1H), 7.90 (d,  $J$  = 8.0 Hz, 1H), 7.73 (d,  $J$  = 7.0 Hz, 1H), 7.61-7.55 (m, 2H), 7.49-7.44 (m, 2H), 7.11-7.06 (m, 3H), 6.96 (t,  $J$  = 7.5 Hz, 1H). **<sup>13</sup>C NMR** (126 MHz, CDCl<sub>3</sub>)  $\delta$  187.1, 162.0,



137.6, 134.6, 132.1, 129.1, 128.4, 128.0, 127.1, 126.1, 125.8, 124.8, 124.2, 123.8, 121.5, 118.8, 118.2, 113.6, 102.6. **HRMS-ESI** (m/z) calcd. for  $[C_{19}H_{14}NO_2]^+$  ( $[M+H]^+$ ): 288.1020, found: 288.1015.

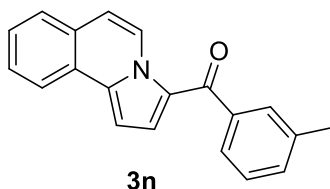

*Pyrrolo[2,1-a]isoquinolin-3-yl(m-tolyl)methanone (3n)*. Yellow solid, 185 mg, 65% yield. M.p. 123-125 °C. Purified by column chromatography on silica gel using petroleum ether / dichloromethane = 1:1 (v/v) as eluent, purity, 99.84%. **<sup>1</sup>H NMR** (500 MHz, CDCl<sub>3</sub>)  $\delta$  9.61 (d,  $J$  = 7.0 Hz, 1H), 8.19-8.18 (m, 1H), 7.74-7.72 (m, 1H), 7.66-7.63 (m, 2H), 7.60-7.54 (m, 2H), 7.40-7.37 (m, 2H), 7.32(d,  $J$  = 4.0 Hz, 1H), 7.12 (d,  $J$  = 7.5 Hz, 1H), 7.05 (d,  $J$  = 4.5 Hz, 1H), 2.46 (s, 3H). **<sup>13</sup>C NMR** (126 MHz, CDCl<sub>3</sub>)  $\delta$  185.8, 140.8, 138.1, 137.0, 132.0, 129.8, 129.1, 128.1, 127.9, 127.1, 126.5, 126.0, 124.9, 124.9, 123.8, 113.5, 102.0, 21.6. Note: In the <sup>13</sup>C NMR spectrum of **3v**, theoretically, there should be twenty peaks. Due to the compact overlaying, it is difficult to specify the overlaying peaks. **HRMS-ESI** (m/z) calcd. for  $[C_{20}H_{16}NO]^+$  ( $[M+H]^+$ ): 286.1227, found: 286.1225.

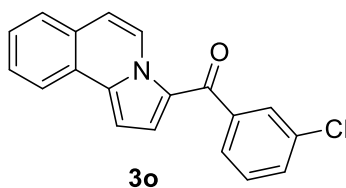

*(3-Chlorophenyl)(pyrrolo[2,1-a]isoquinolin-3-yl)methanone (3o)*. Yellow solid, 128 mg, 42% yield. Purified by column chromatography on silica gel using petroleum ether / dichloromethane = 1:1 (v/v) as eluent, purity, 99.38%. **<sup>1</sup>H NMR** (500 MHz, CDCl<sub>3</sub>)  $\delta$  9.59 (d,  $J$  = 7.5 Hz, 1H), 8.21-8.19 (m, 1H), 7.82 (t,  $J$  = 2.0 Hz, 1H), 7.76-7.71 (m, 2H), 7.62-7.56 (m, 2H), 7.54-7.52 (m, 1H), 7.44 (t,  $J$  = 7.5 Hz, 1H), 7.30 (d,  $J$  = 5.0 Hz, 1H), 7.16 (d,  $J$  = 7.5 Hz, 1H), 7.07 (d,  $J$  = 4.5 Hz, 1H). **<sup>13</sup>C NMR** (126 MHz, CDCl<sub>3</sub>)  $\delta$  183.7, 142.4, 137.6, 134.5, 131.2, 129.6, 129.2, 129.2, 128.4, 128.0, 127.3, 127.1, 126.2, 125.9,

124.7, 124.4, 123.9, 113.8, 102.4.

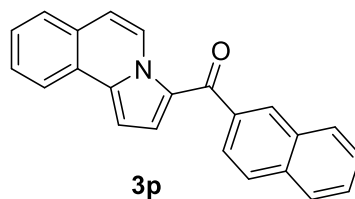

*Naphthalen-2-yl(pyrrolo[2,1-a]isoquinolin-3-yl)methanone (3p)*. Yellow solid, 167 mg, 52% yield. Purified by column chromatography on silica gel using petroleum ether / dichloromethane = 1:1 (v/v) as eluent, purity, 98.65%. **<sup>1</sup>H NMR** (500 MHz, CDCl<sub>3</sub>)  $\delta$  9.65 (d,  $J$  = 7.5 Hz, 1H), 8.36 (s, 1H), 8.22-8.20 (m, 1H), 7.98-7.93 (m, 4H), 7.76-7.74 (m, 1H), 7.62-7.56 (m, 4H), 7.39 (d,  $J$  = 5.0 Hz, 1H), 7.16 (d,  $J$  = 7.5 Hz, 1H), 7.09 (d,  $J$  = 4.5 Hz, 1H). **<sup>13</sup>C NMR** (126 MHz, CDCl<sub>3</sub>)  $\delta$  185.5, 138.0, 137.2, 134.9, 132.6, 130.0, 129.3, 129.1, 128.2, 128.2, 128.0, 127.9, 127.8, 127.1, 126.8, 126.2, 126.0, 125.9, 125.1, 124.9, 123.8, 113.6, 102.2.

**Raw data of Western blotting:**

**P-IKB alpha and ACTIN**

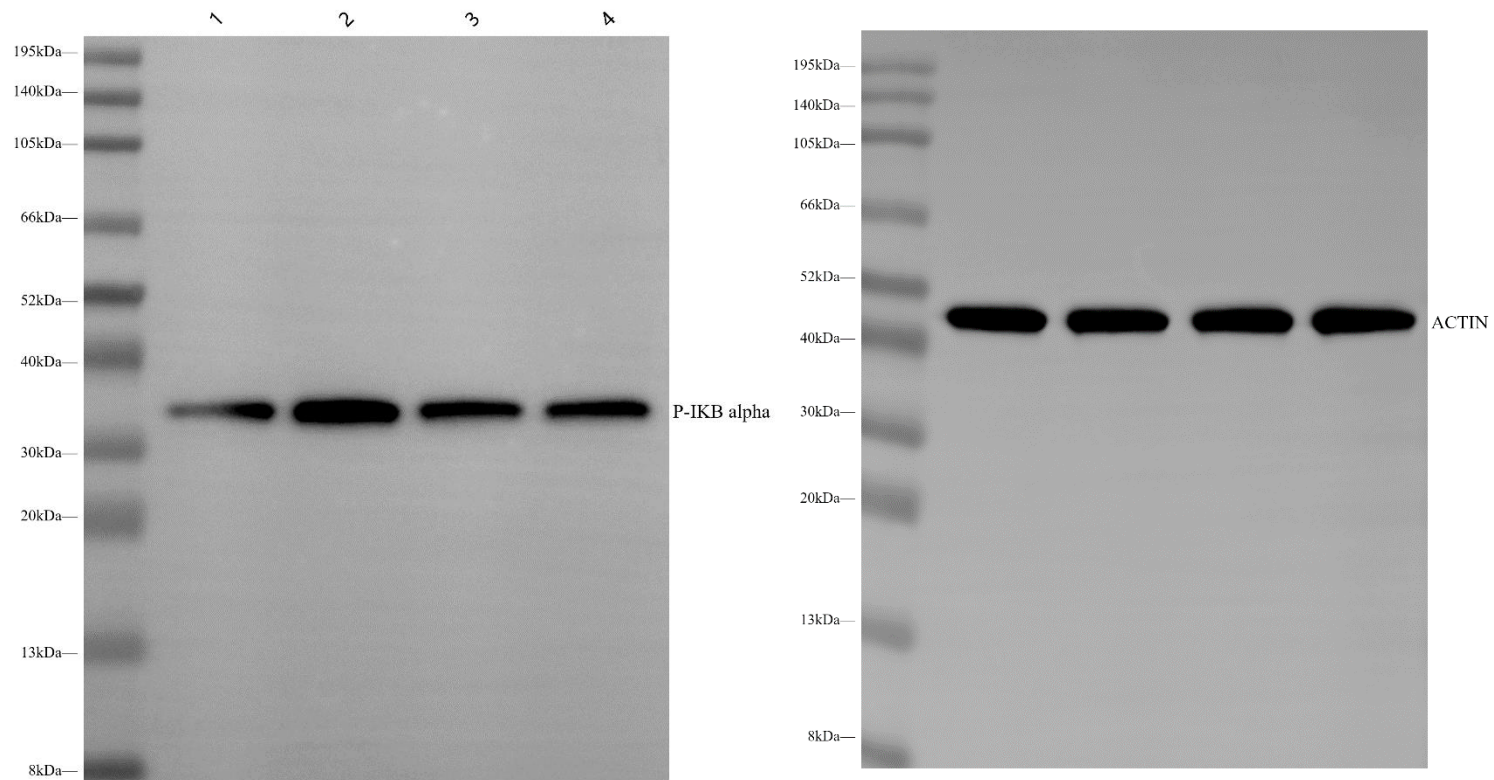

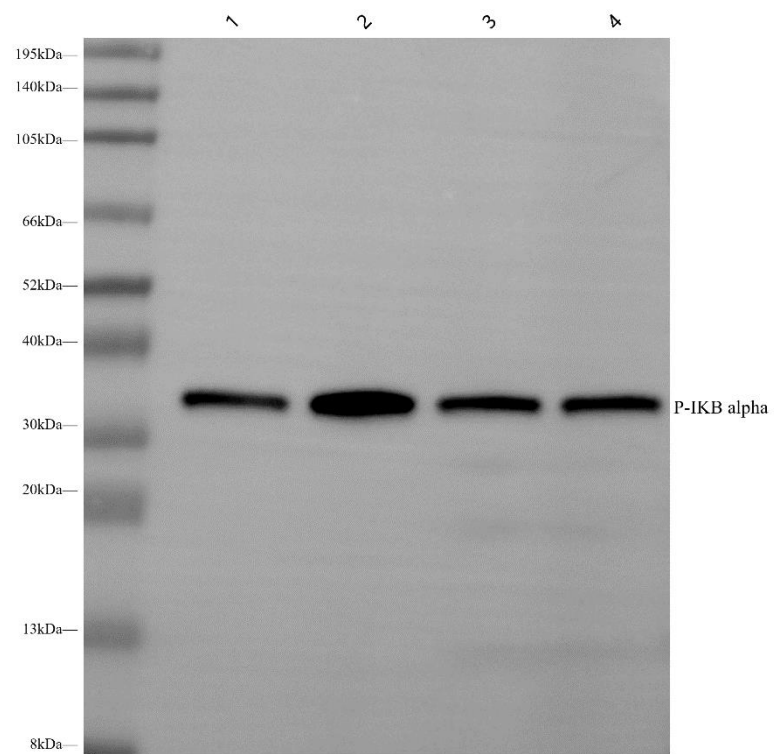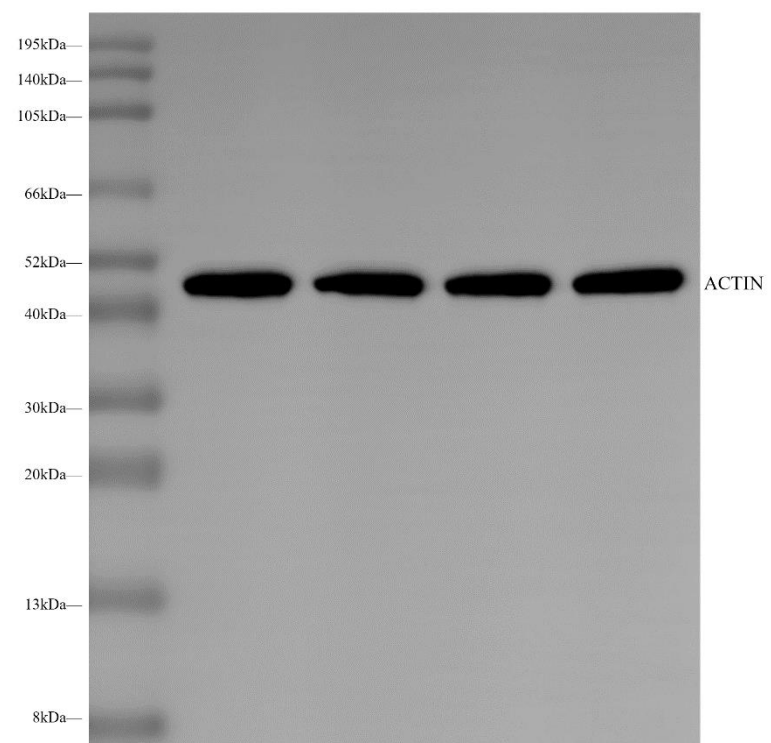

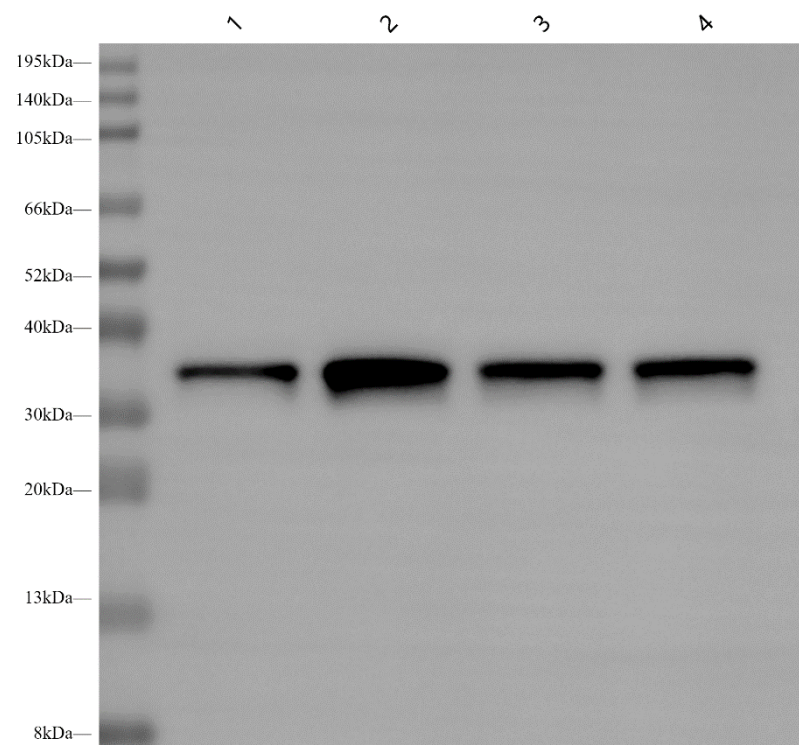

P-IKB alpha

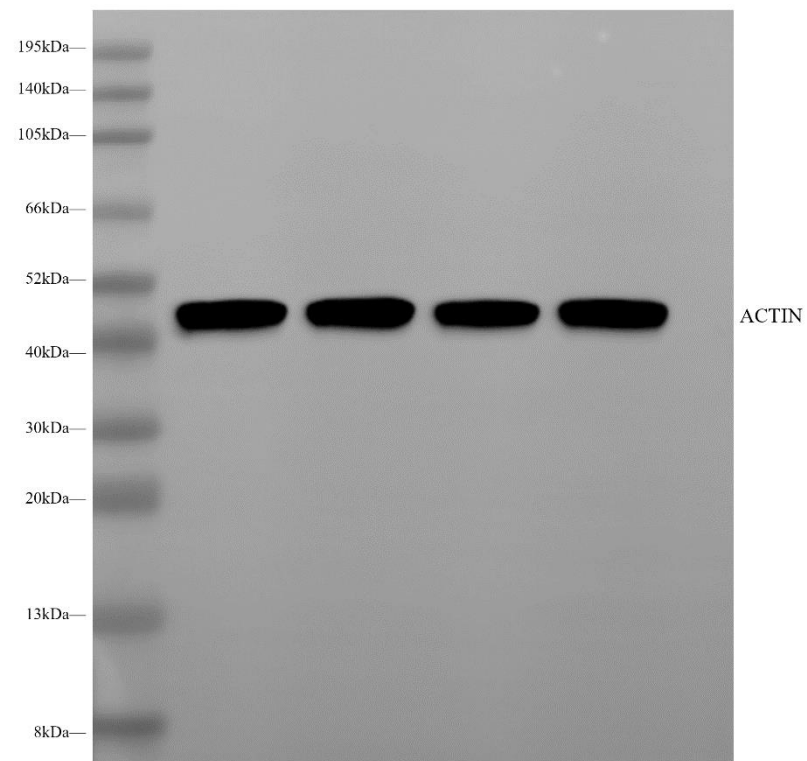

ACTIN

Raw data: P-P65, P65, IKB alpha and ACTIN

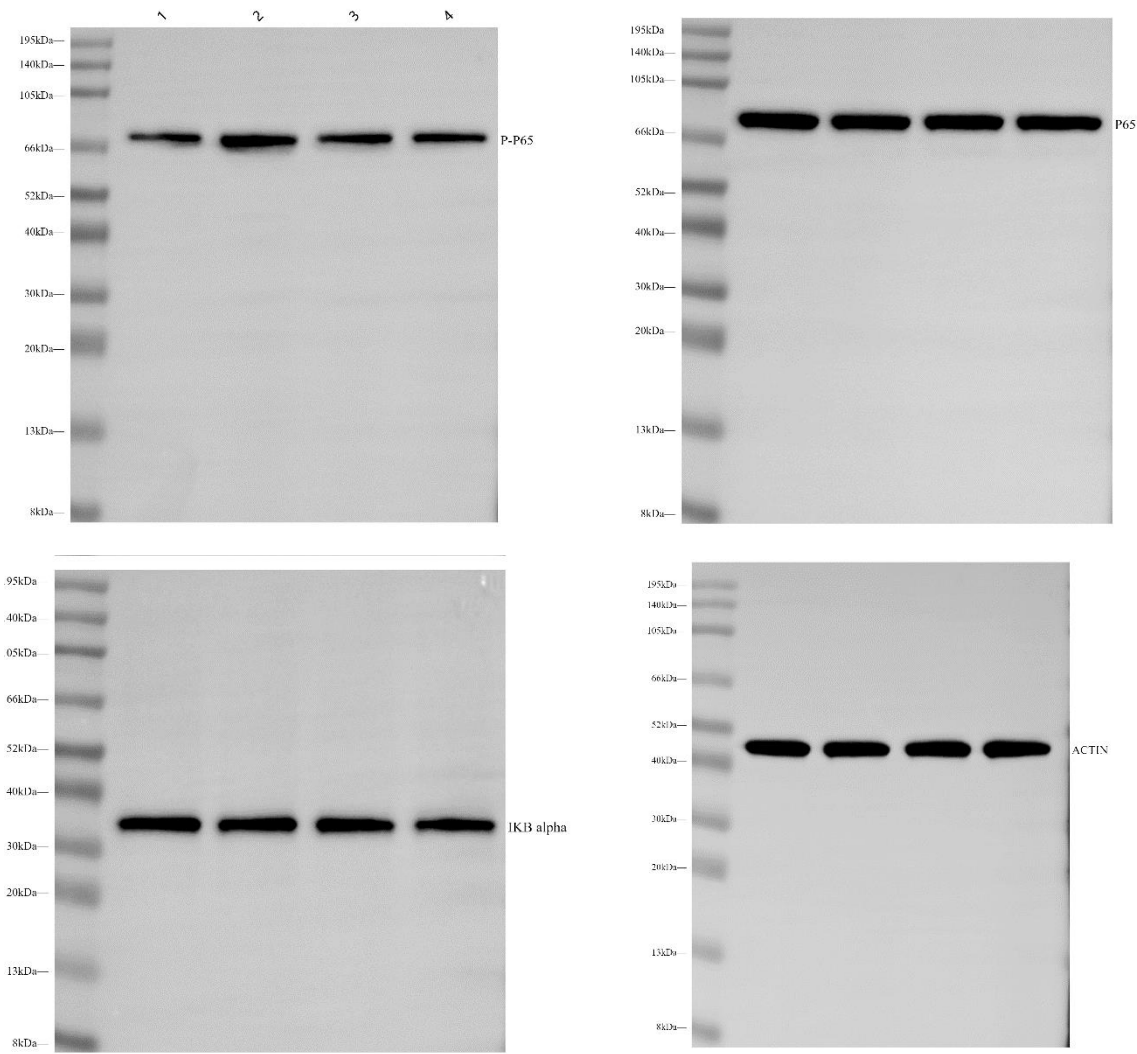

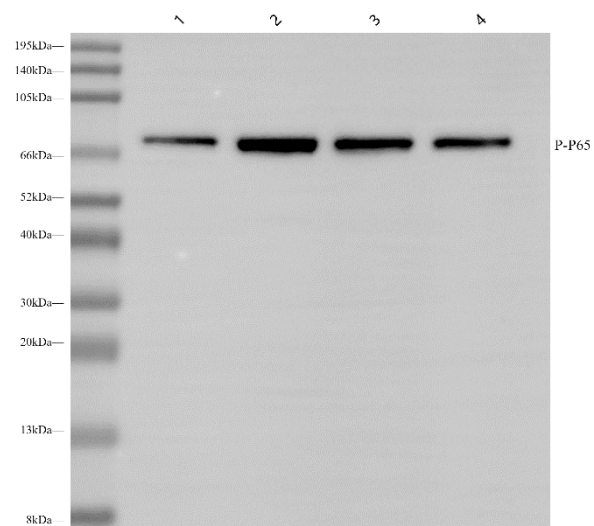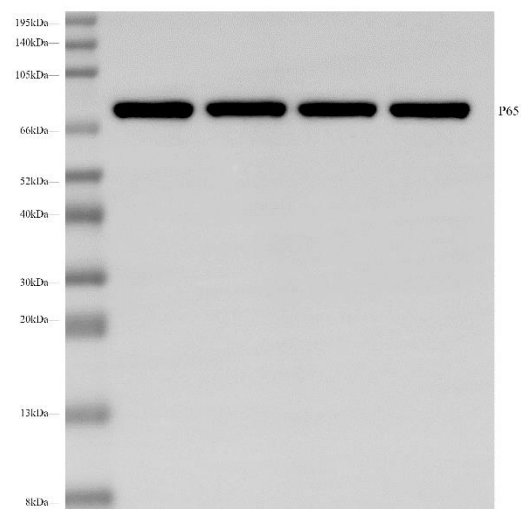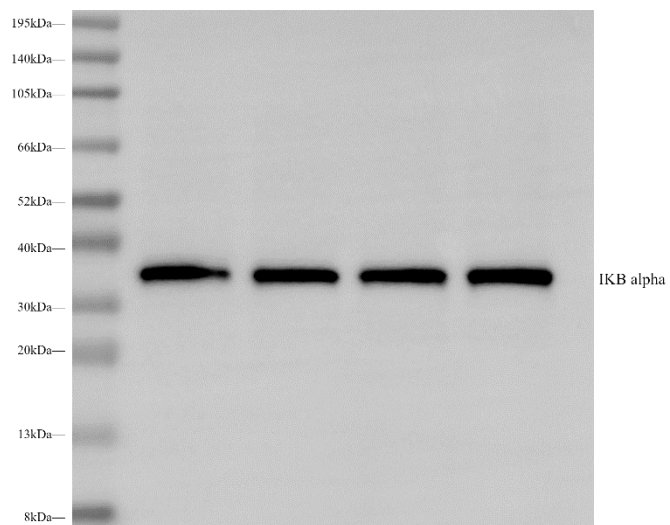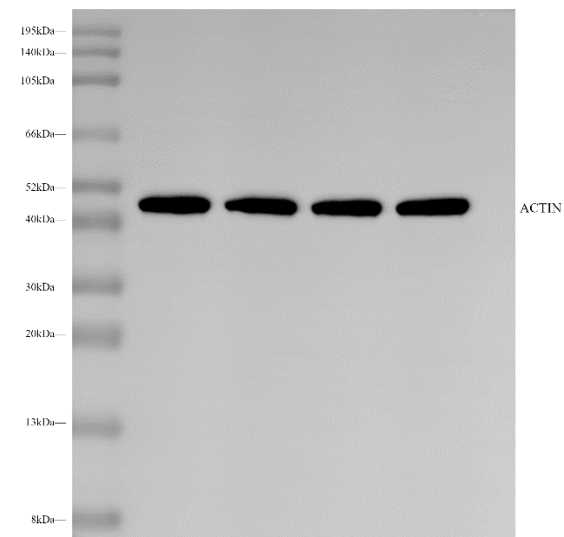



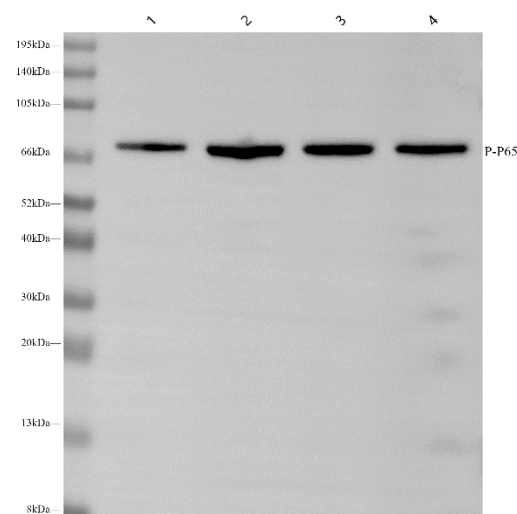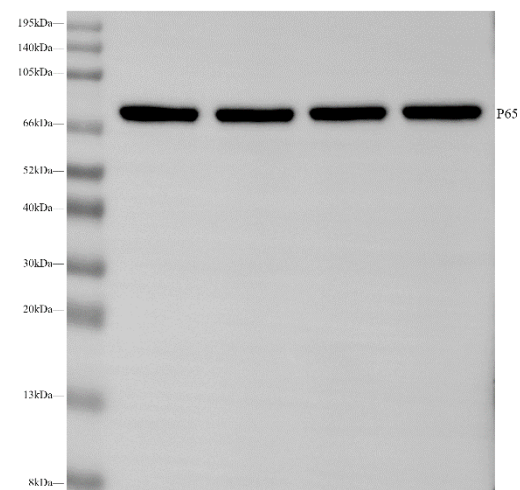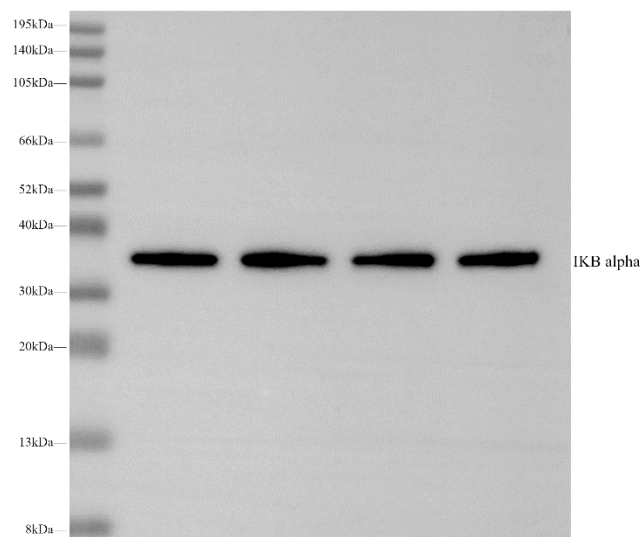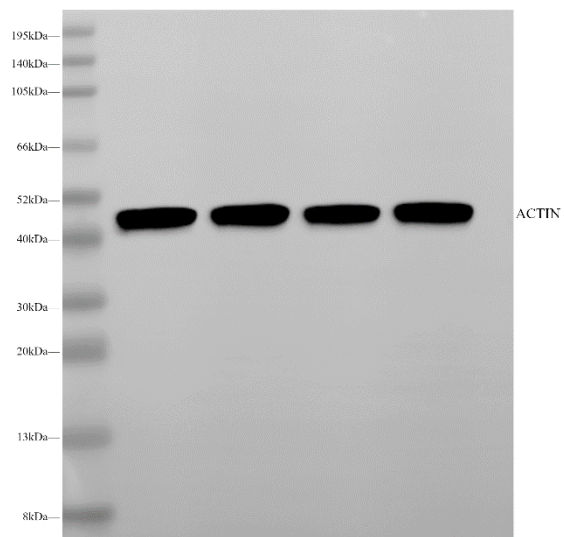



**Raw data: P-IKB alpha (n = 3)**

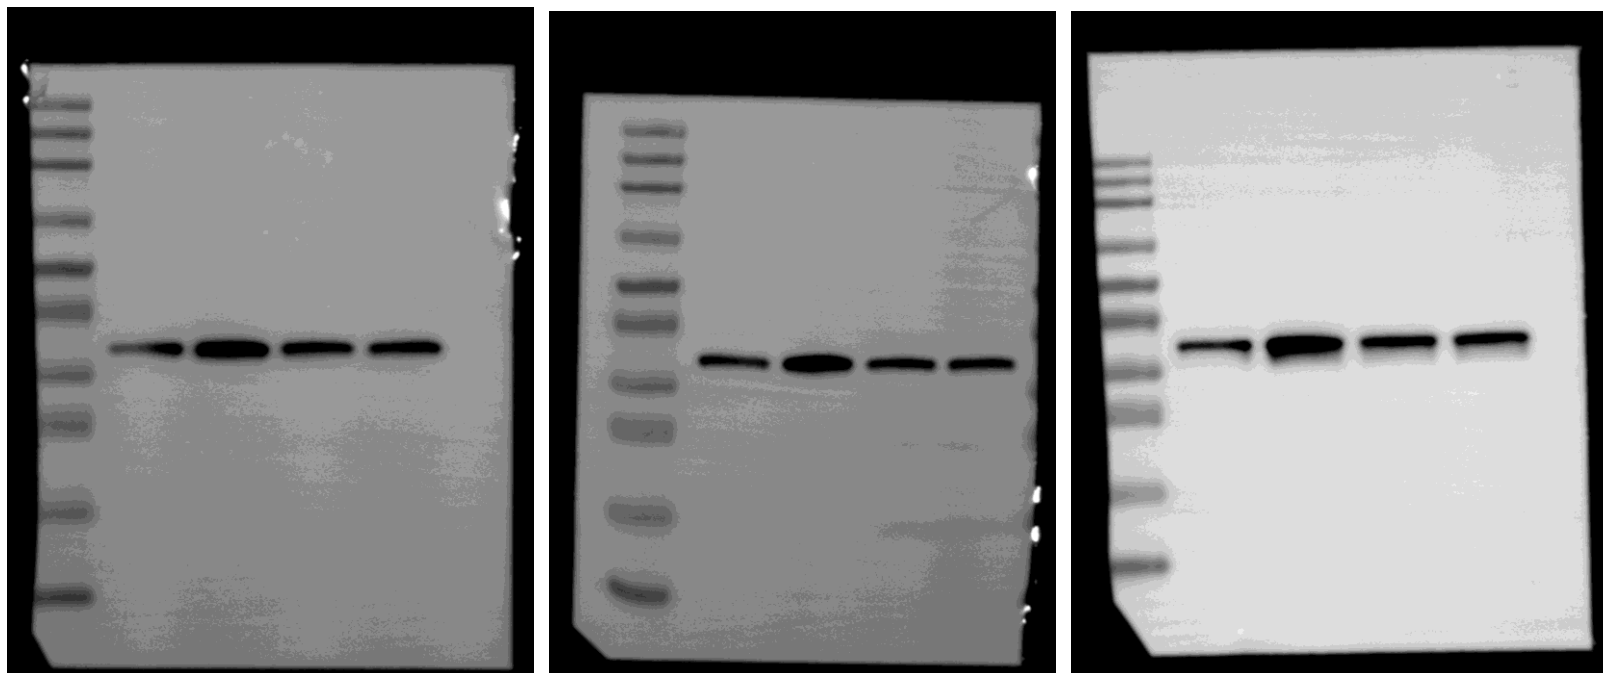

**Raw data: IKB alpha (n = 3)**

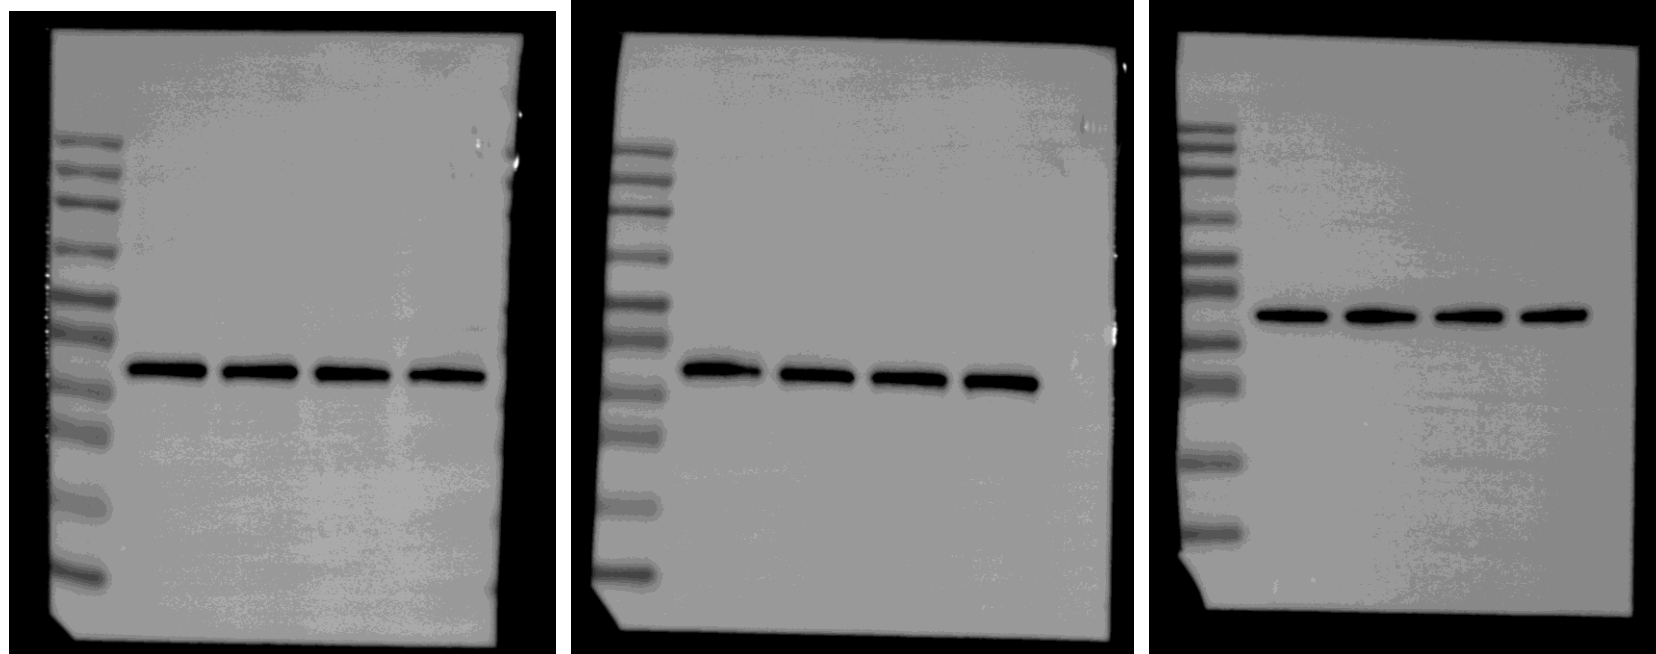

Raw data: P65 (n = 3)

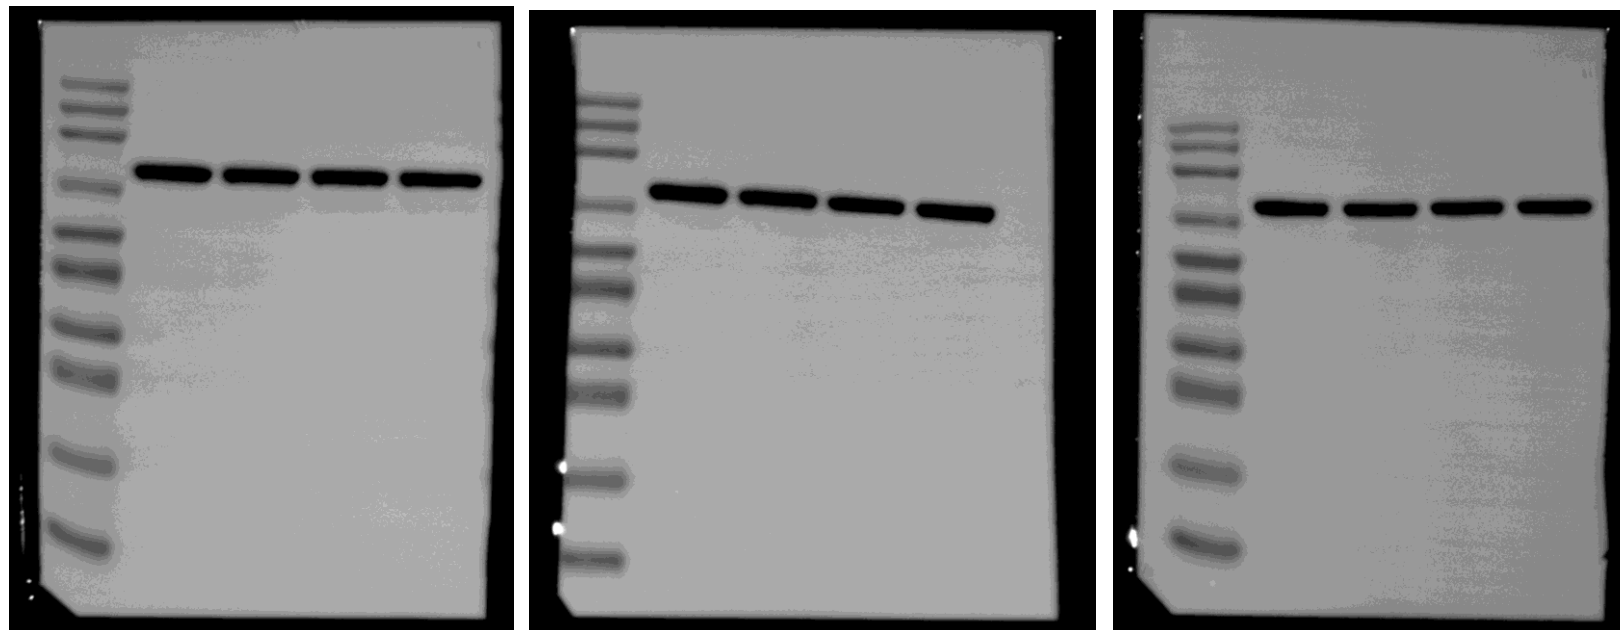

Raw data: P-P65 (n = 3)

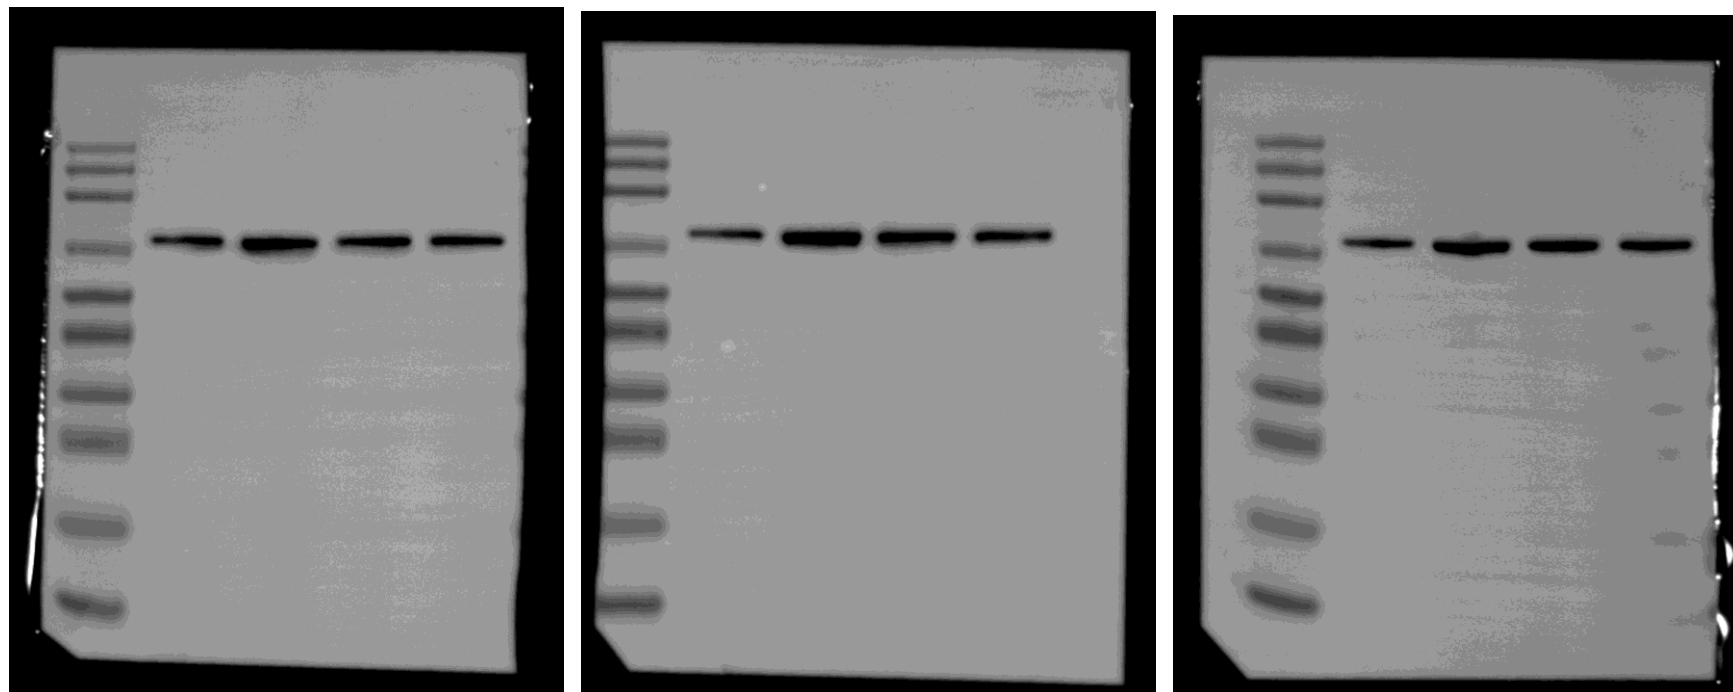

**Raw data: ACTIN (n = 3)**

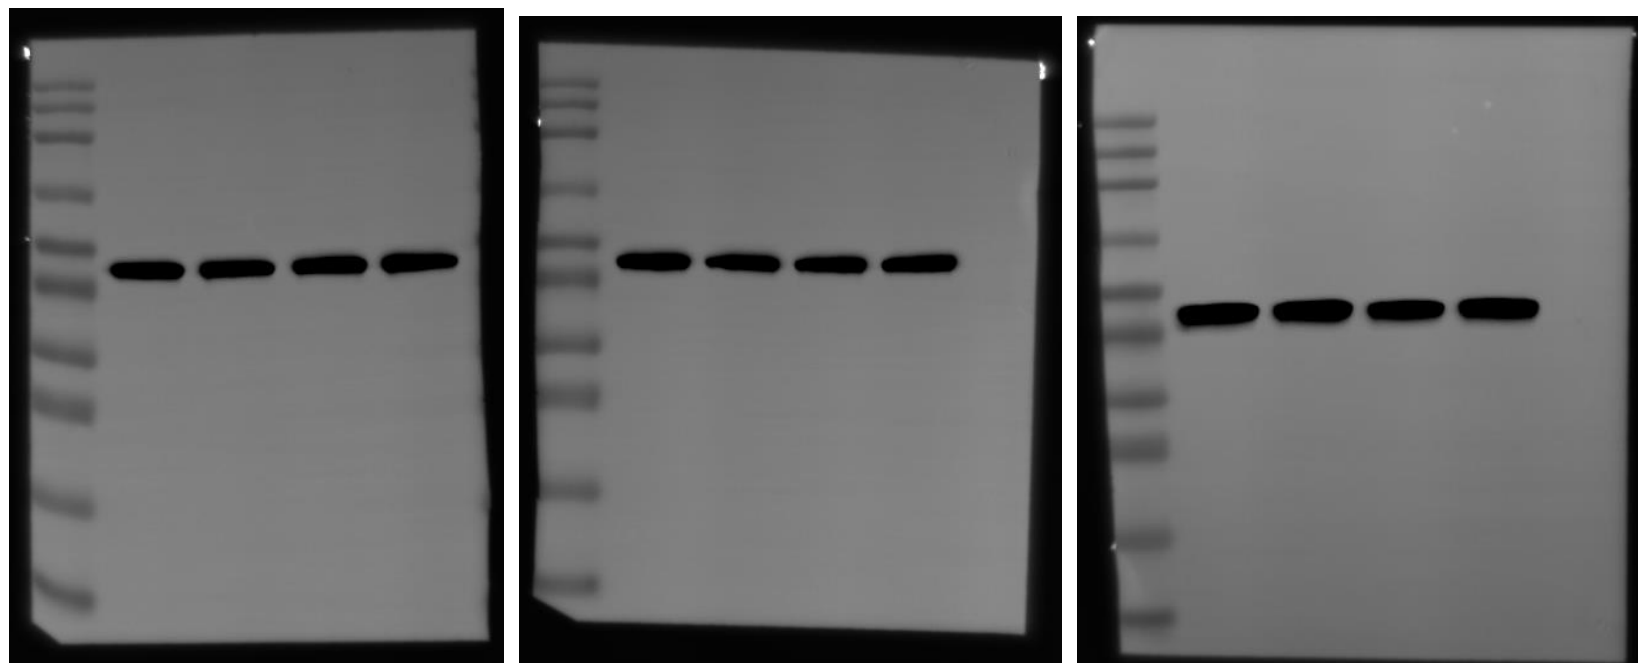

## 7. NMR and HPLC spectra

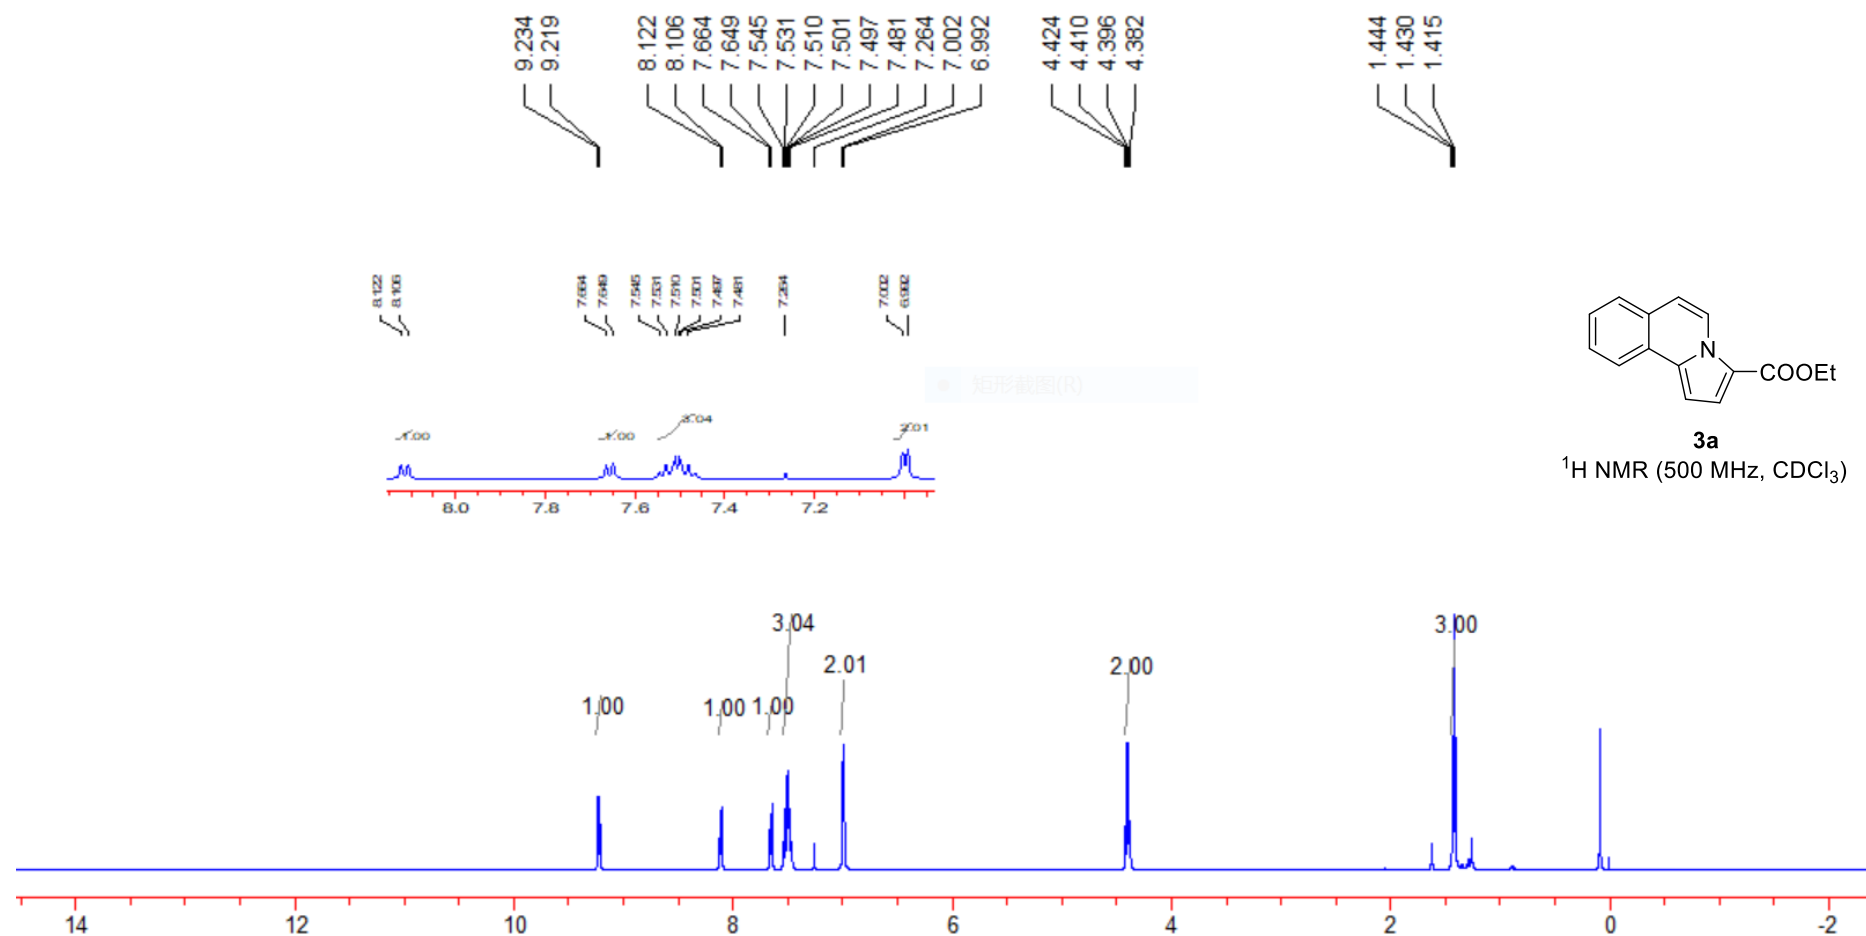

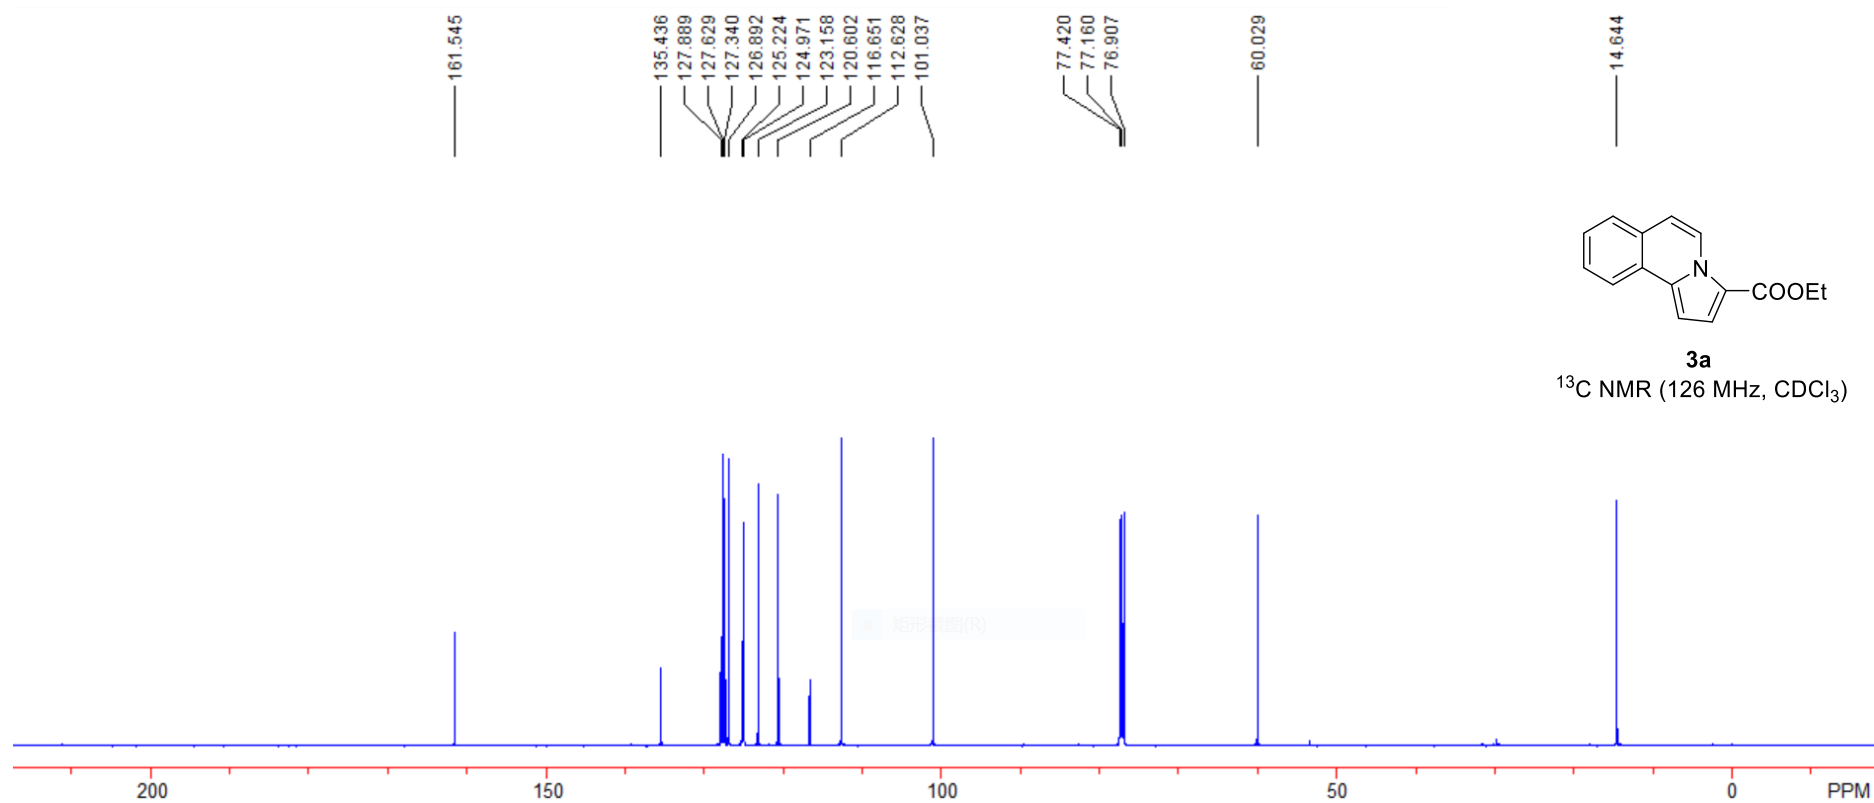

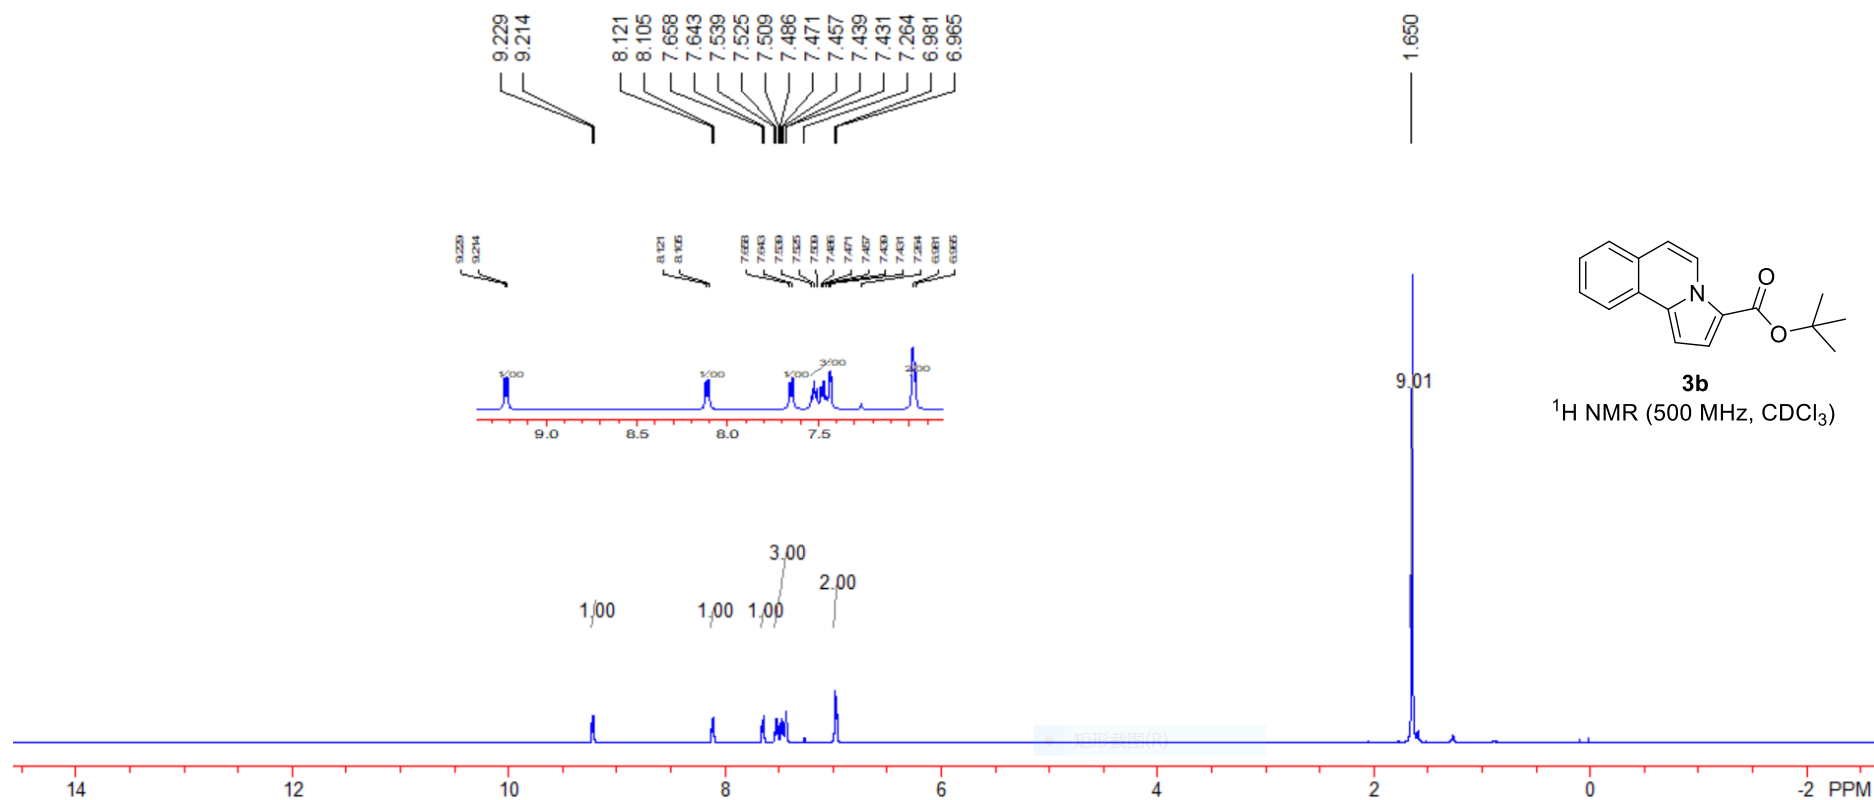



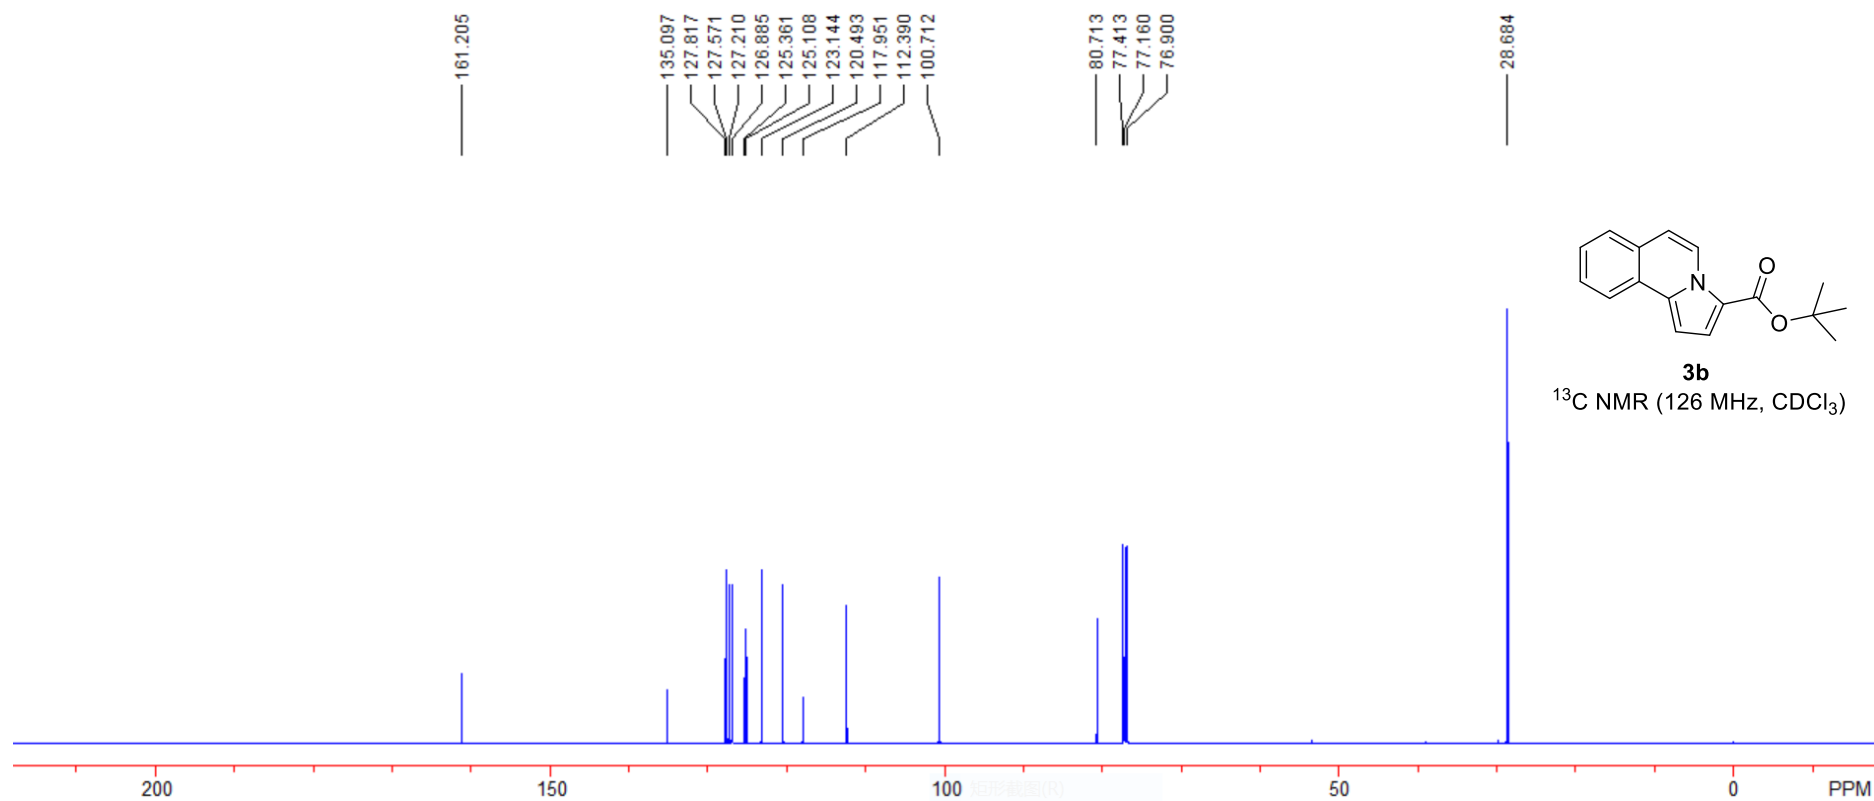

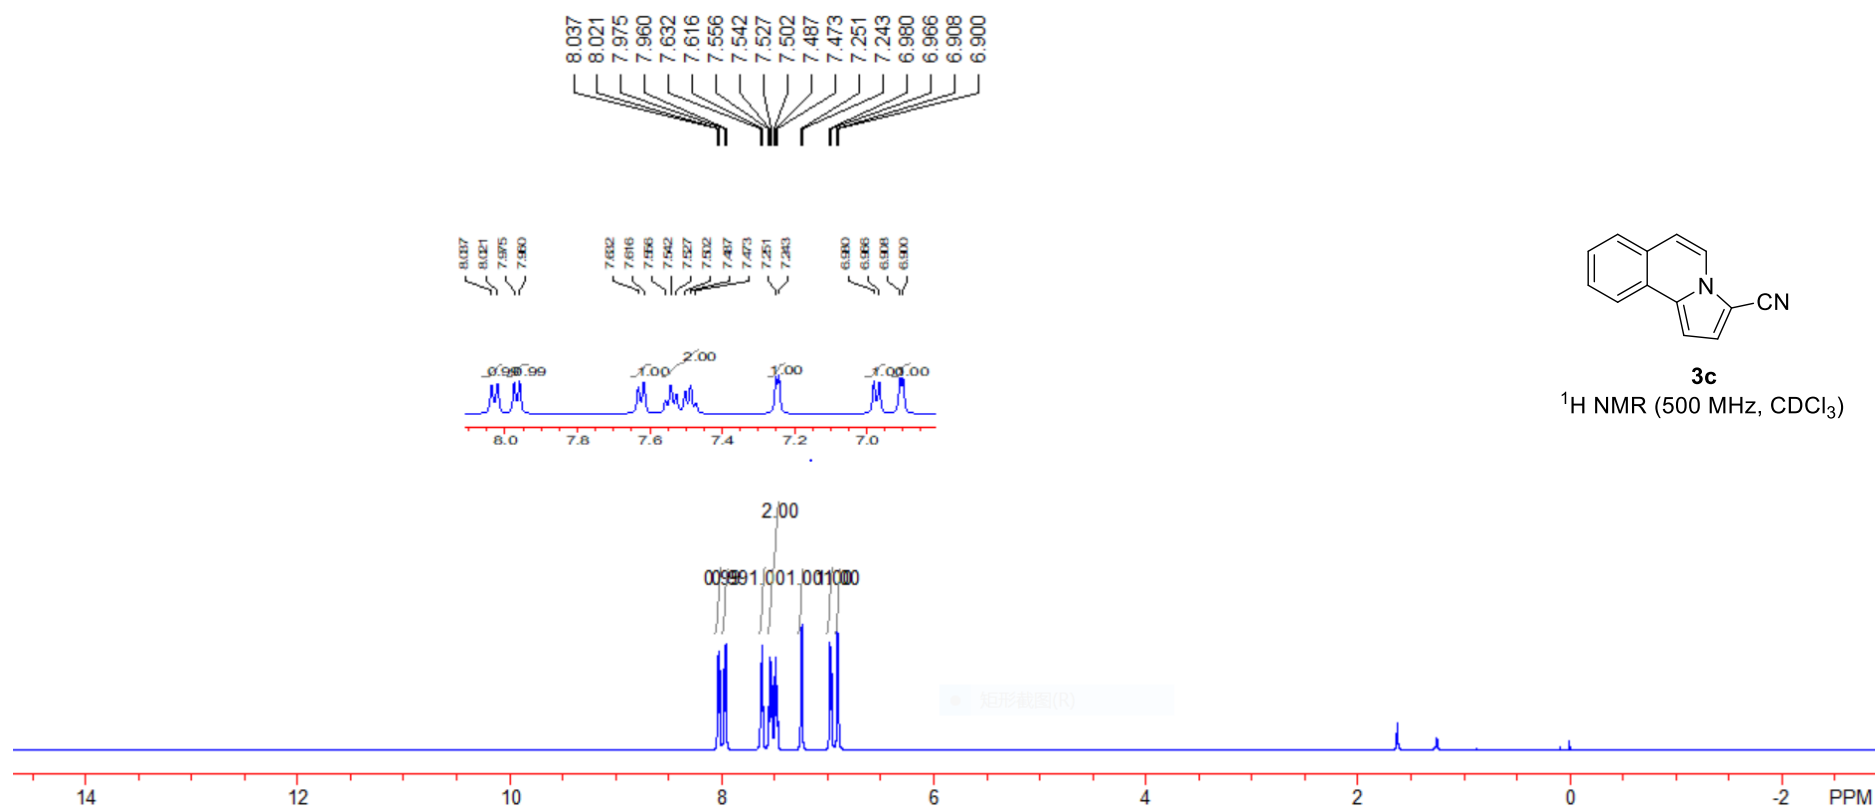

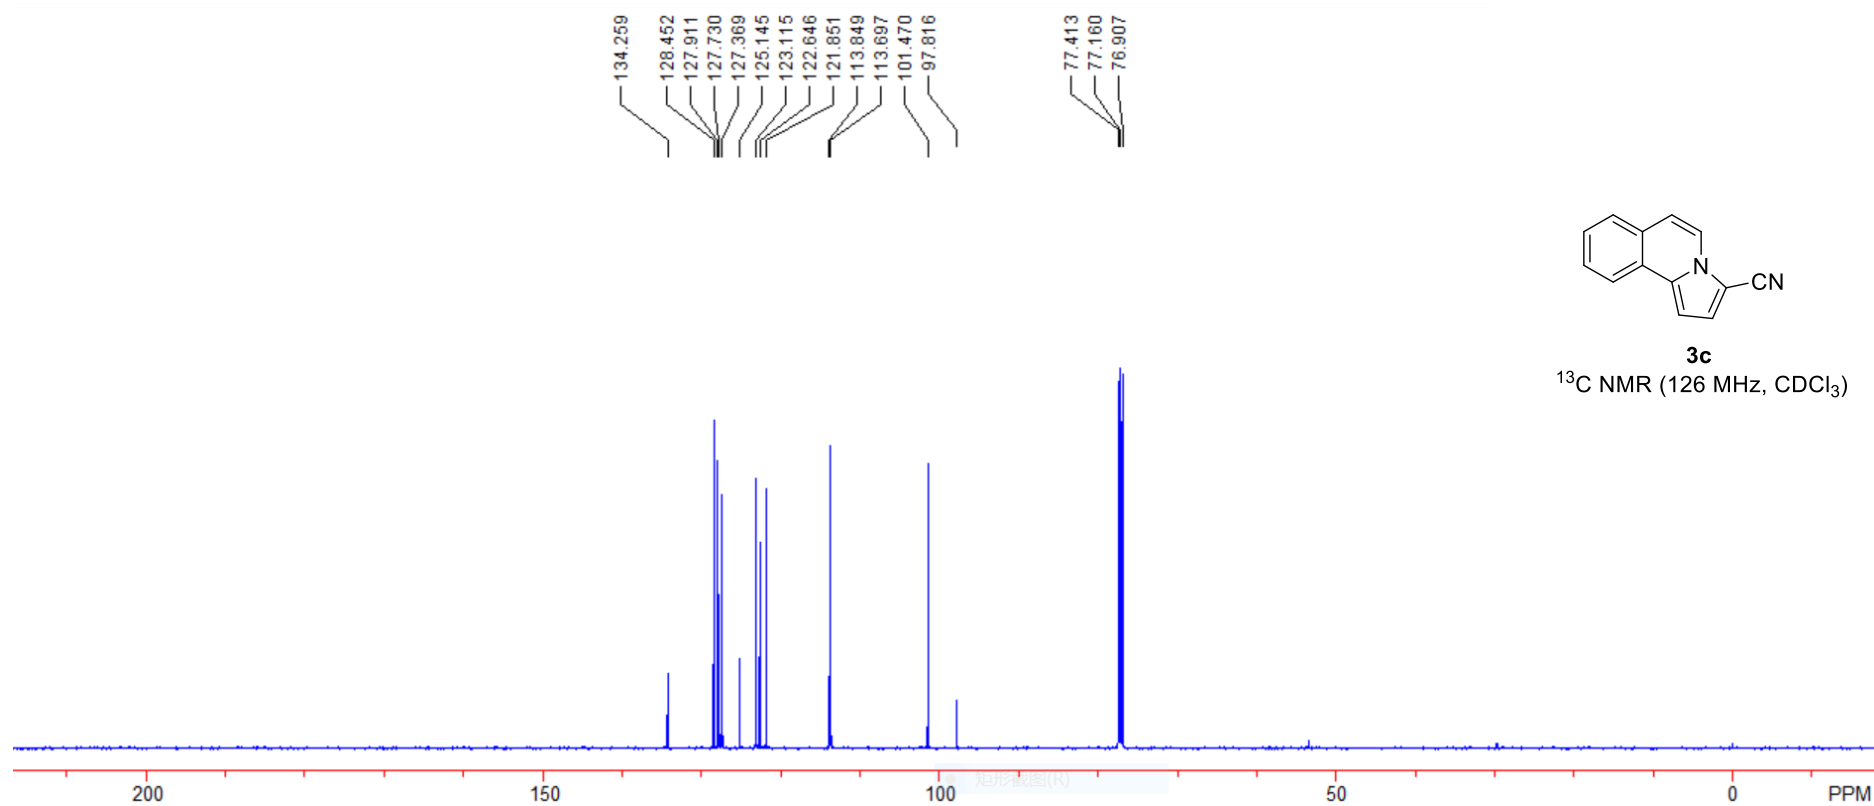

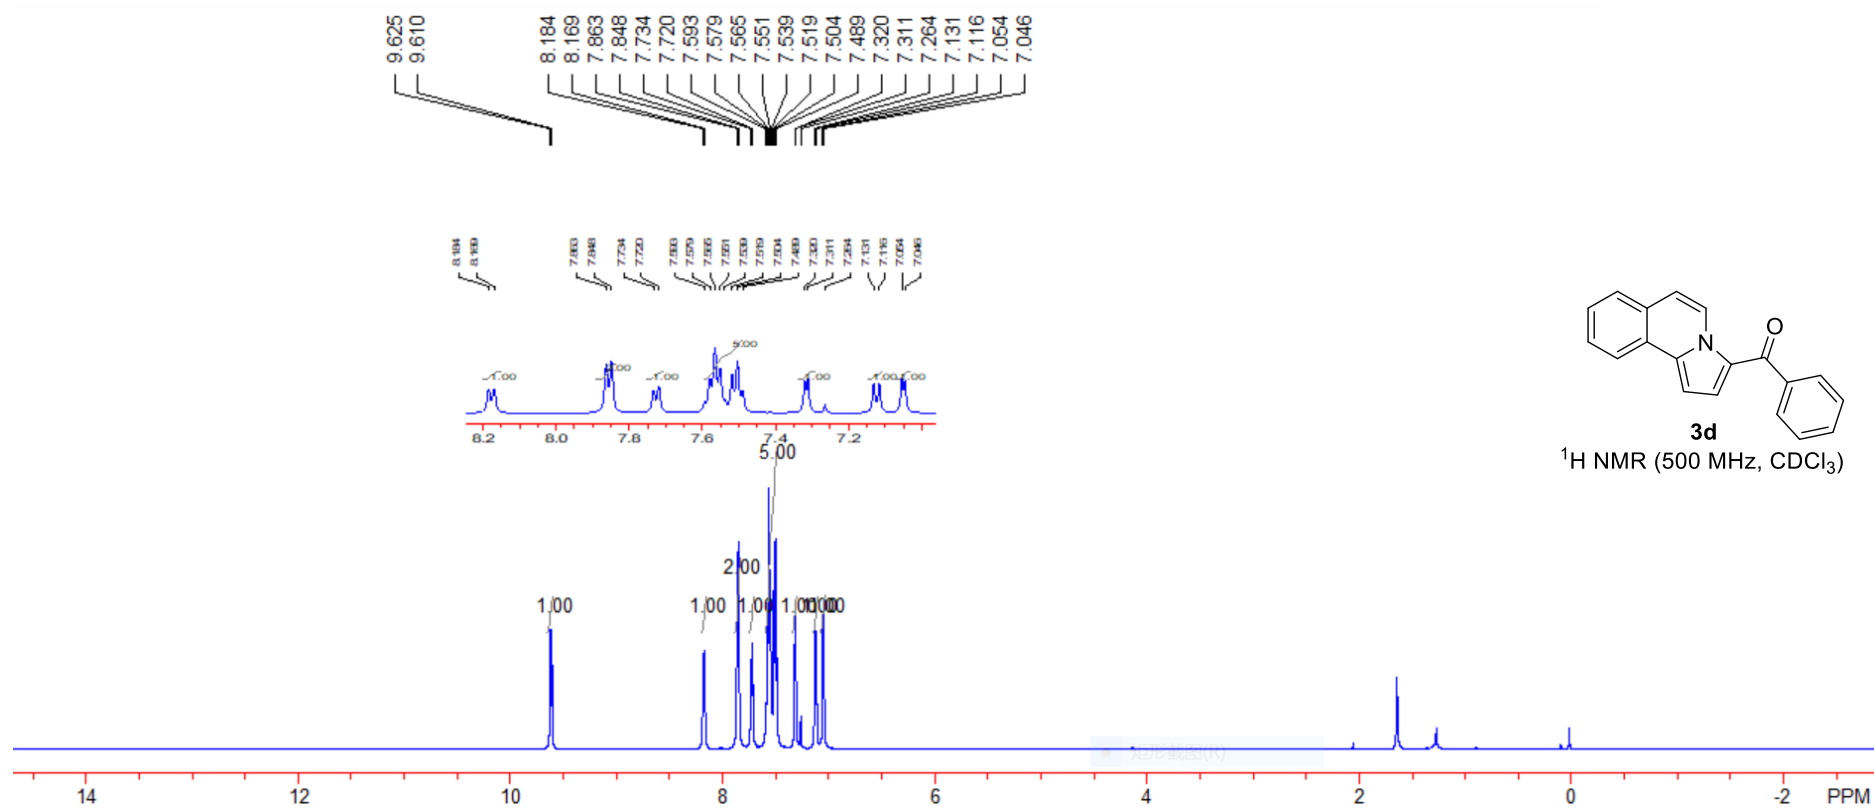

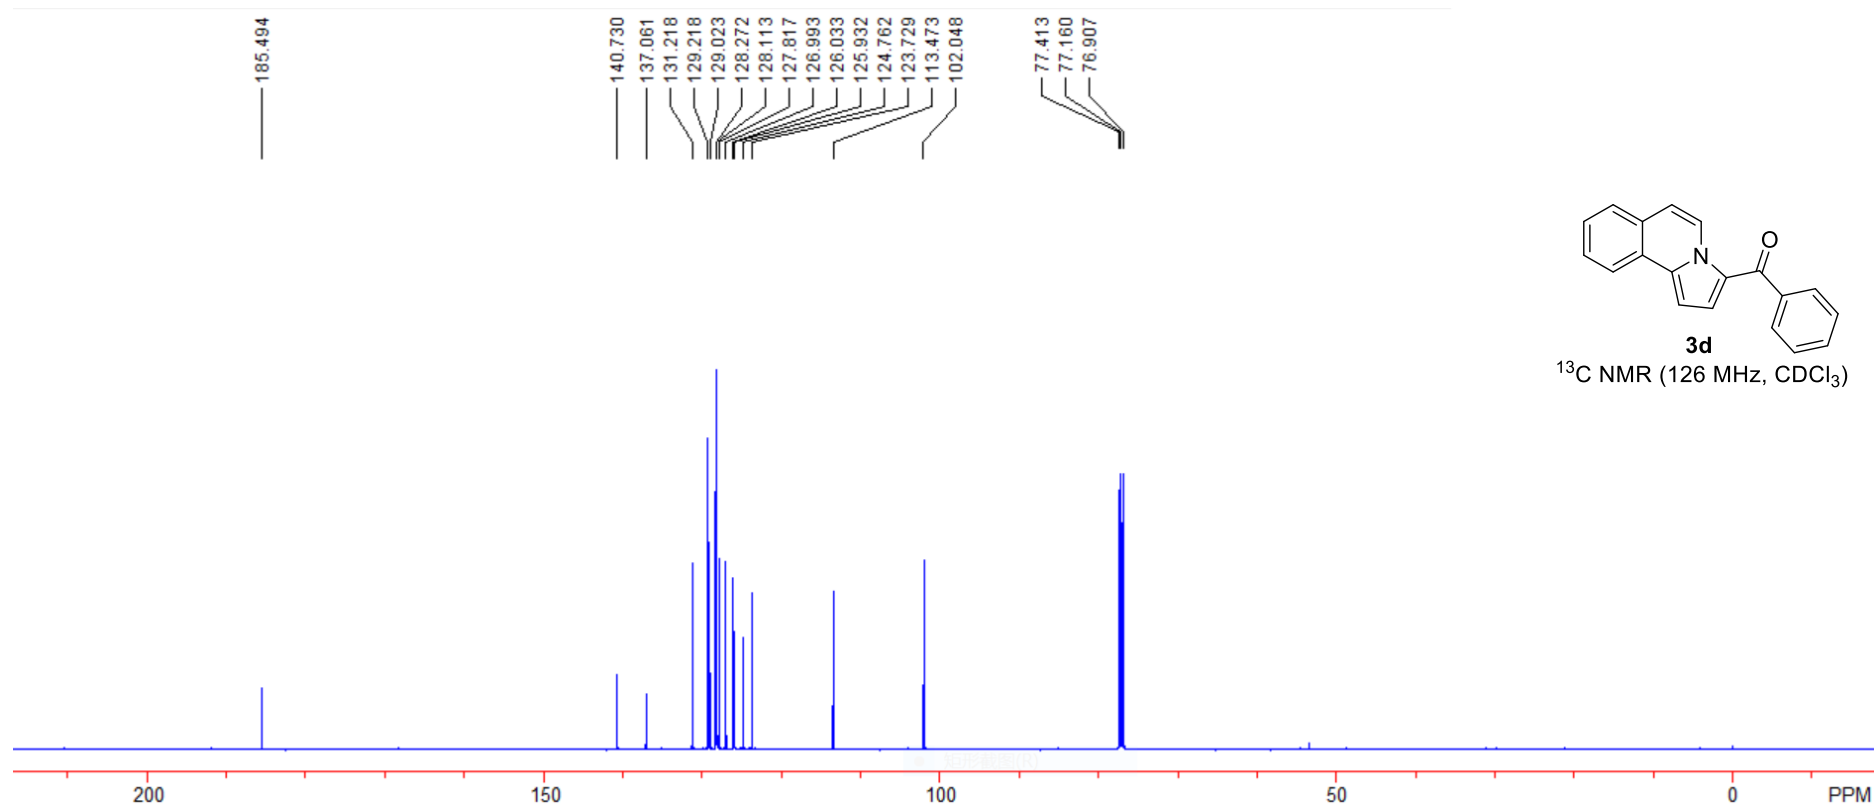



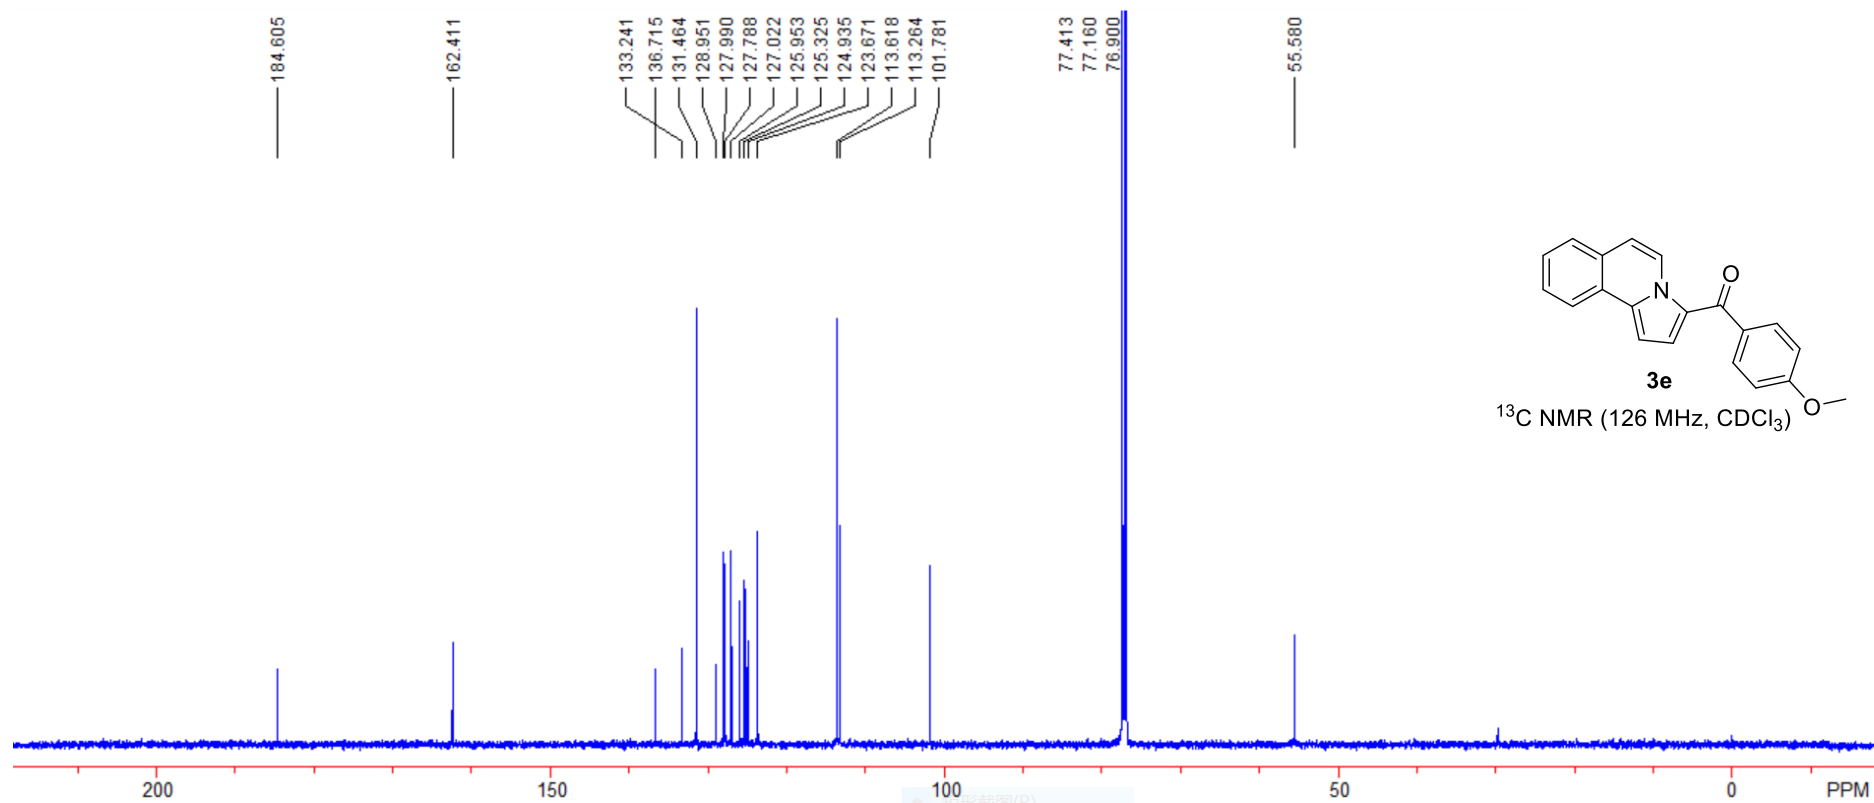

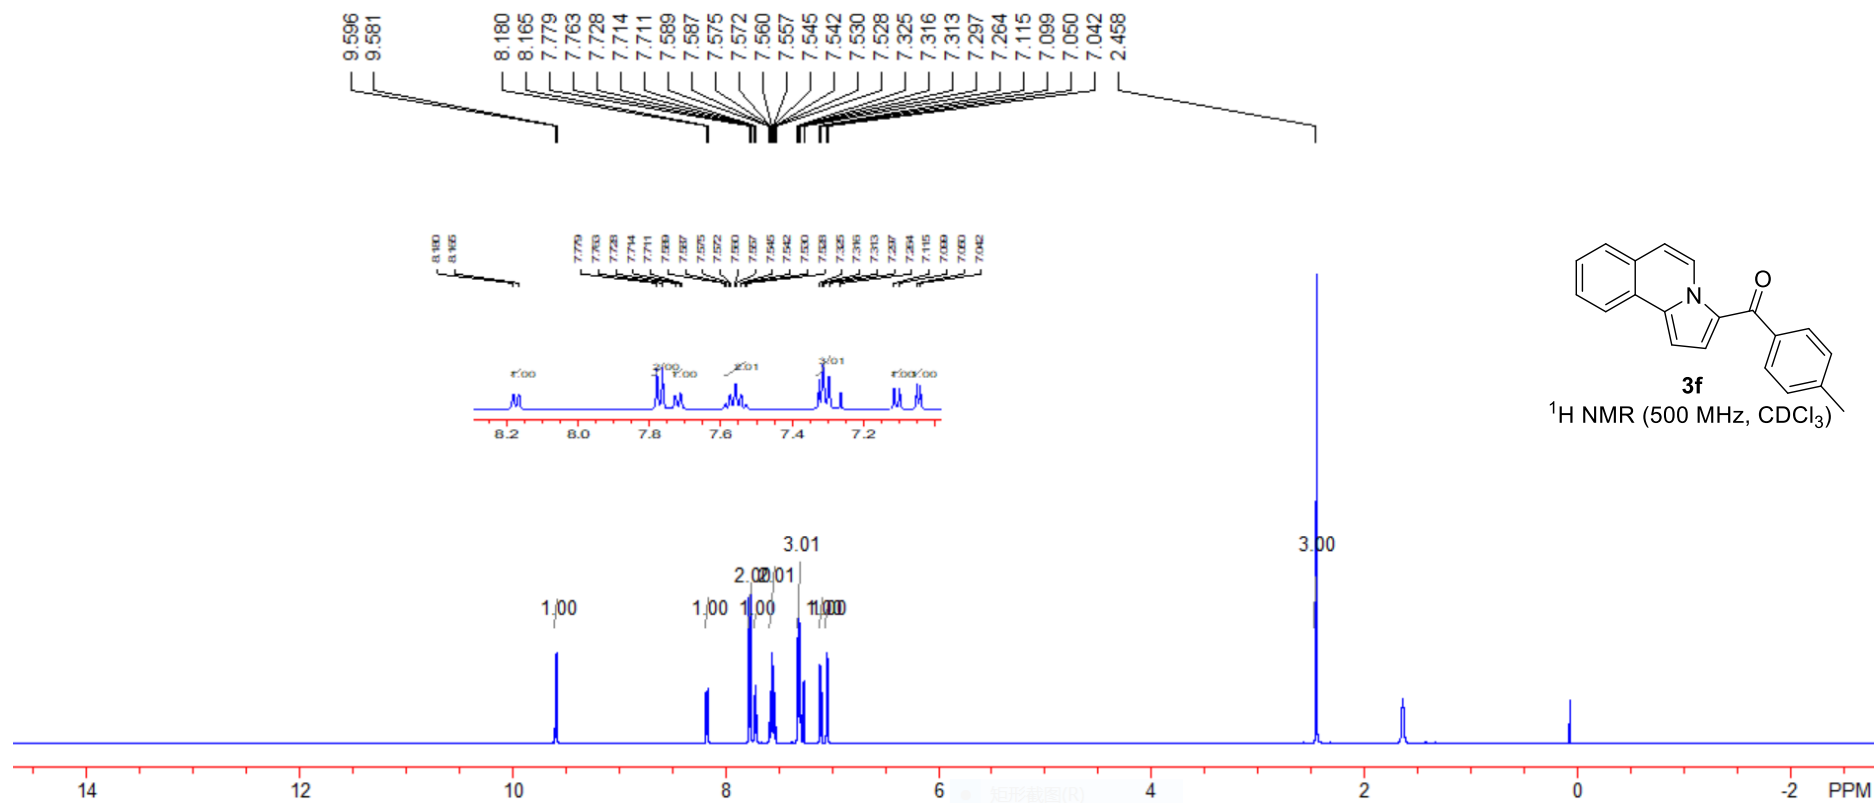



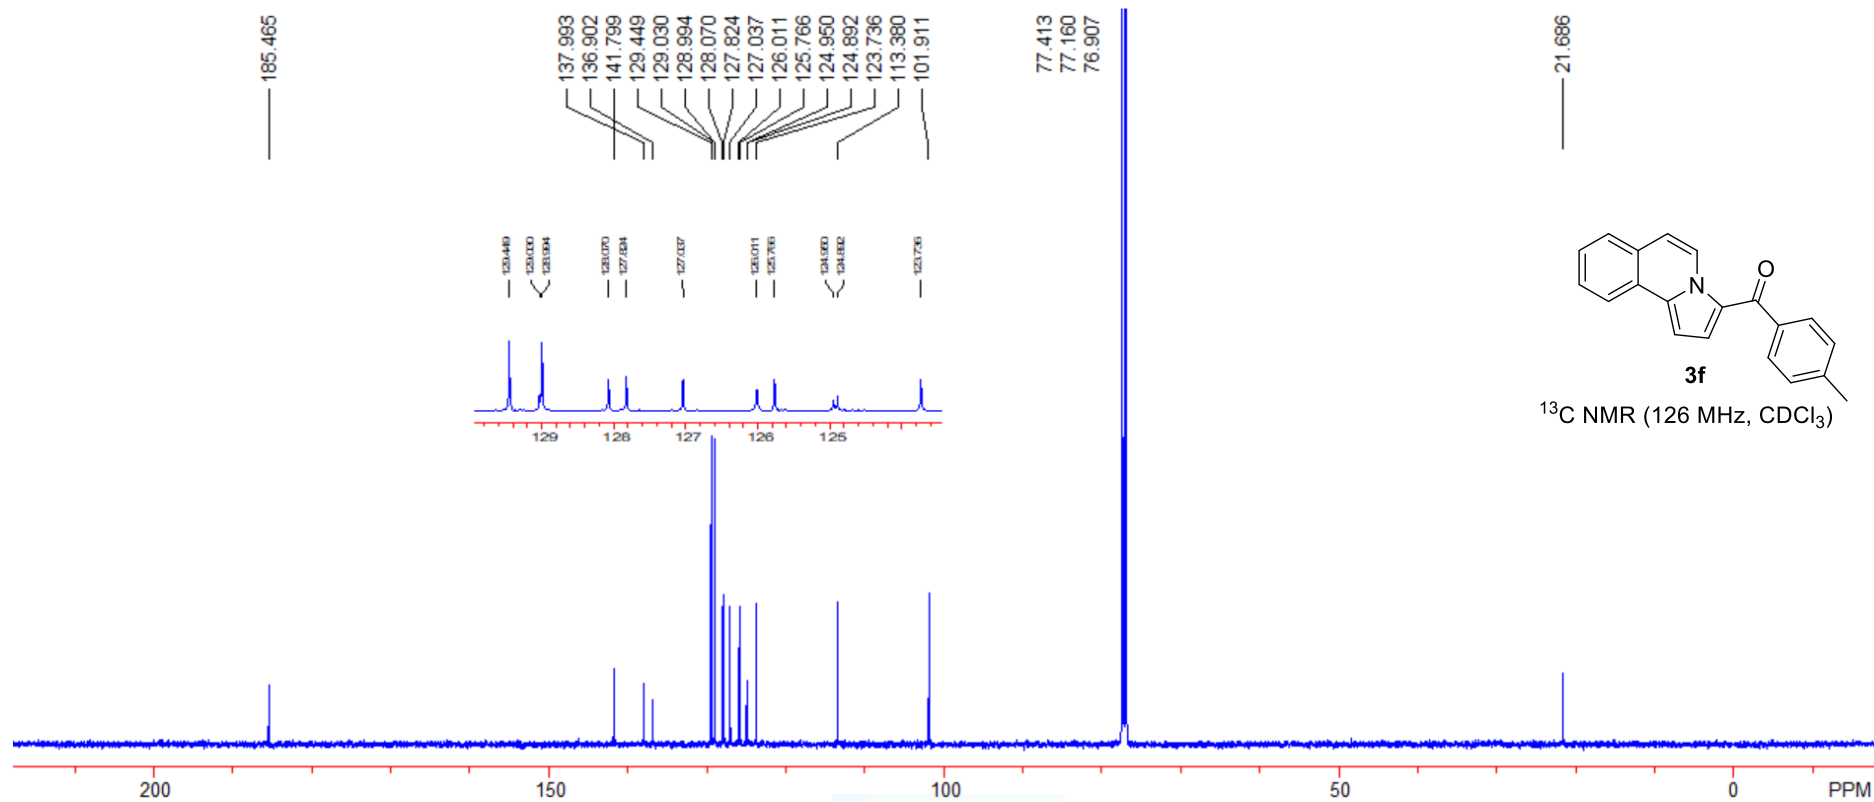

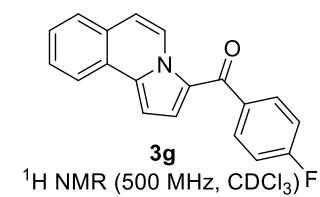

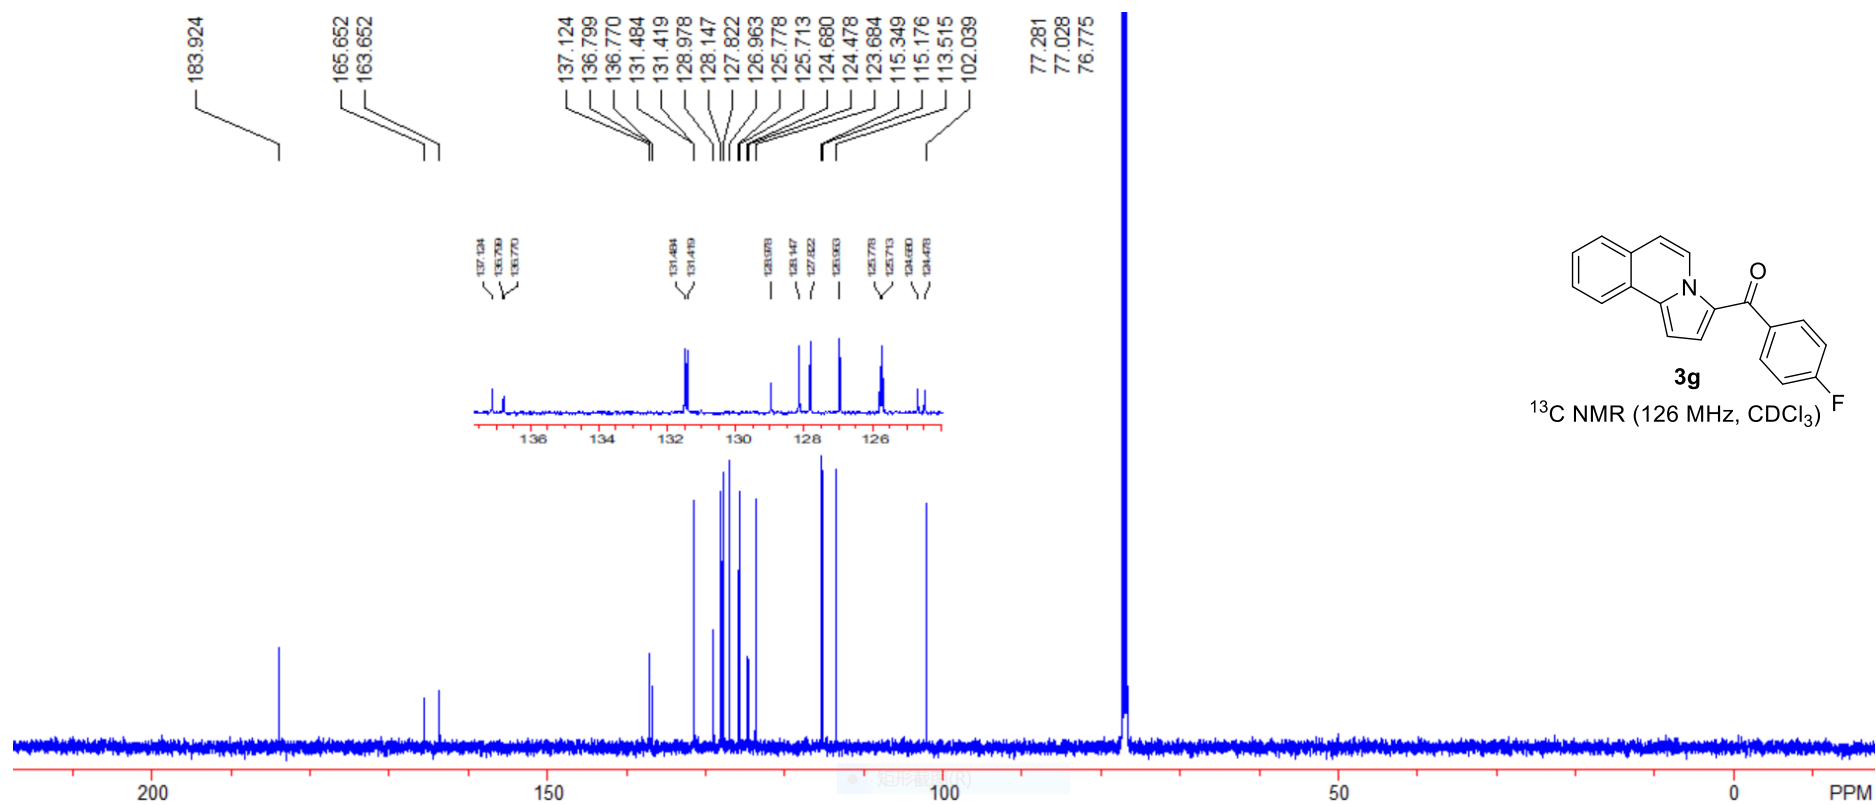

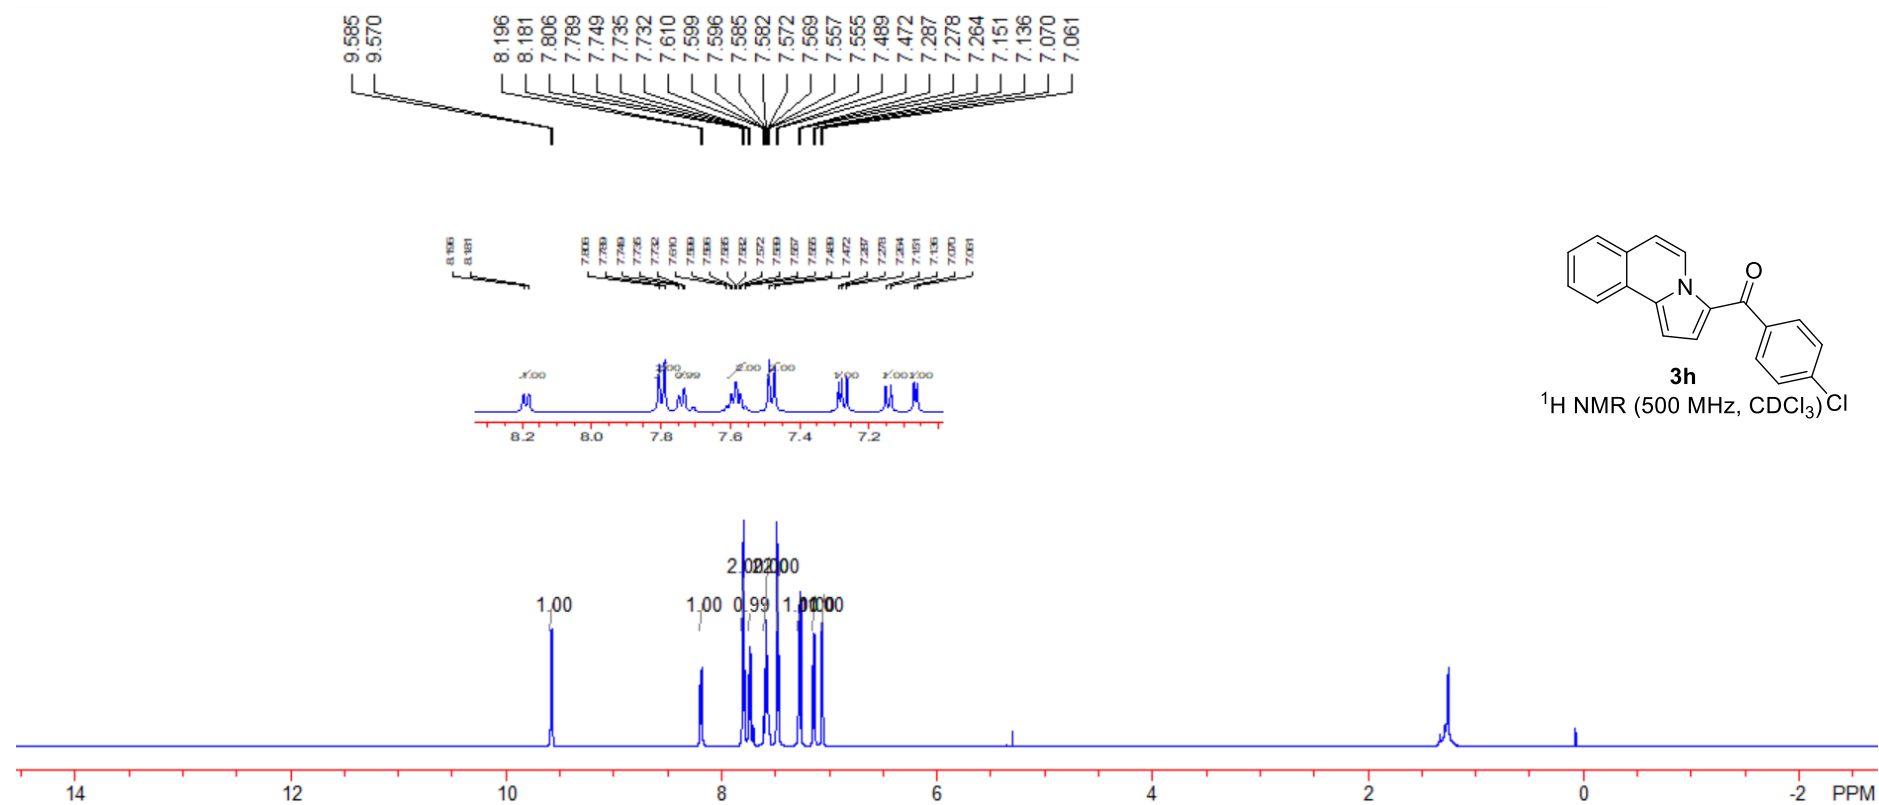

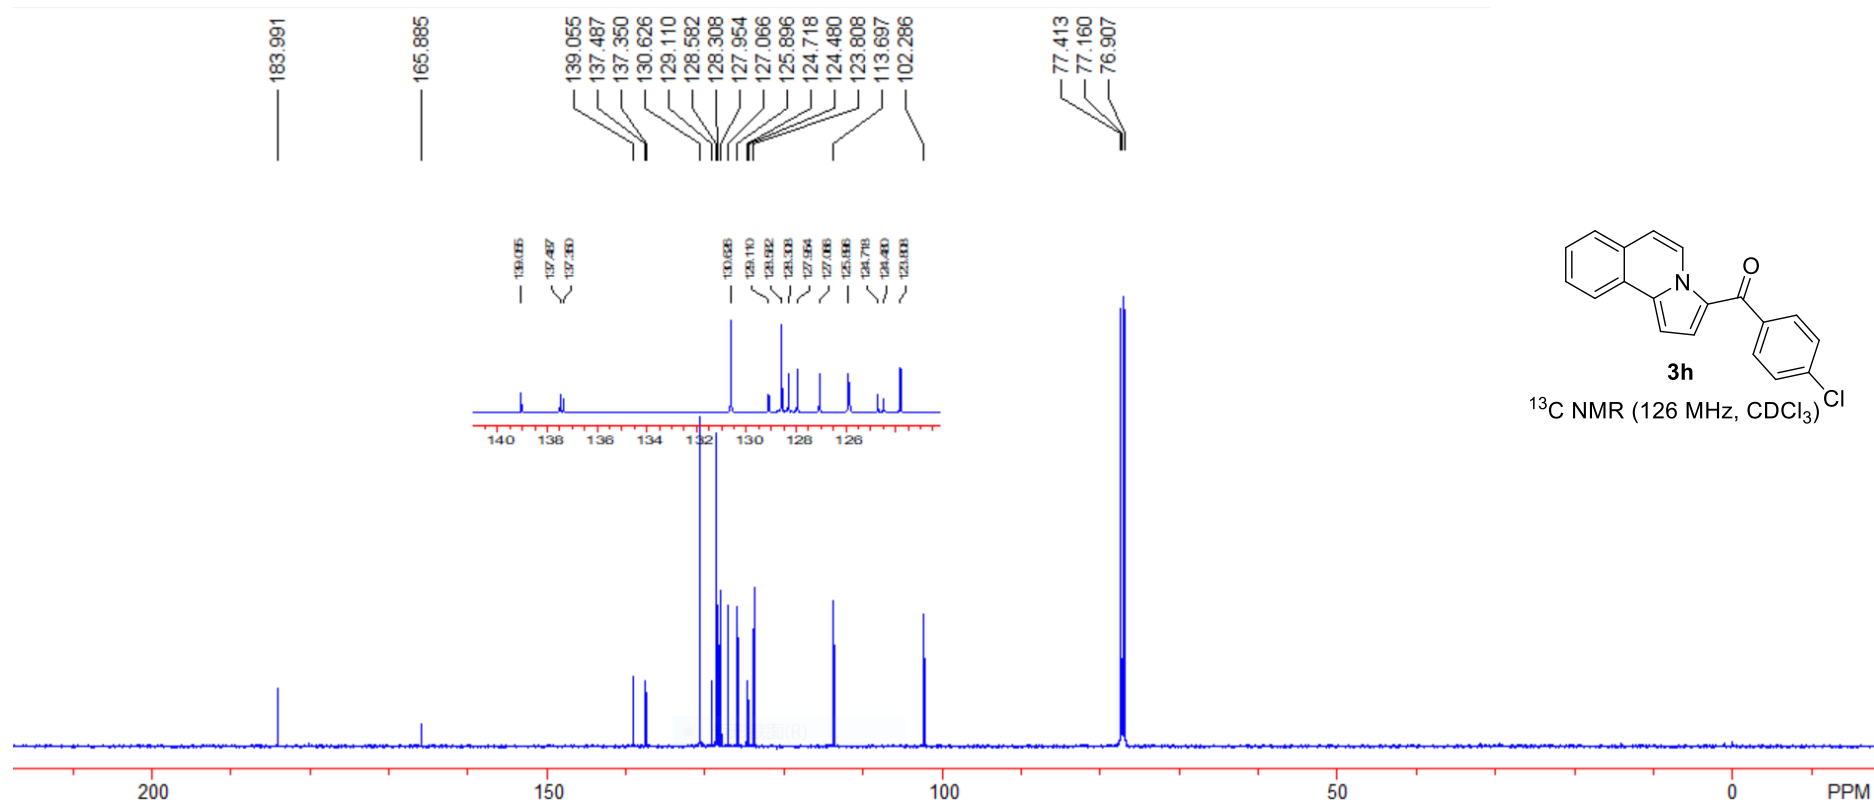

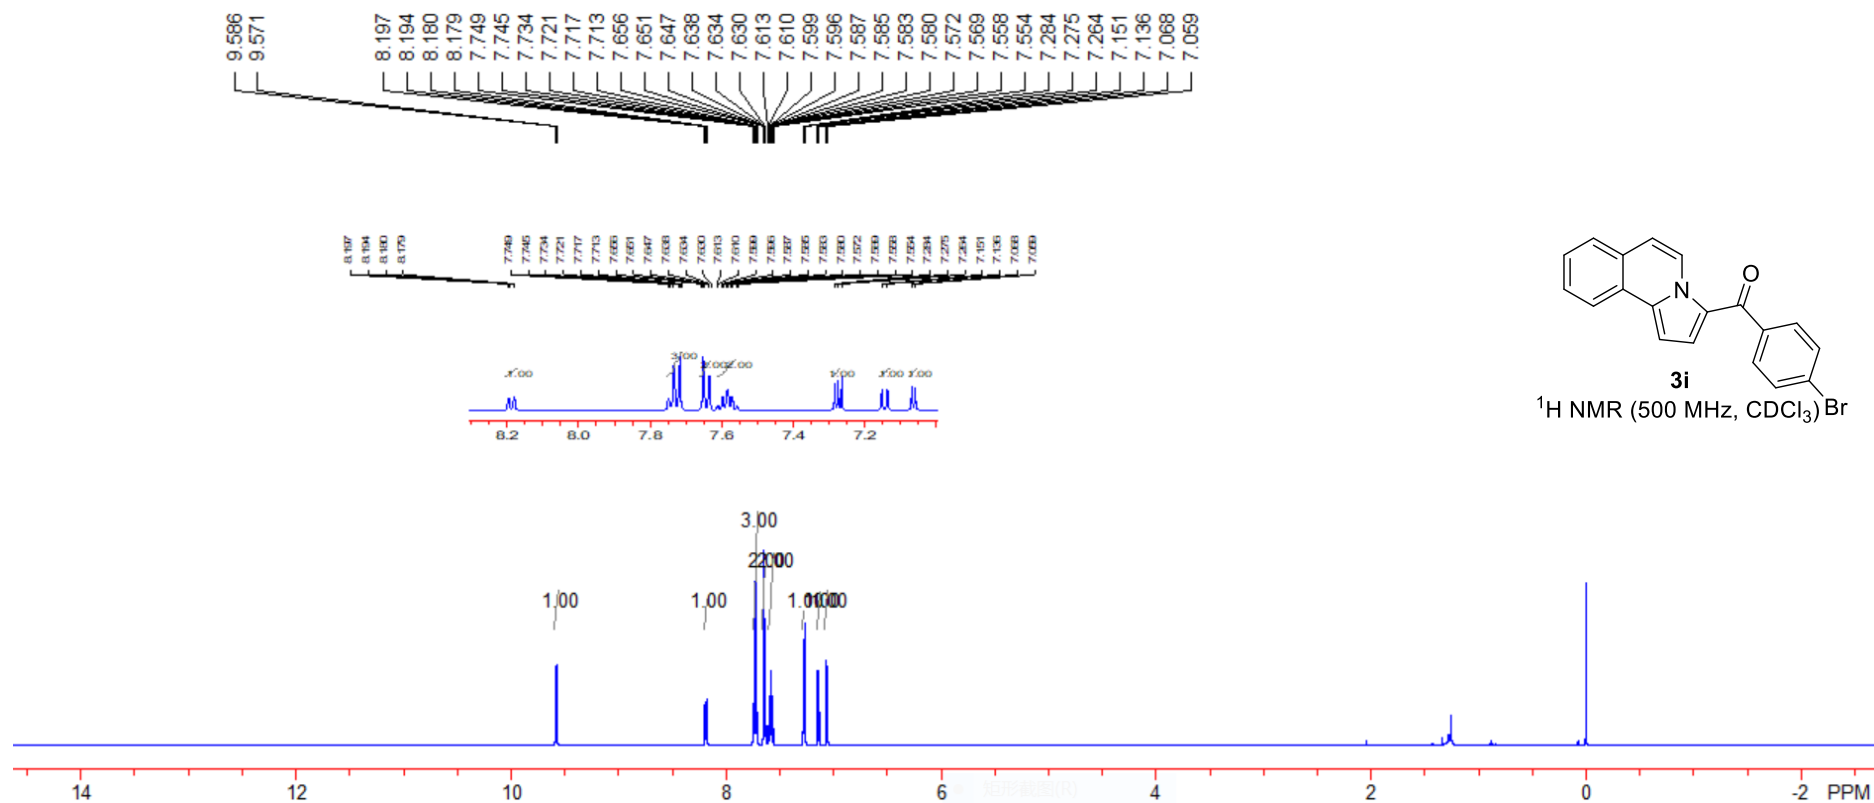

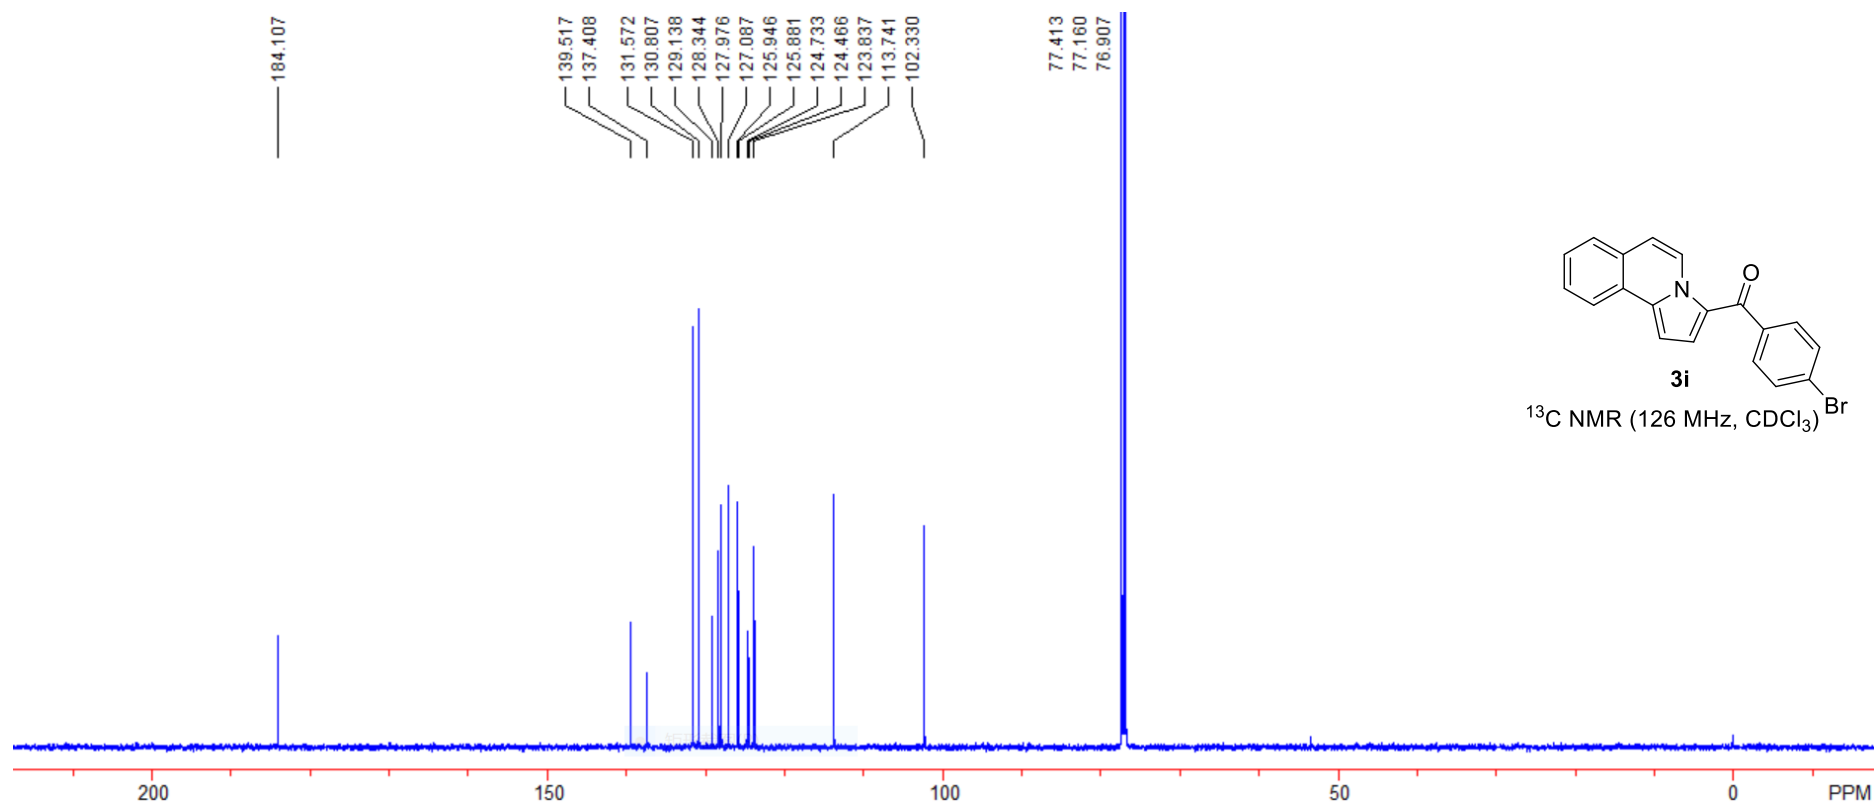

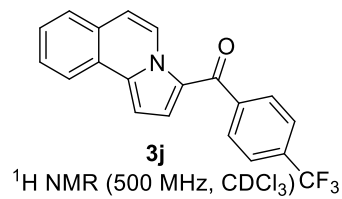



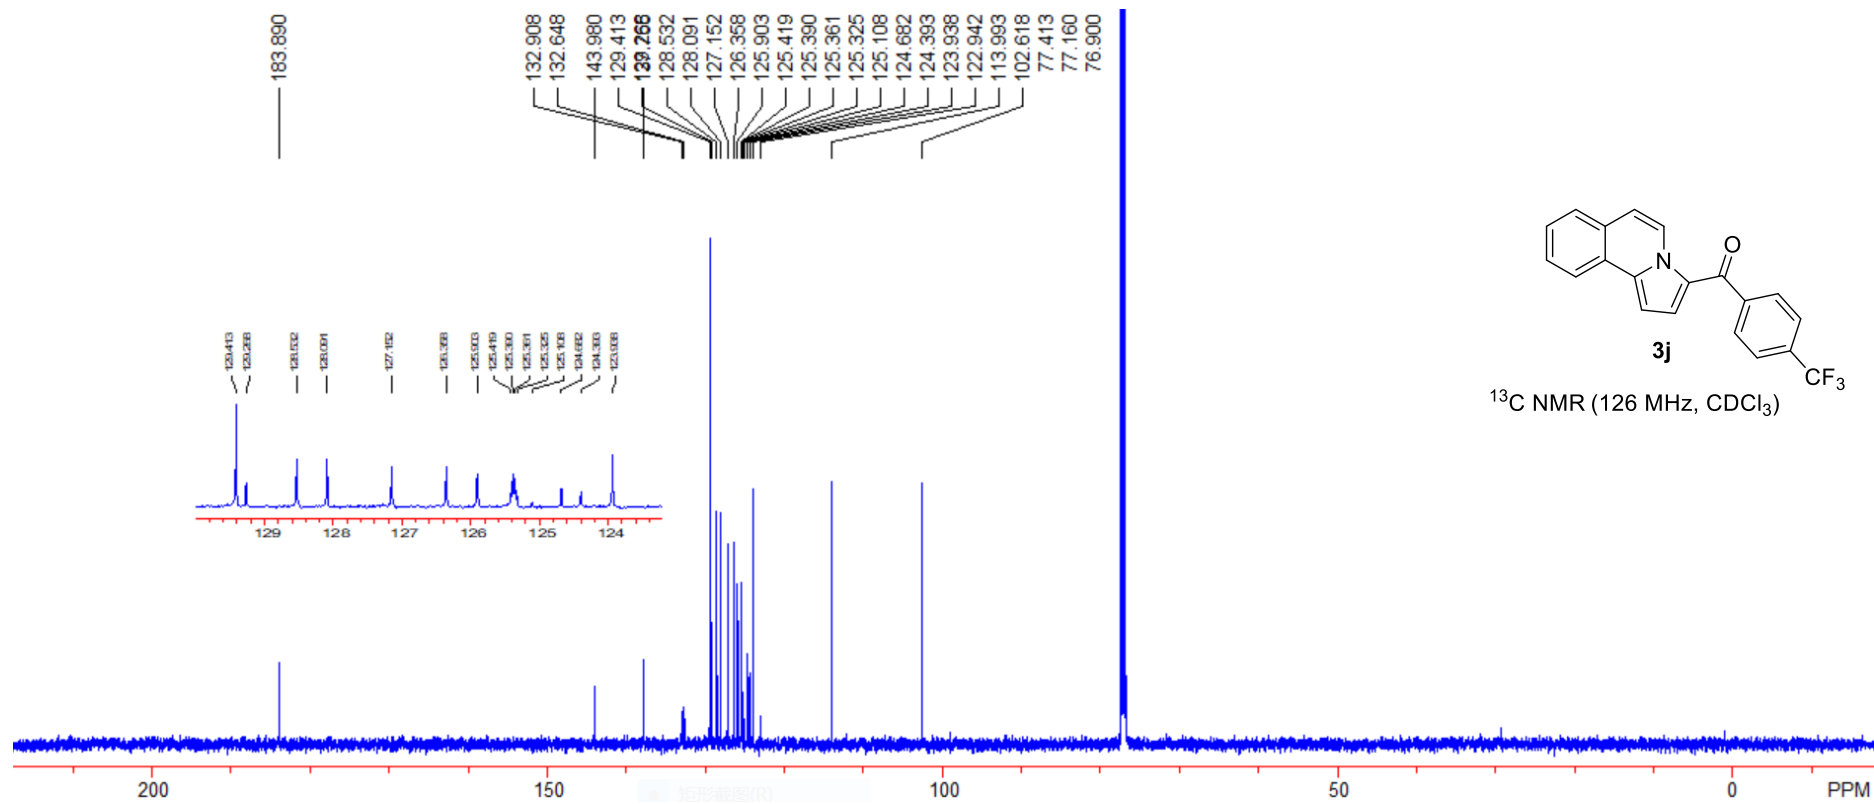

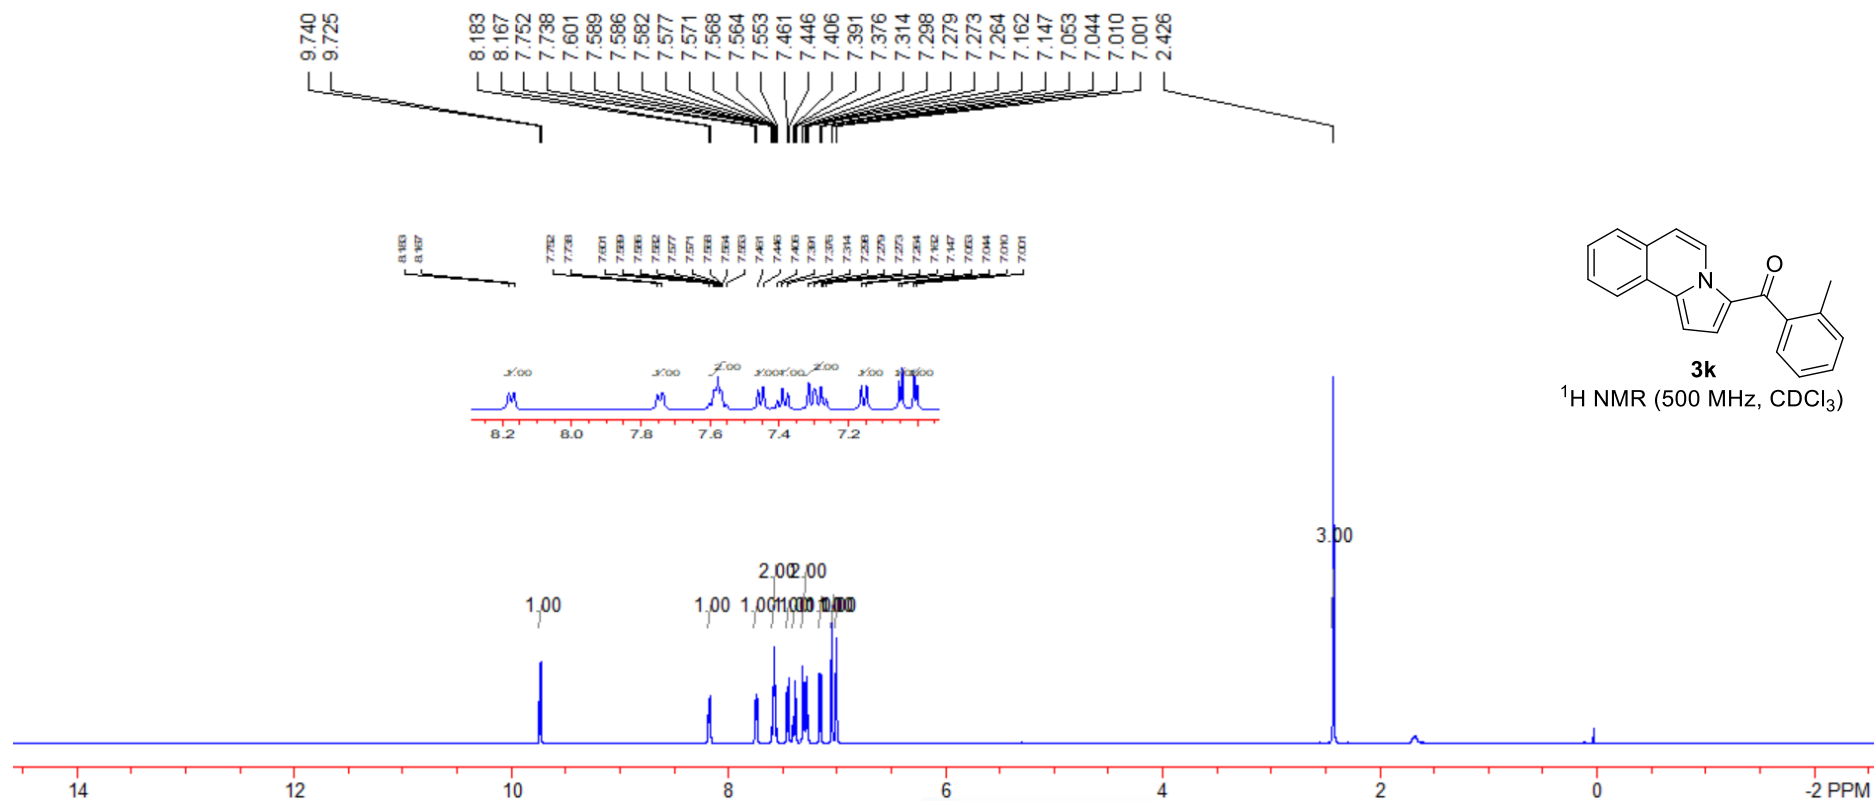

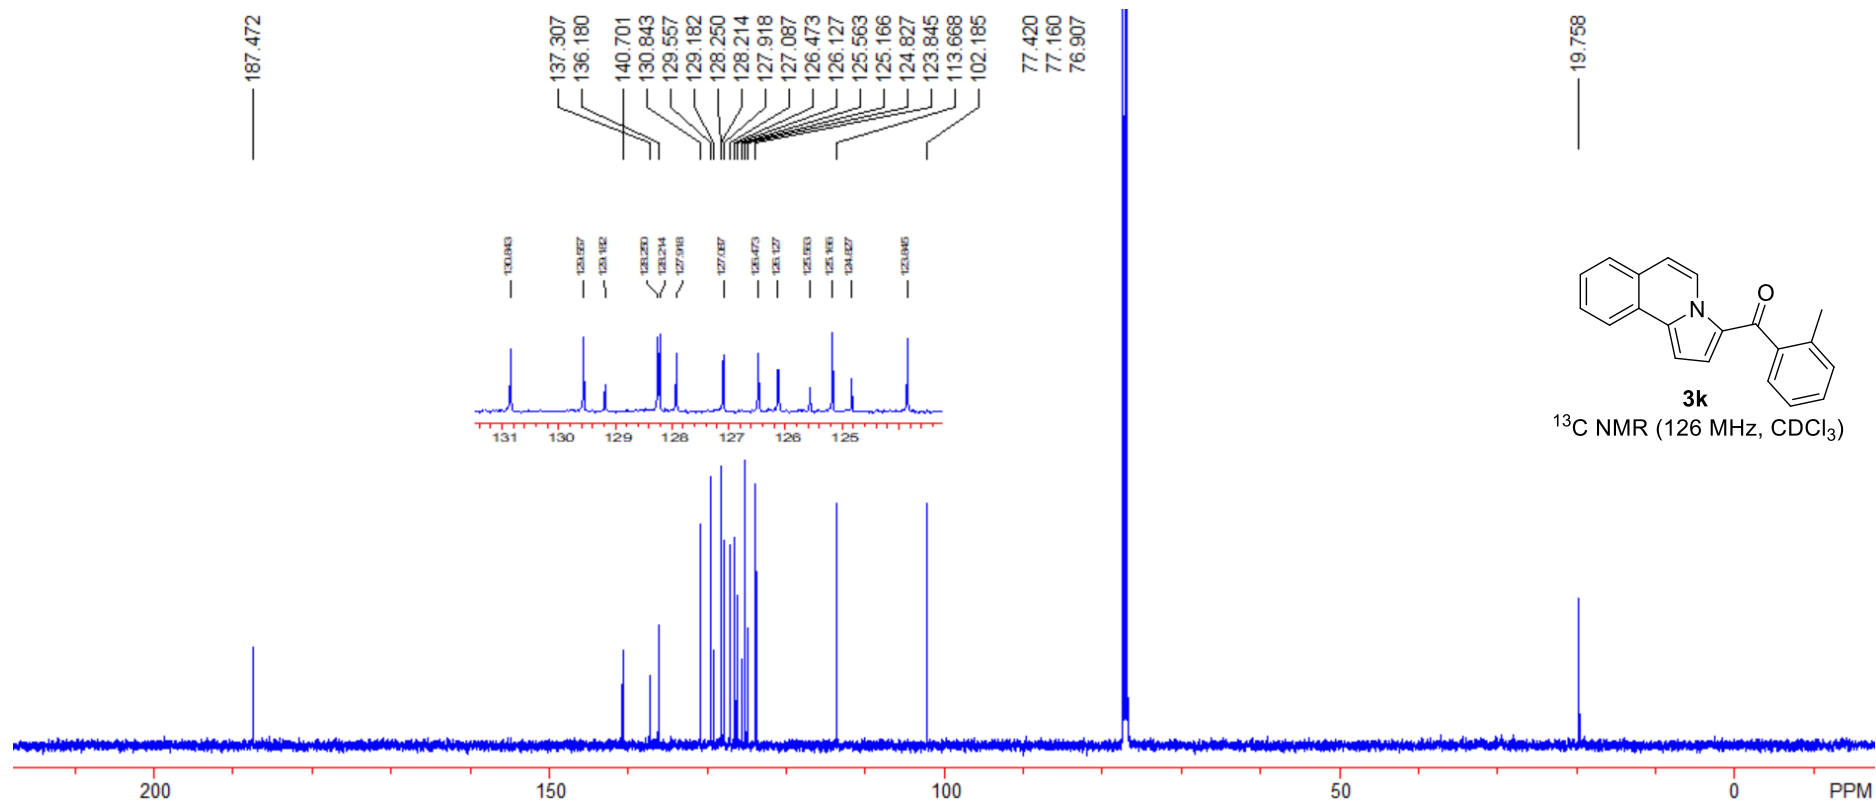

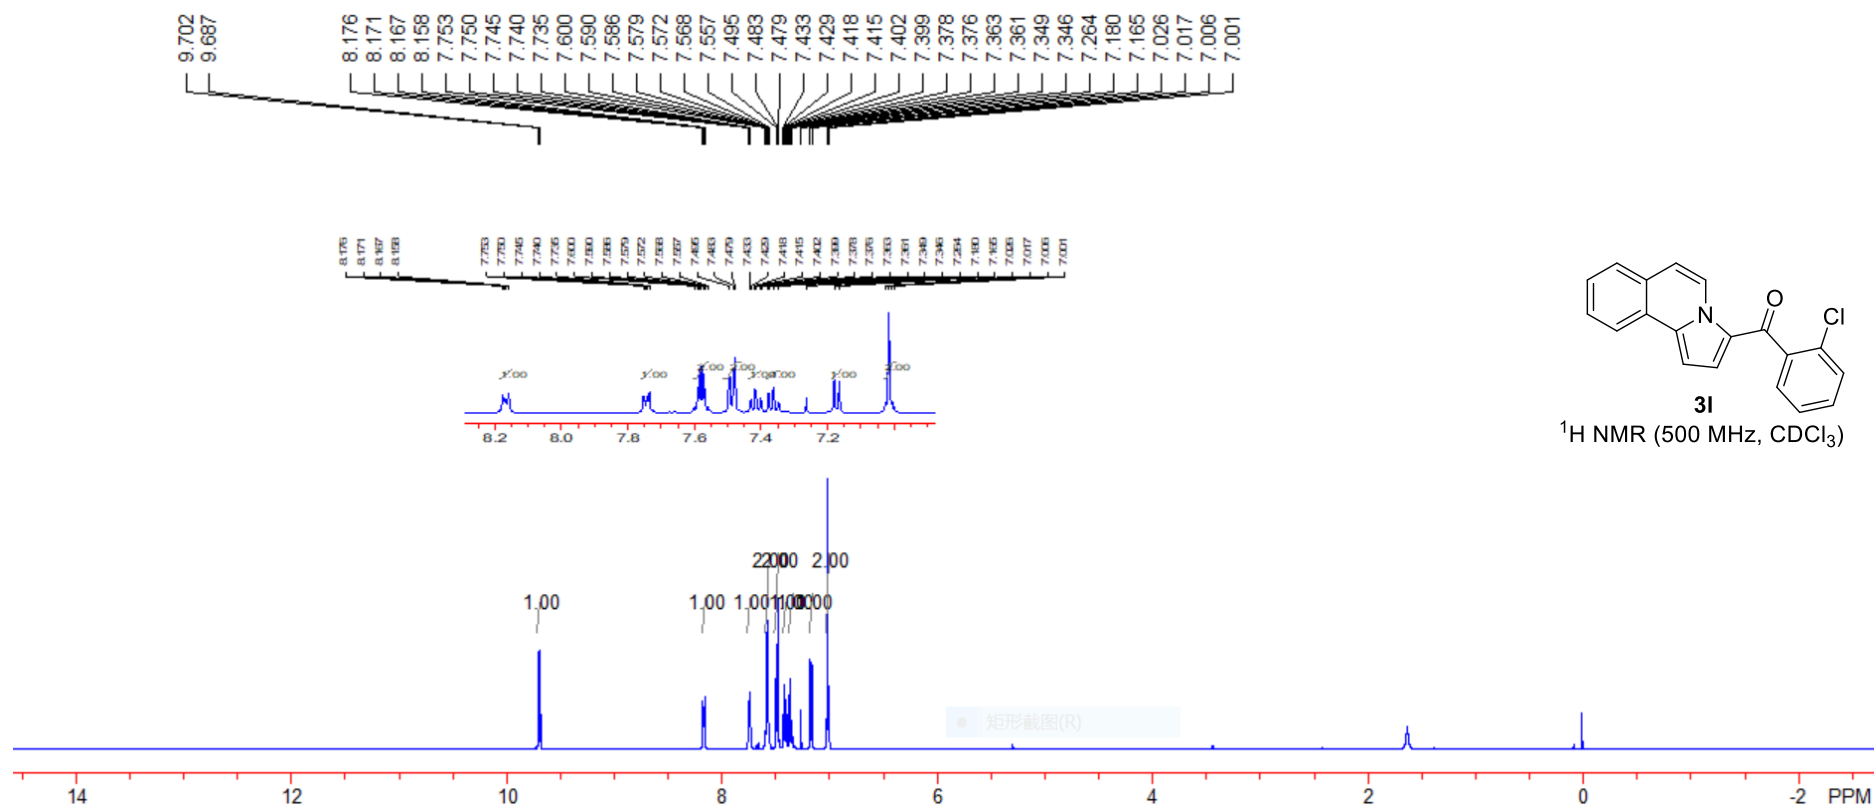

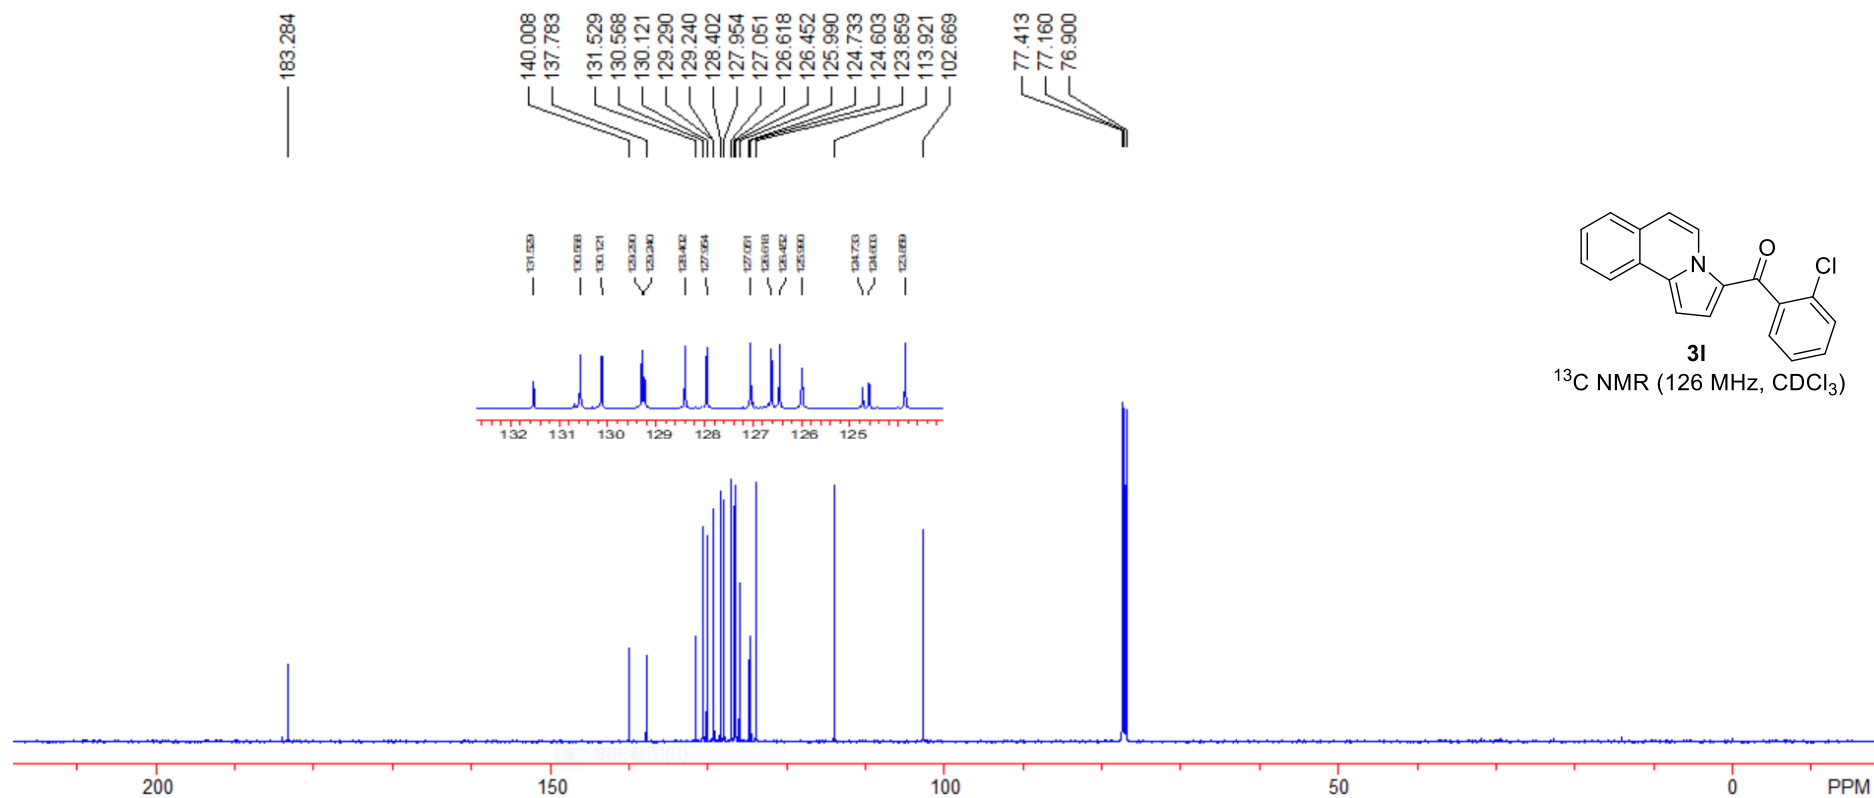

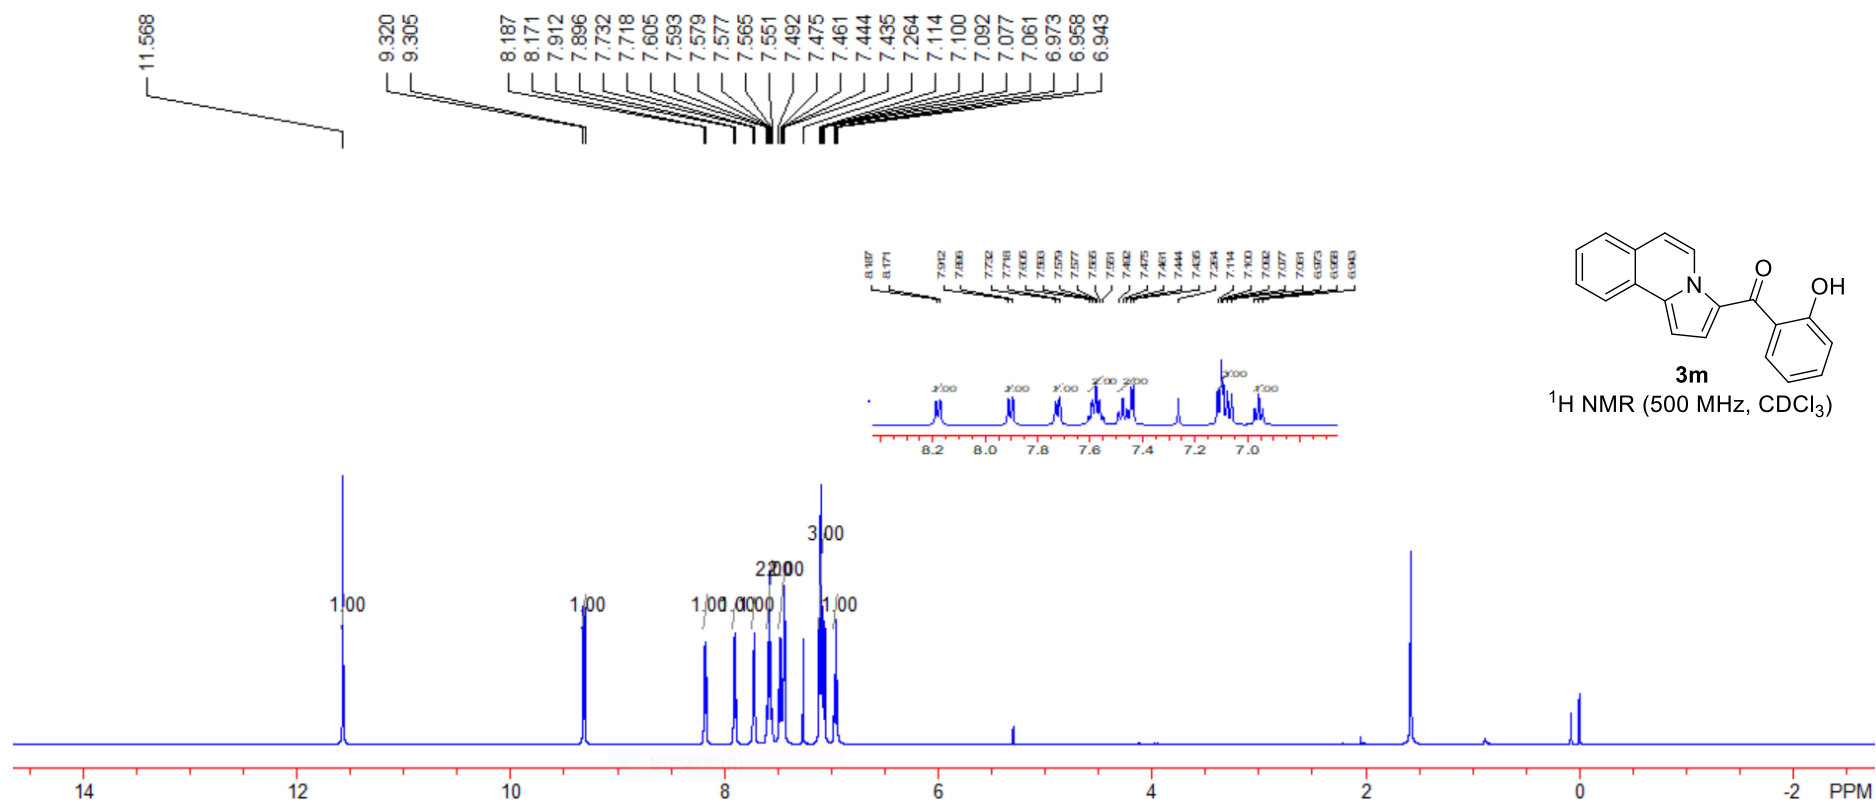

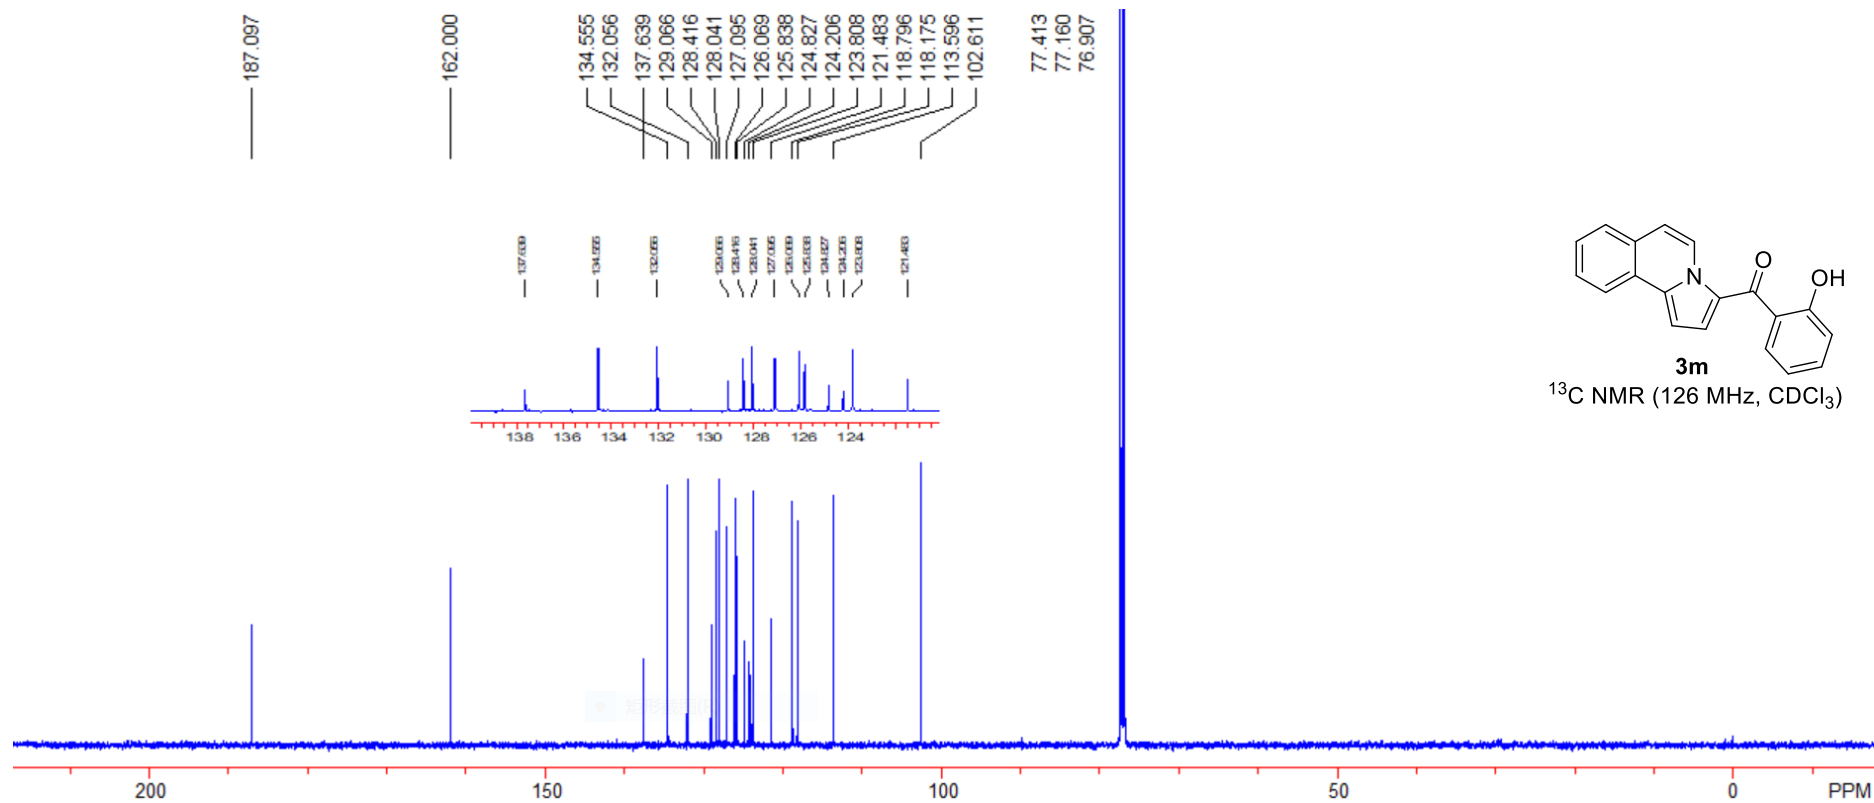

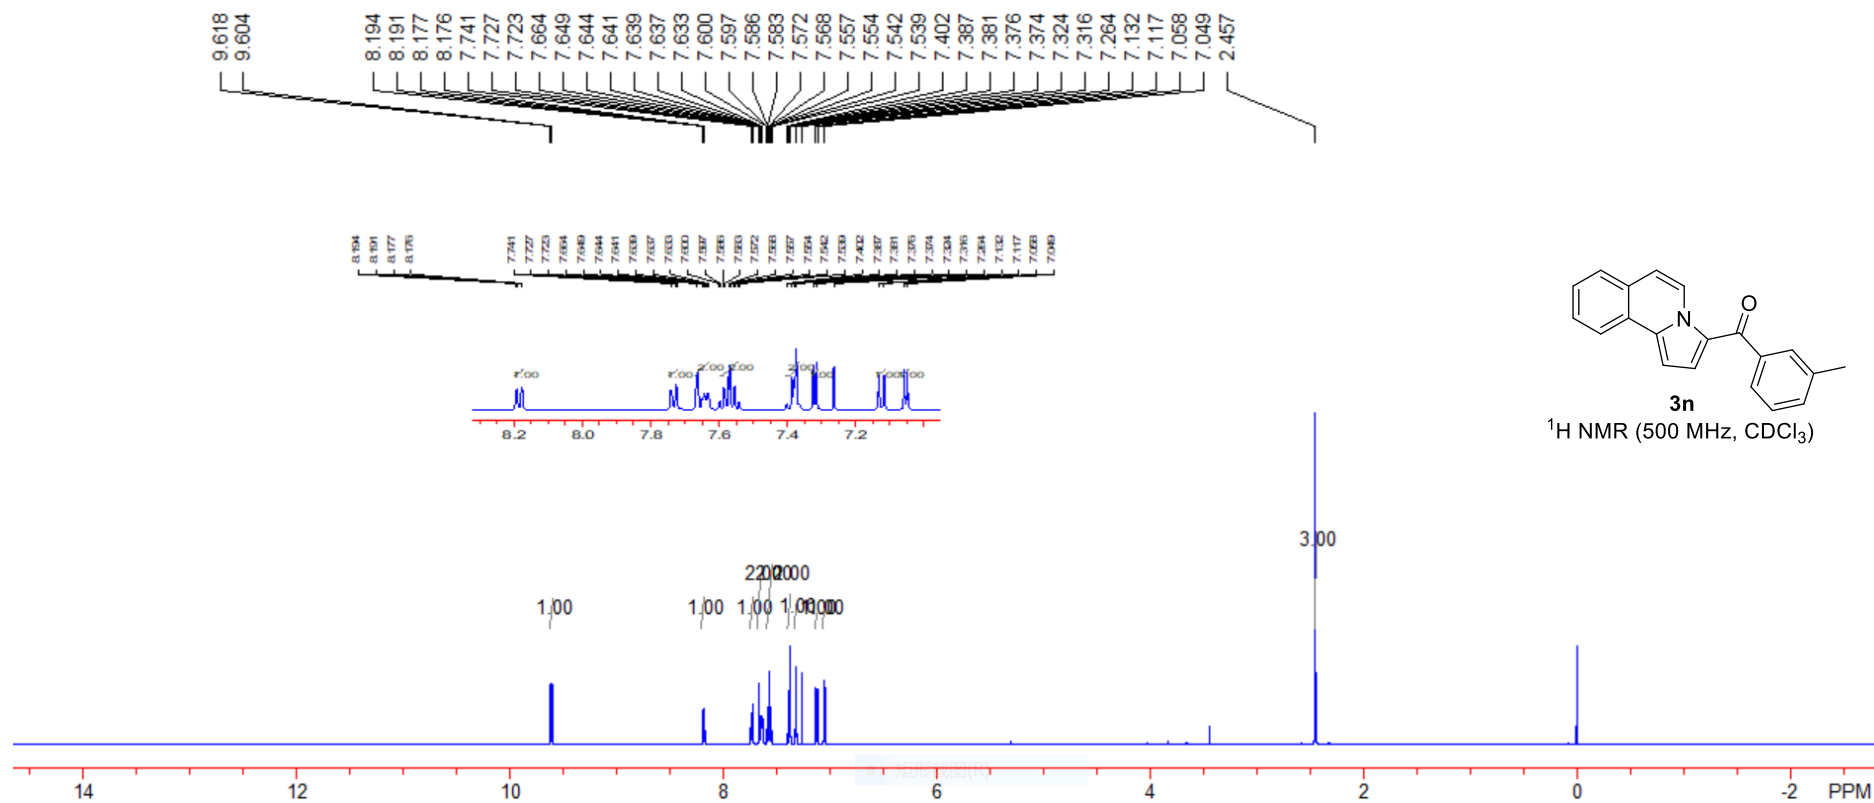



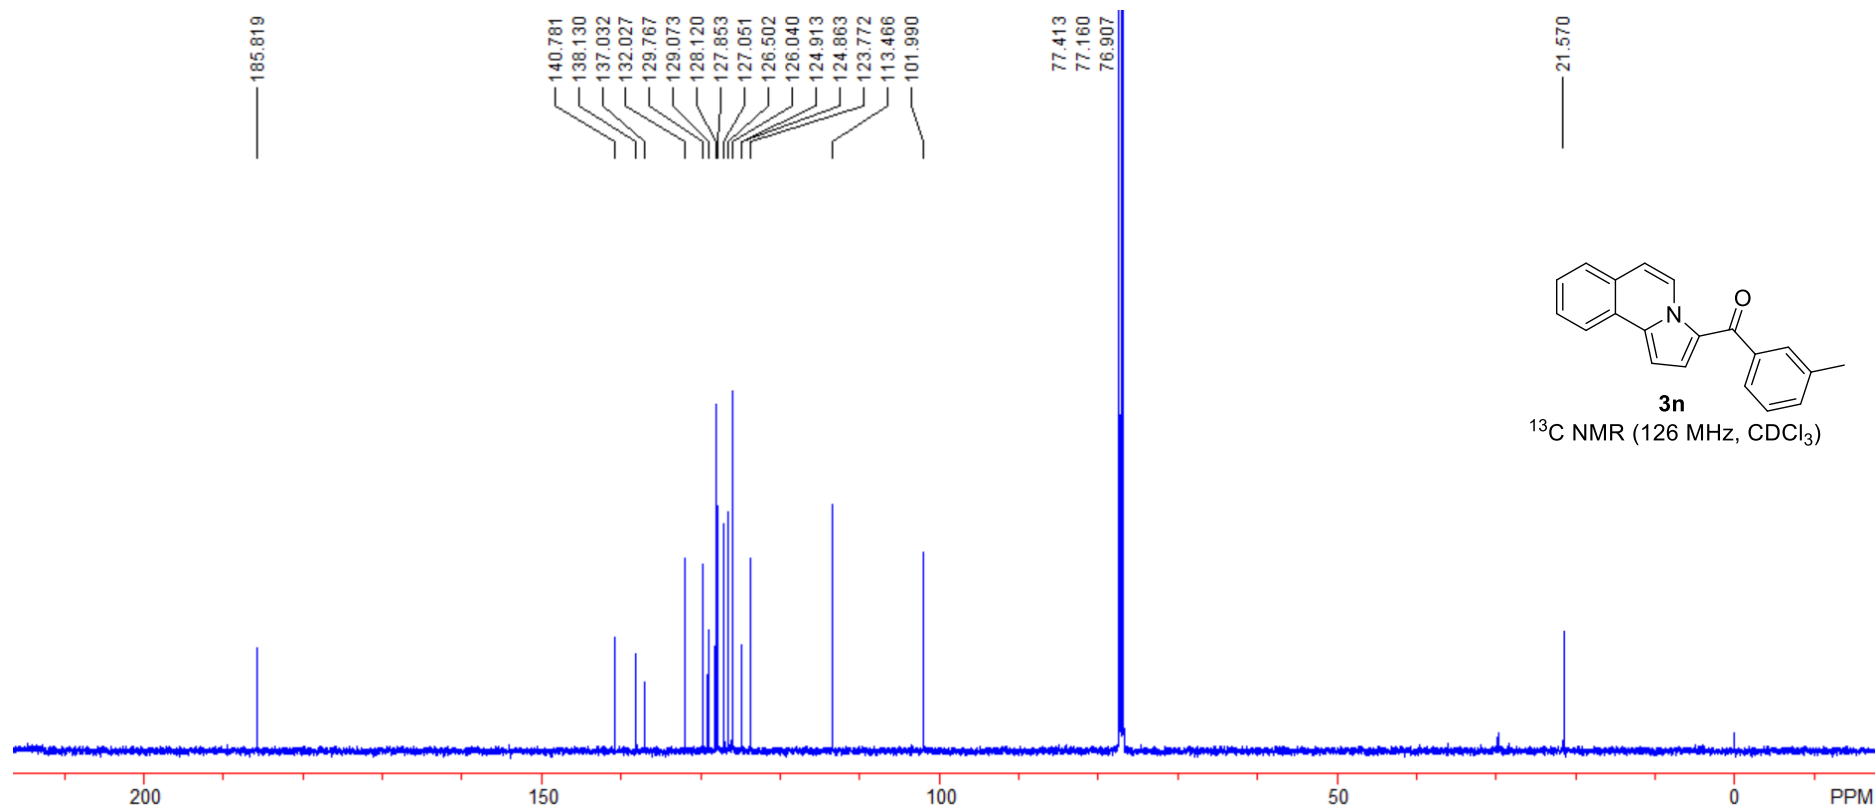

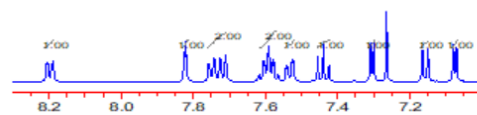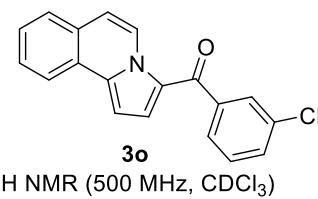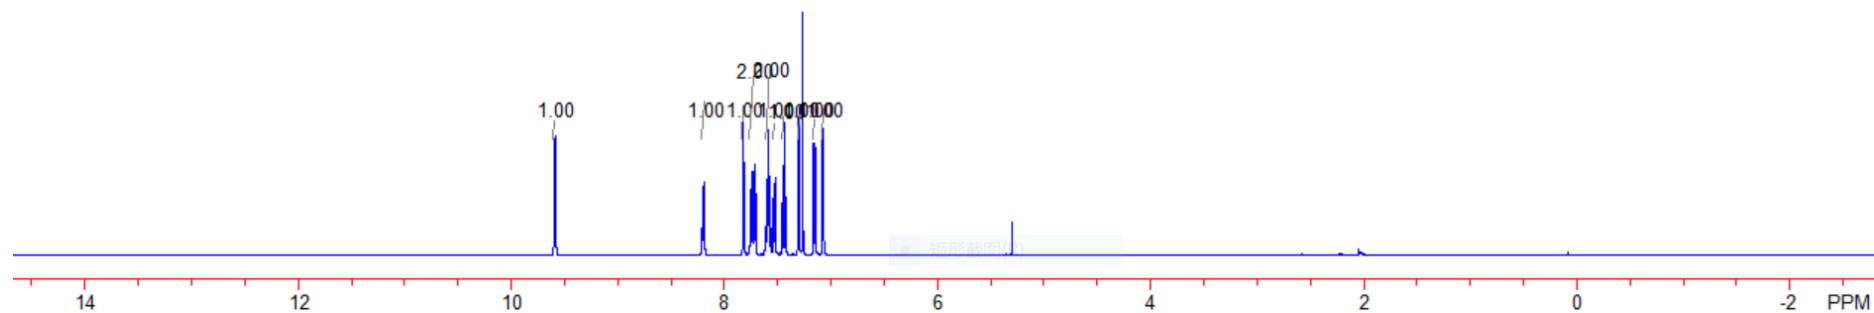

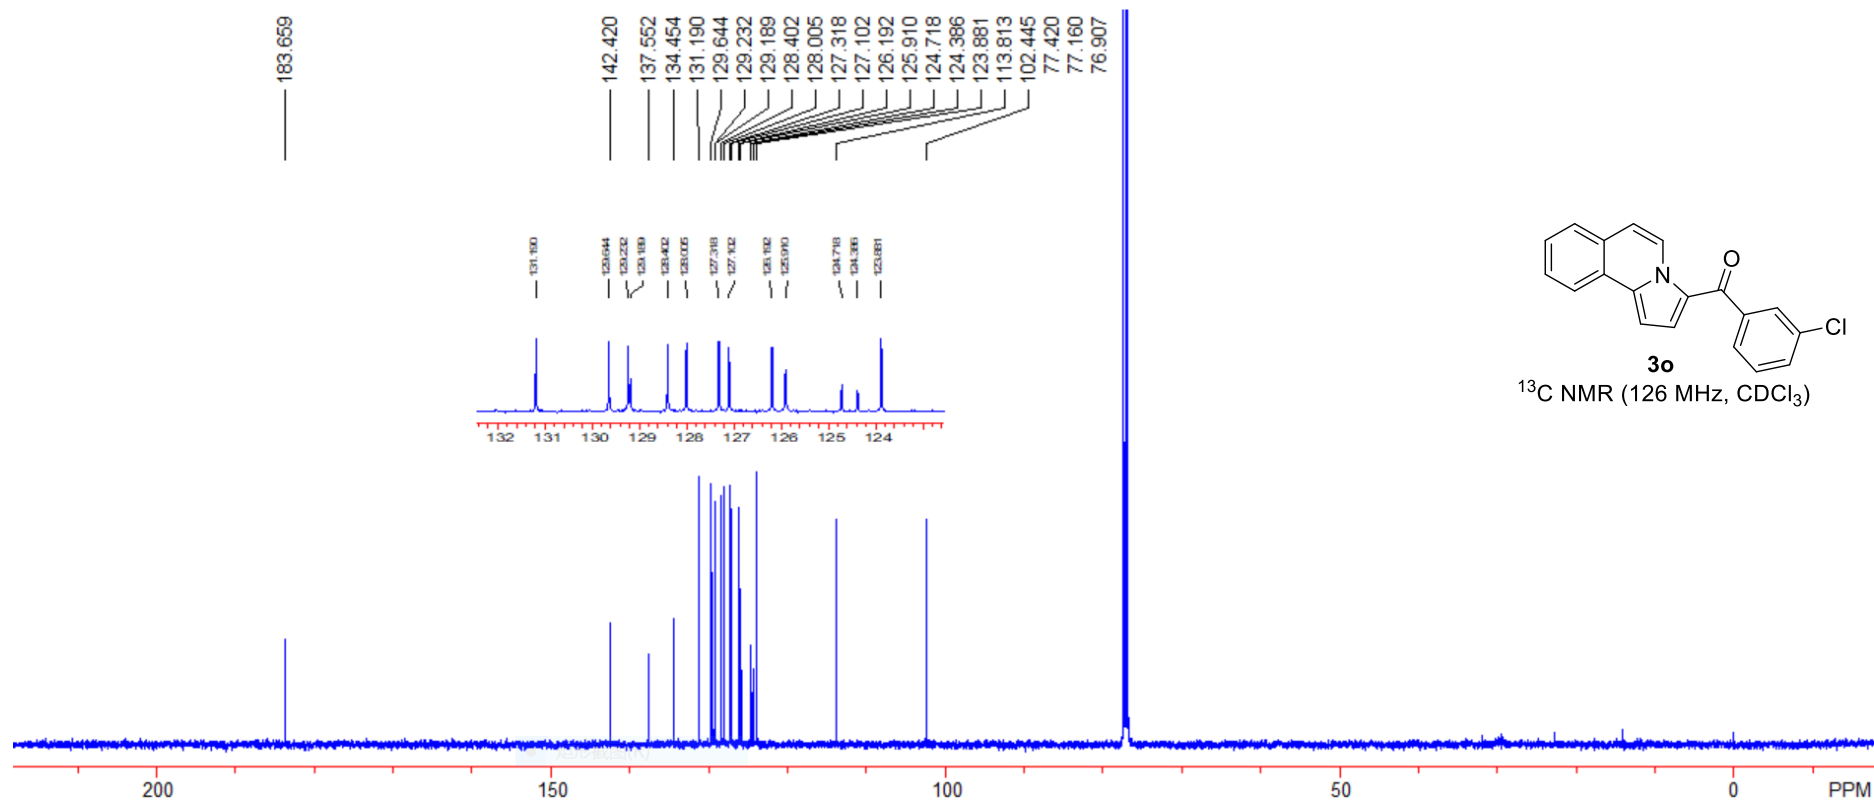

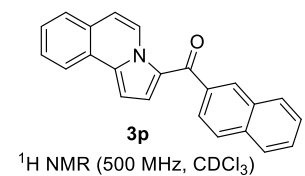

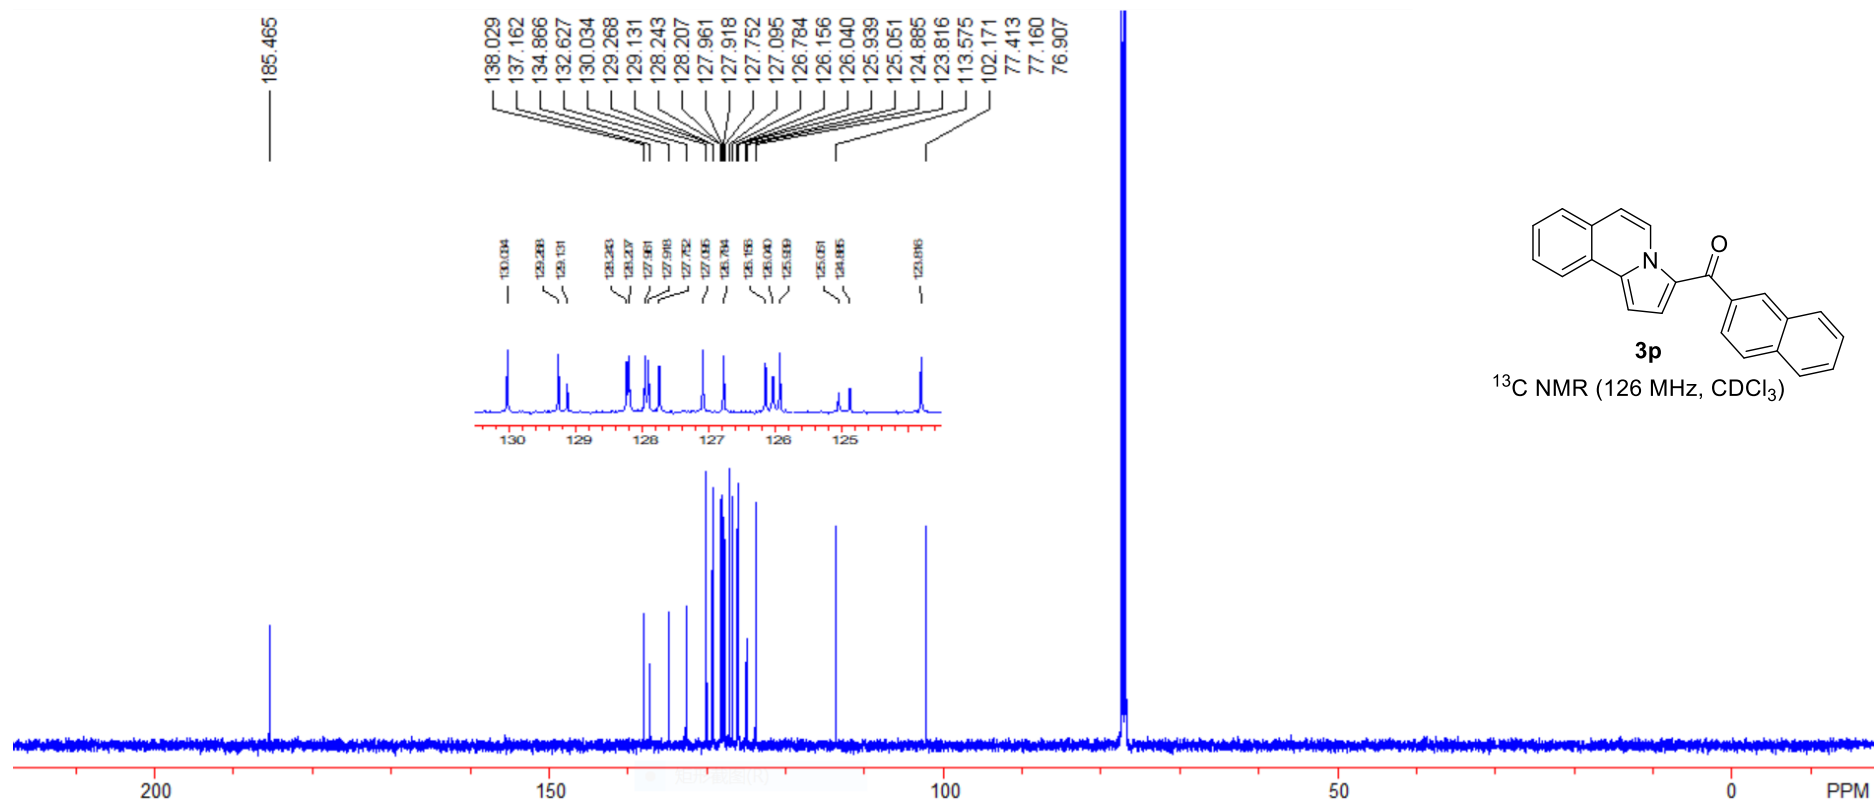

The purity of compounds **3a–3q** by HPLC.

| Compounds | RT (min) | Area (%) |
|-----------|----------|----------|
| <b>3a</b> | 9.058    | 98.84    |
| <b>3b</b> | 9.694    | 98.02    |
| <b>3c</b> | 8.676    | 99.89    |
| <b>3d</b> | 7.195    | 99.99    |
| <b>3e</b> | 9.083    | 98.81    |
| <b>3f</b> | 8.030    | 95.08    |
| <b>3g</b> | 9.509    | 99.99    |
| <b>3h</b> | 9.130    | 98.90    |
| <b>3i</b> | 8.508    | 99.99    |
| <b>3j</b> | 8.991    | 98.19    |
| <b>3k</b> | 7.709    | 99.85    |
| <b>3l</b> | 8.012    | 99.83    |
| <b>3m</b> | 8.491    | 98.51    |
| <b>3n</b> | 8.030    | 99.84    |
| <b>3o</b> | 9.175    | 99.38    |
| <b>3p</b> | 9.439    | 98.65    |

**3a**

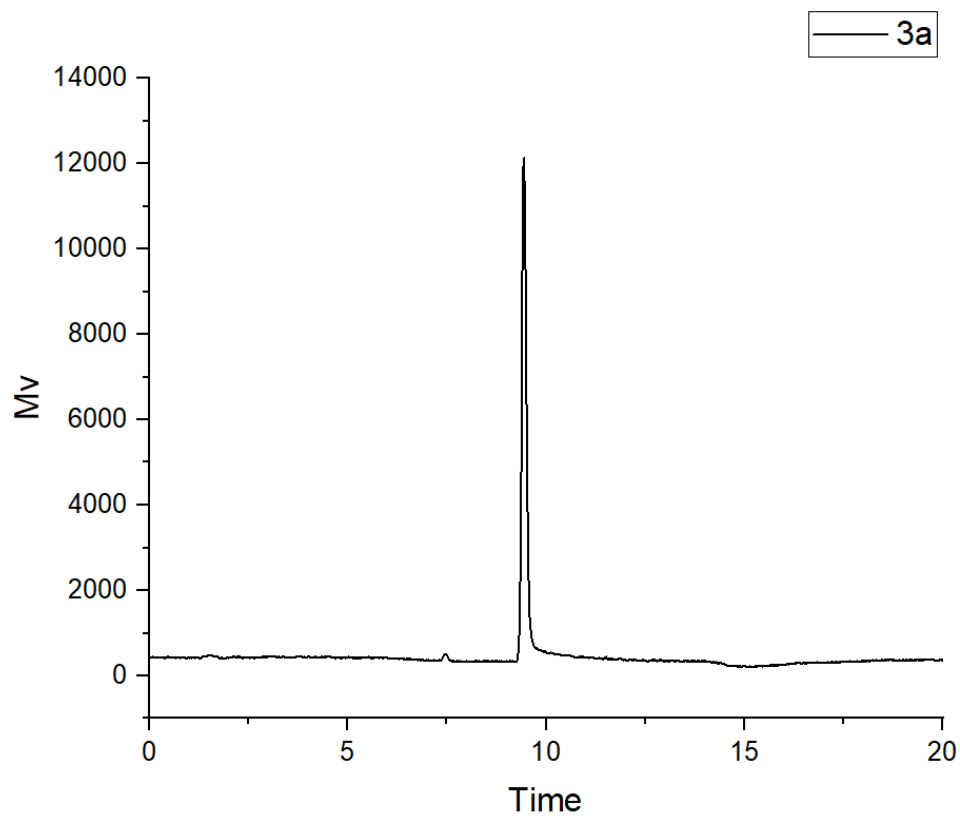

**3b**

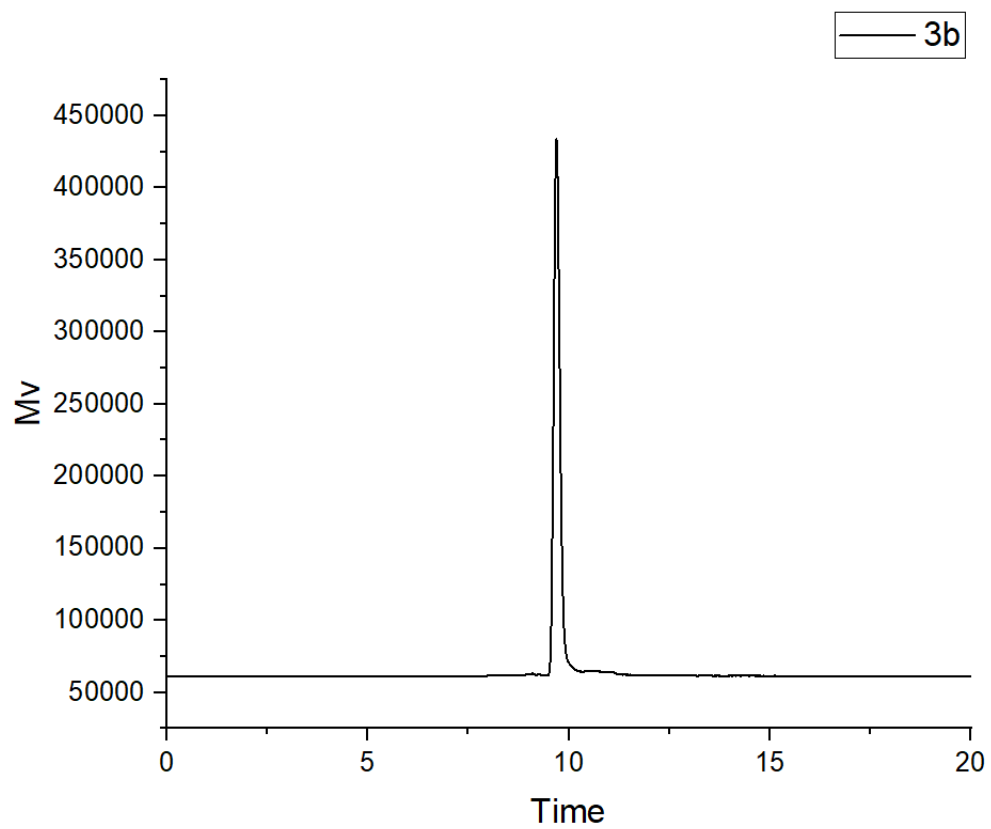

3c

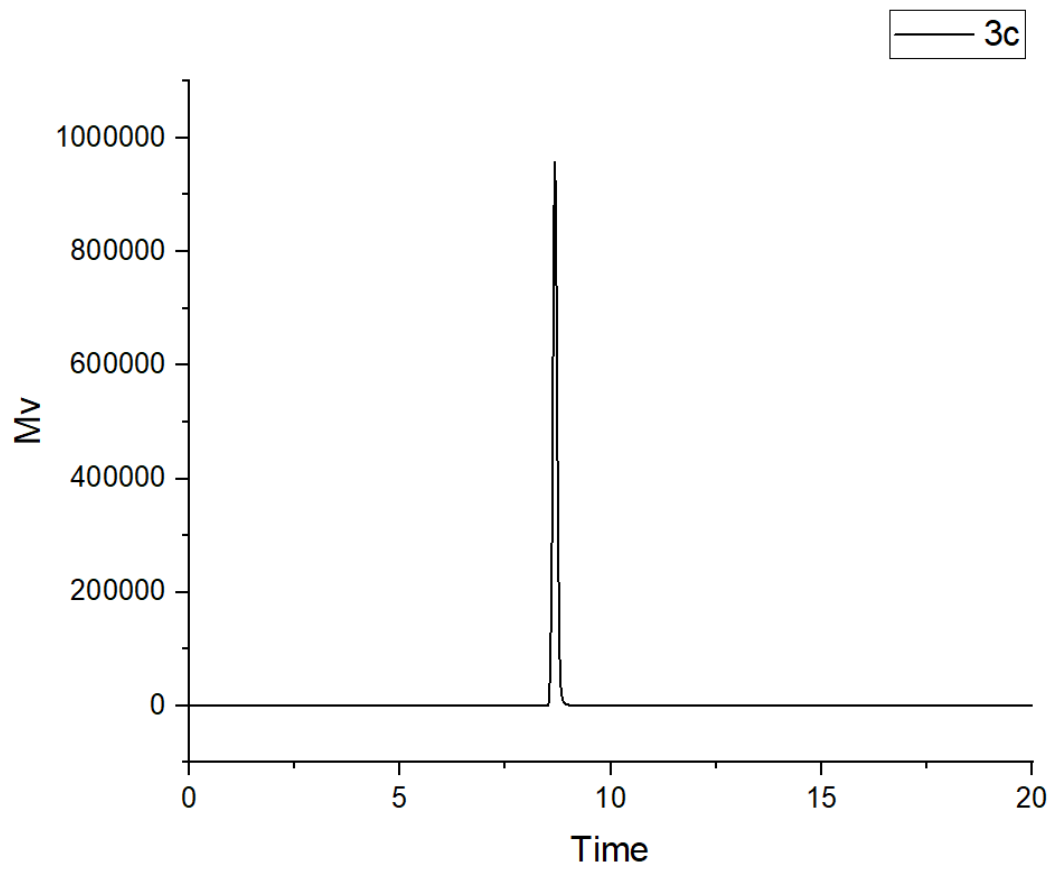

3d

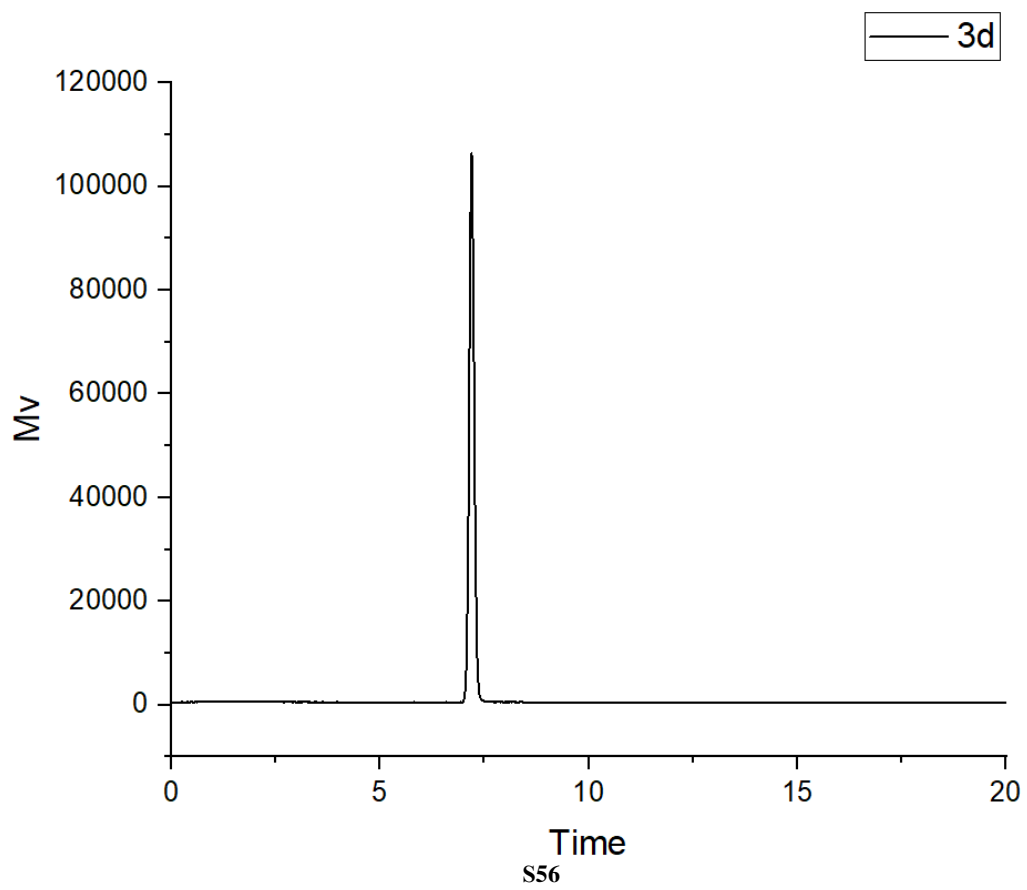



3e

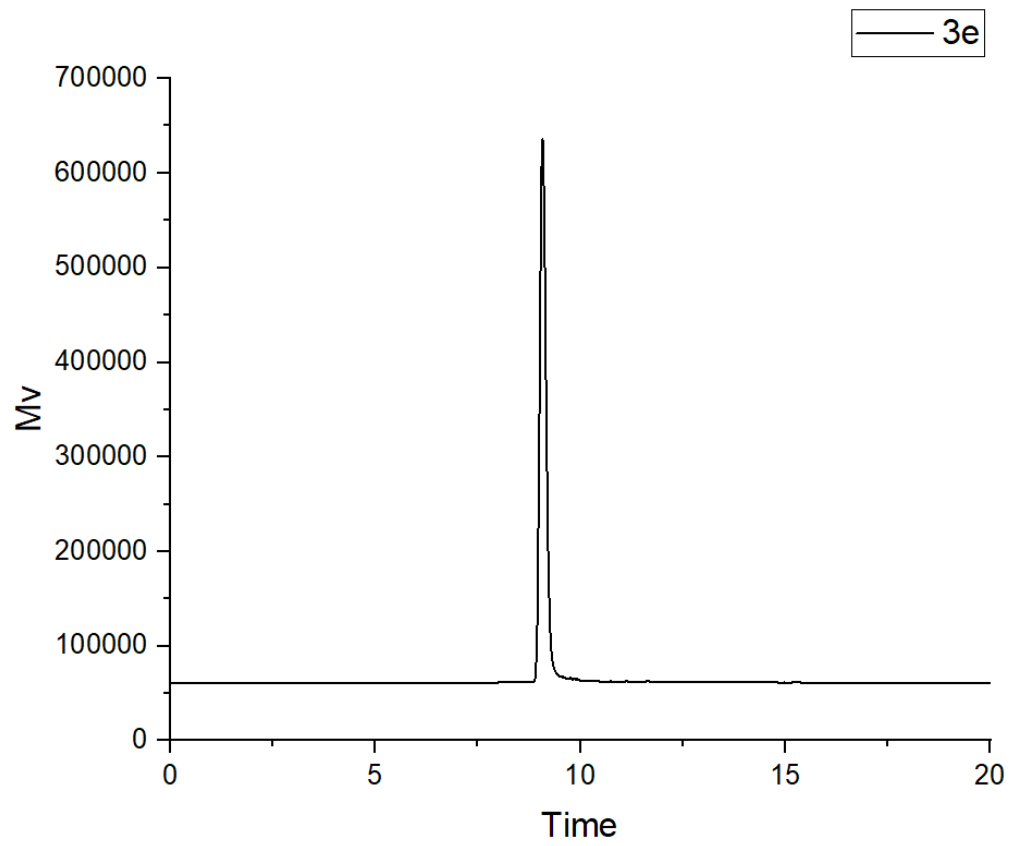

3f

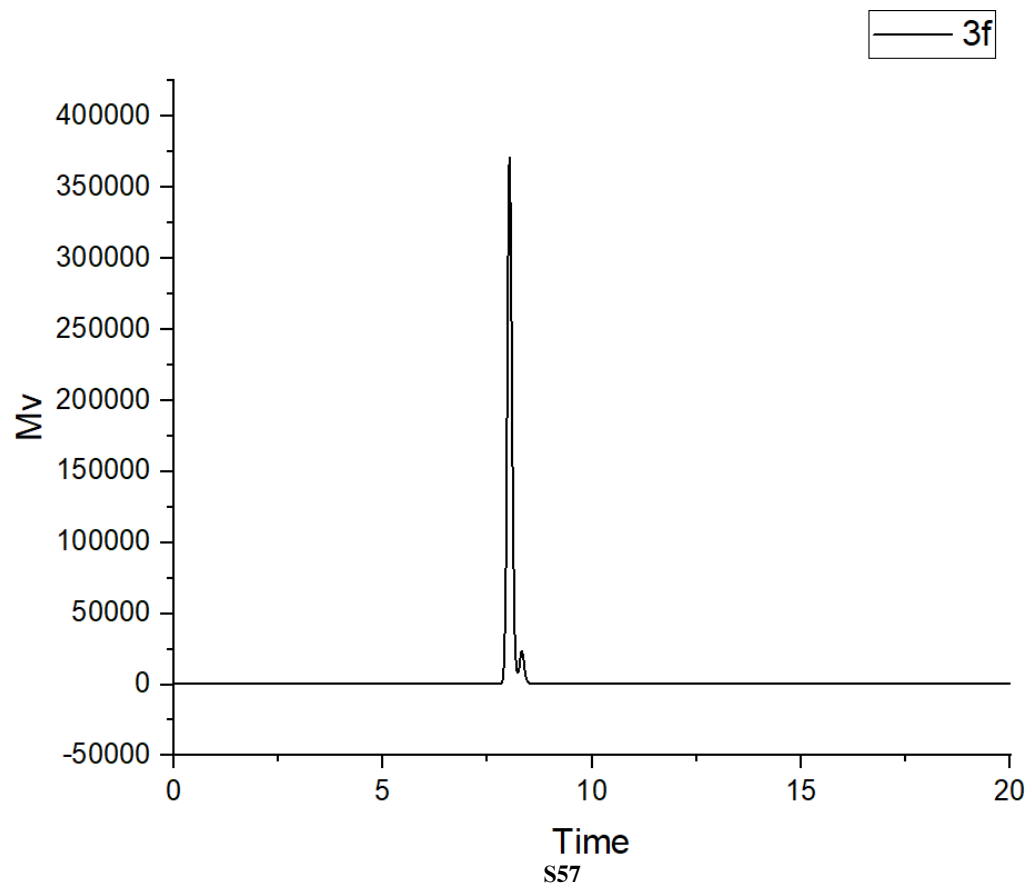

3g

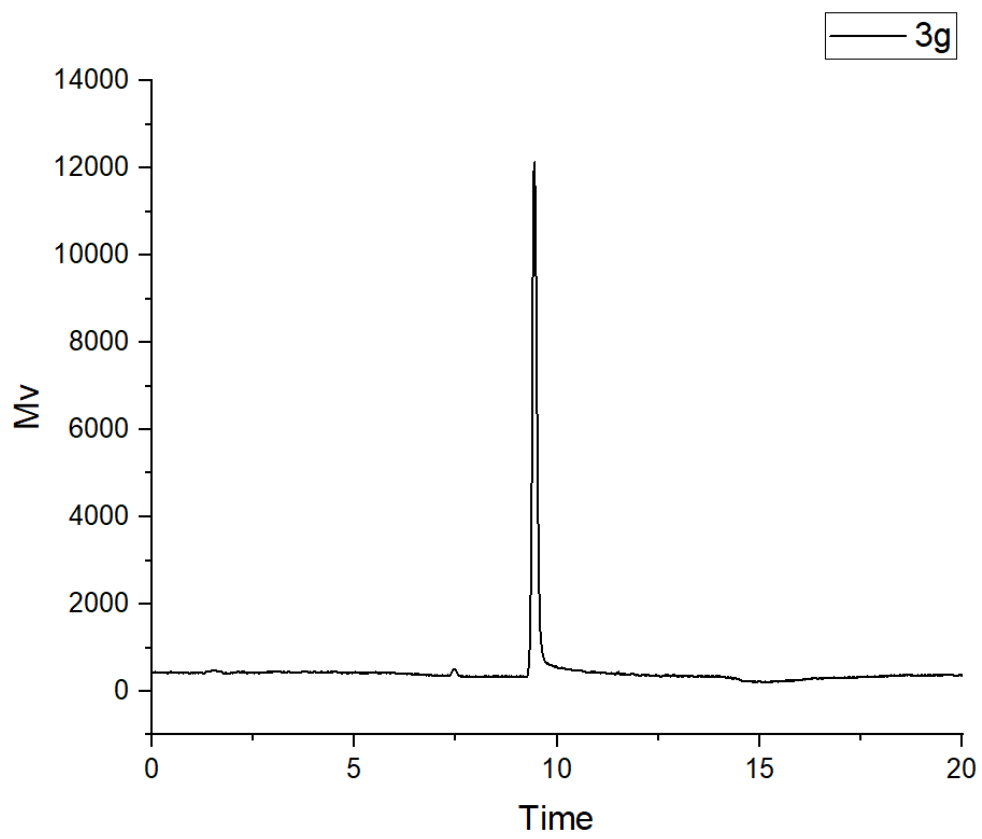

3h

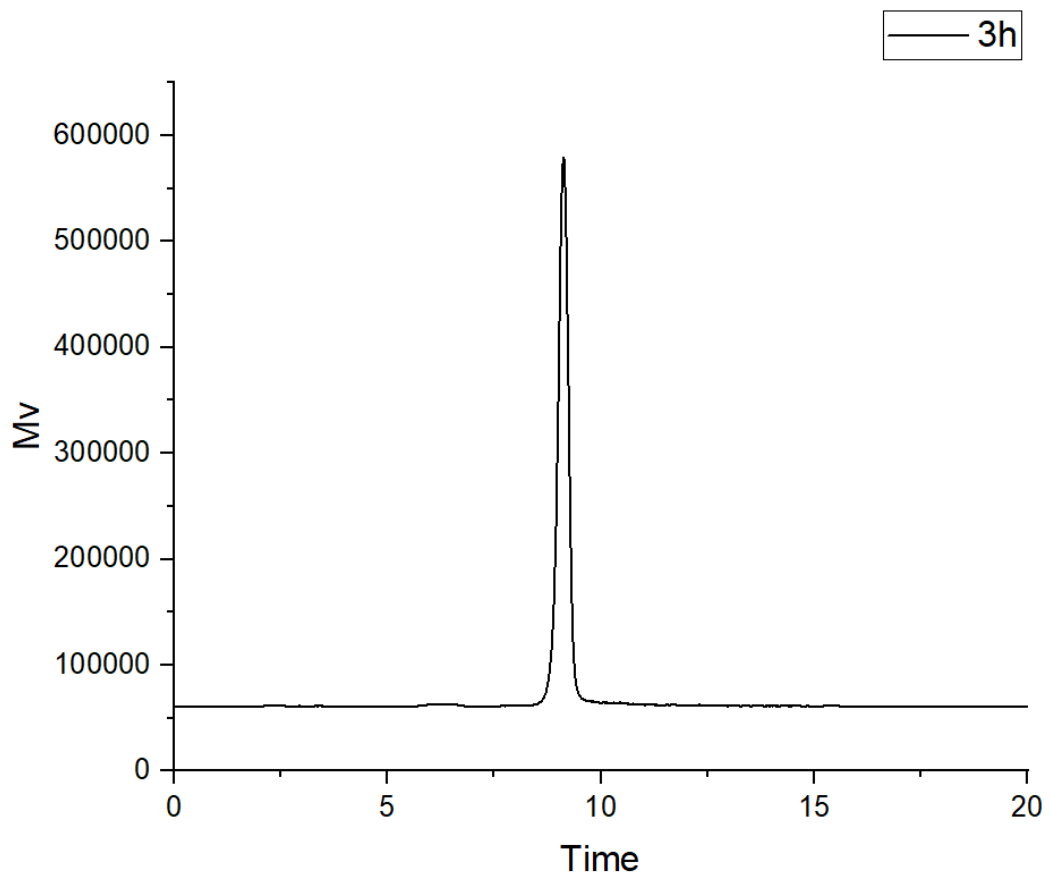

3i

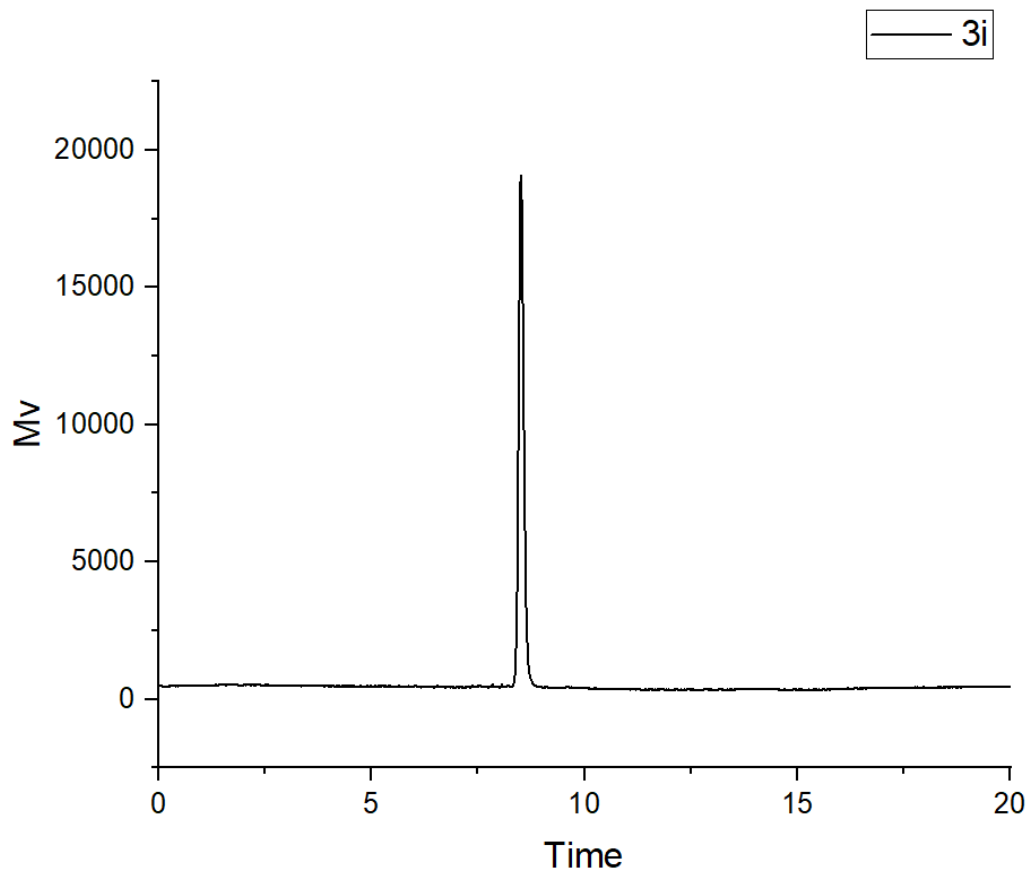

3j

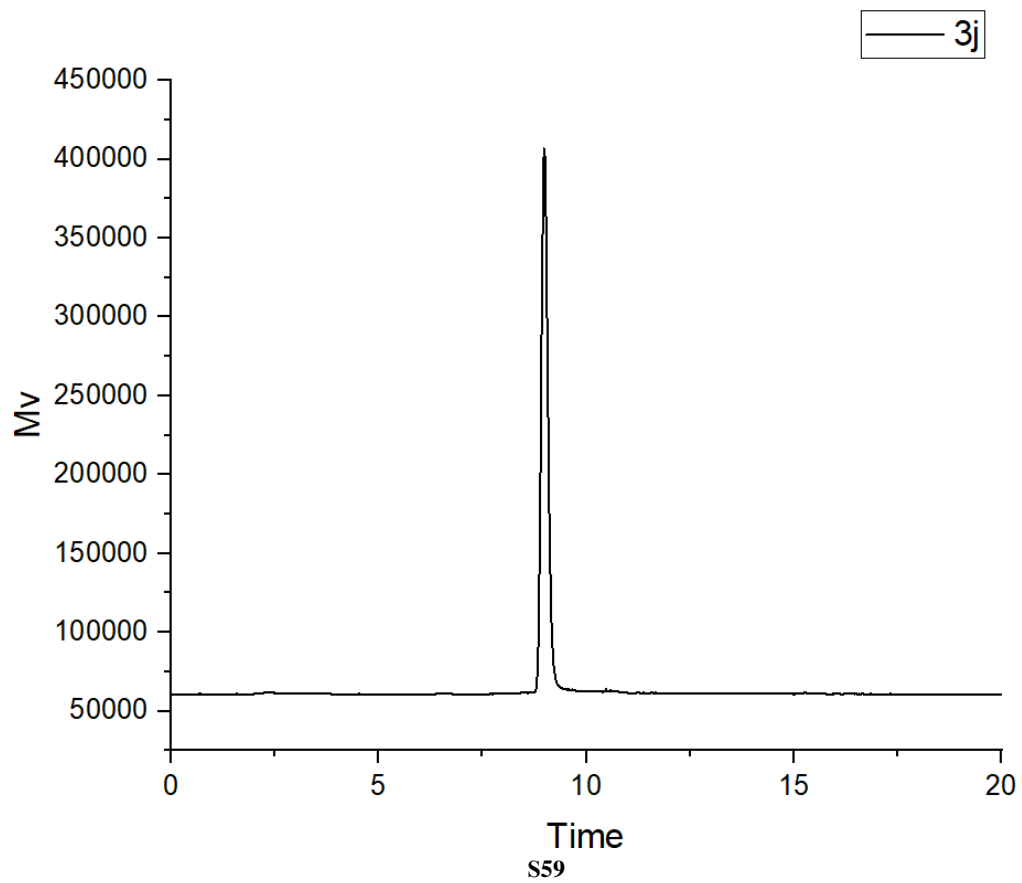

3k

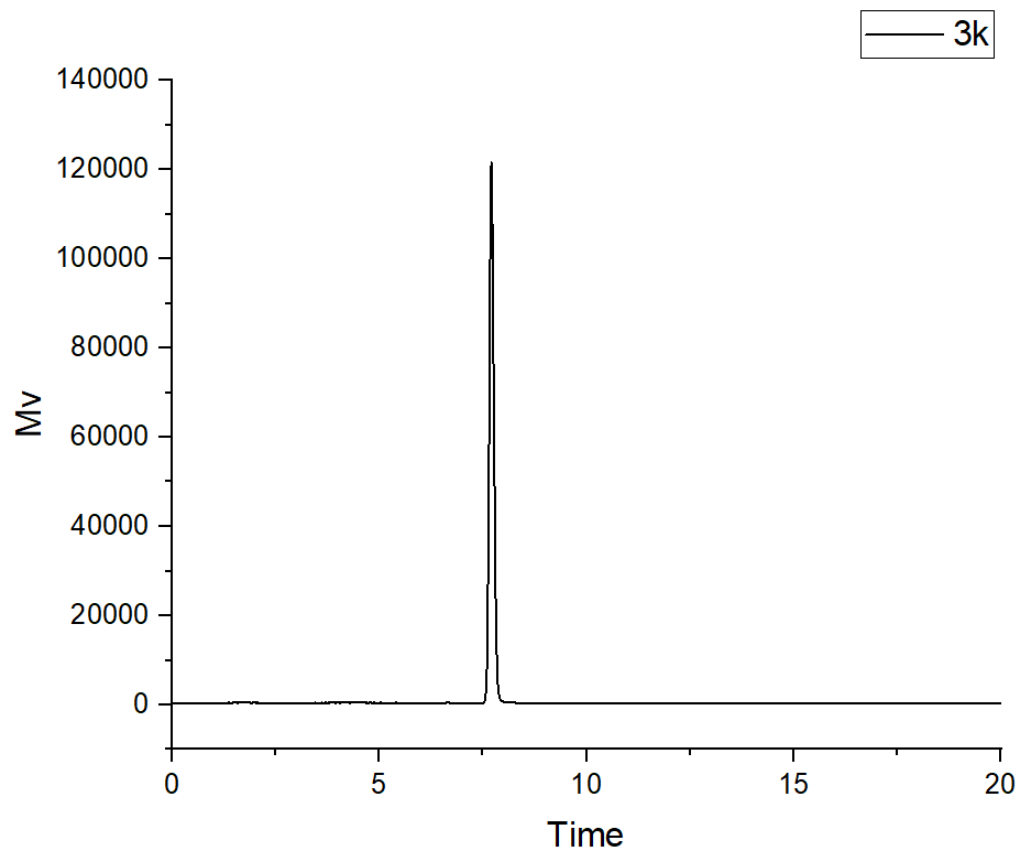

3l

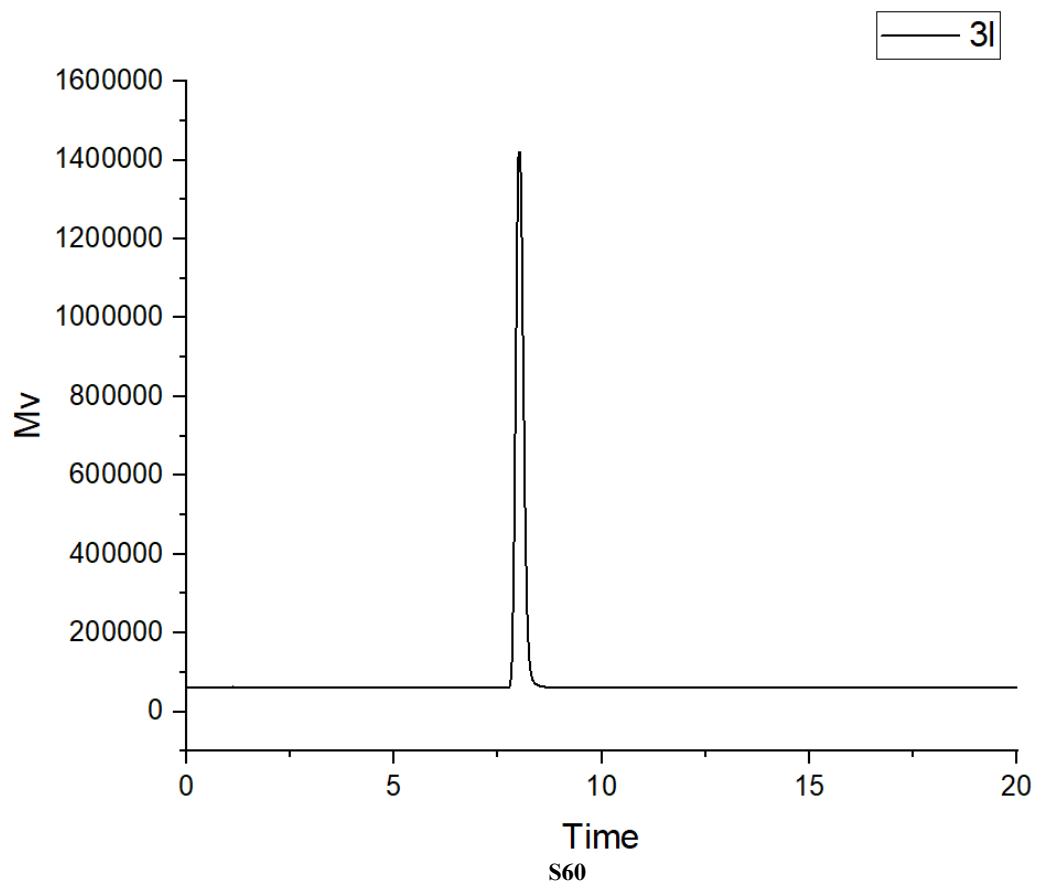

3m

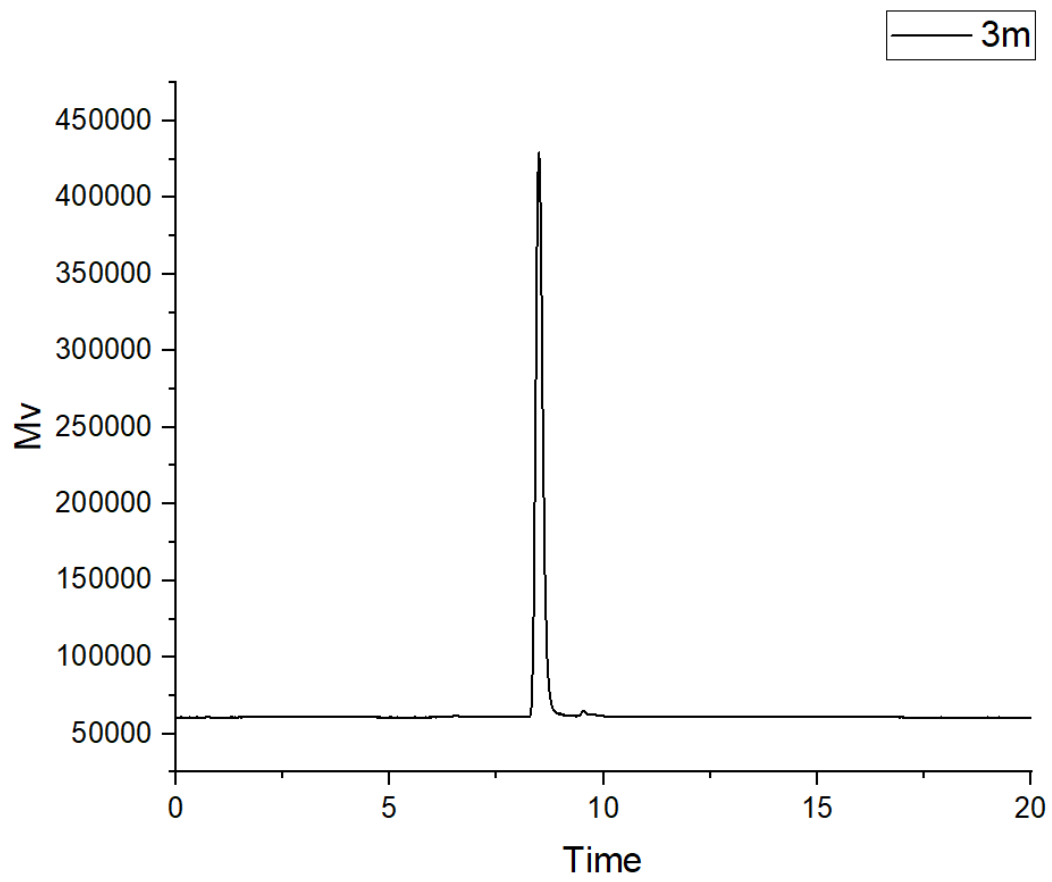

3n

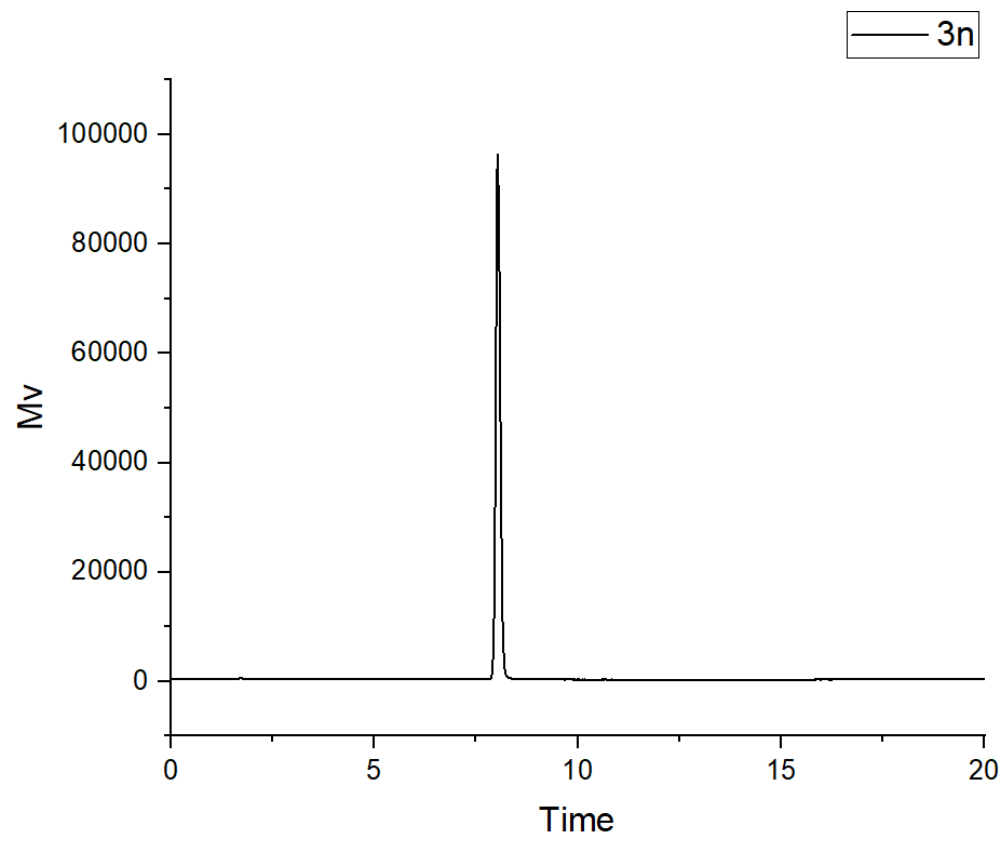

3o

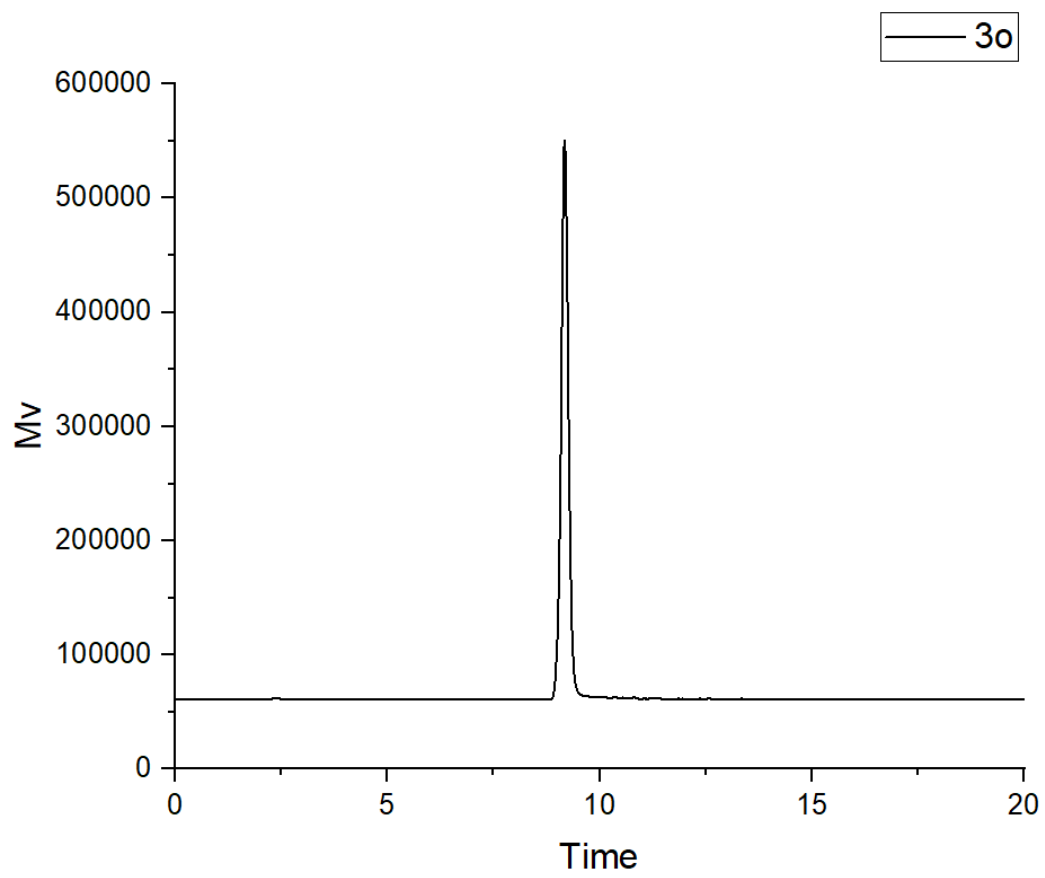

3p

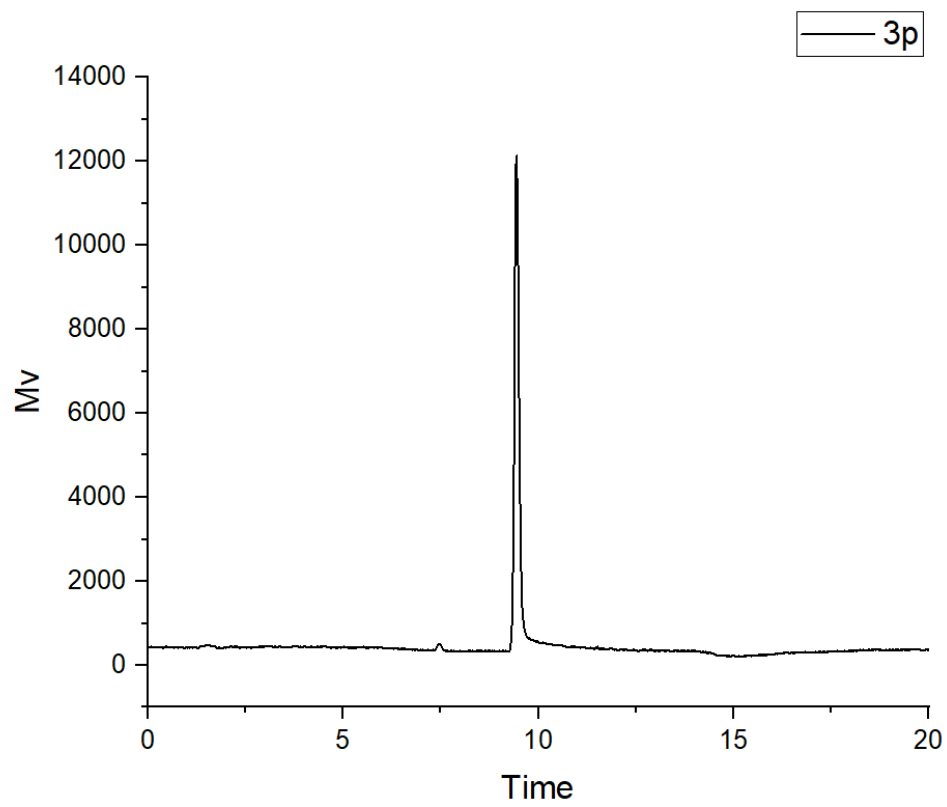

Supplement: d5ra05055c1.pdf [file d5ra05055c1.pdf]
